# Supplementary material for: Changes in the Metabolome in Response to Low-Dose Exposure to Environmental Chemicals Used in Personal Care Products during Different Windows of Susceptibility
Source: PubMed Central journal article supplement (PMC4965097; doi:10.1371/journal.pone.0159919), 2016-07-28

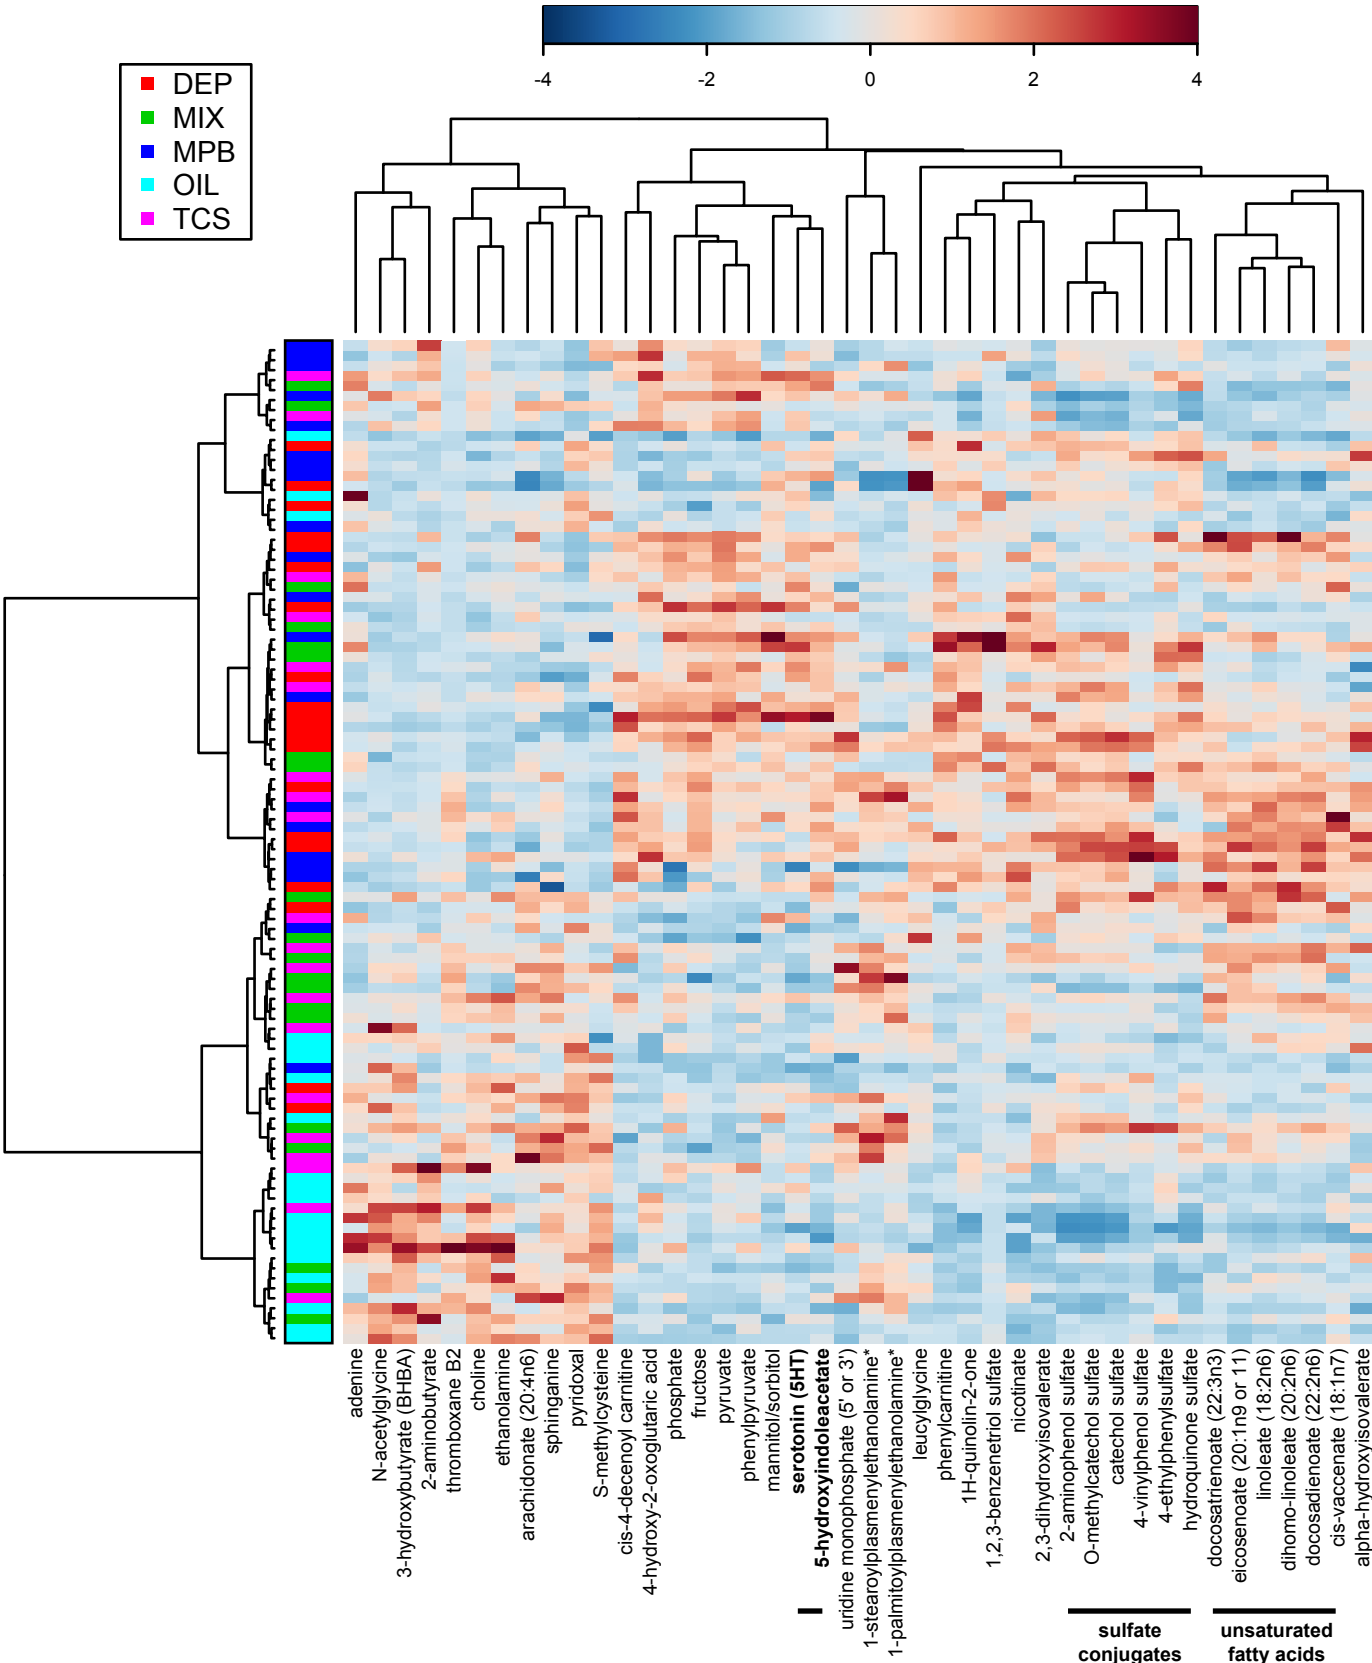

Supplement: pone.0159919.s001.pdf [file pone.0159919.s001.pdf]
