# Supplementary material for: Changes in the Metabolome in Response to Low-Dose Exposure to Environmental Chemicals Used in Personal Care Products during Different Windows of Susceptibility
Source: PLoS One. 2016 Jul 28;11(7):e0159919. doi: 10.1371/journal.pone.0159919 (PMC4965097; doi:10.1371/journal.pone.0159919)
Supplement: S1 Table — (XLSX) [file pone.0159919.s004.xlsx]

## Sheet: S1 Table
S1 Table. Complete dataset as provided by Metabolon.													SAMPLE_NAME	MSSM-00049	MSSM-00050	MSSM-00051	MSSM-00052	MSSM-00053	MSSM-00054	MSSM-00055	MSSM-00056	MSSM-00057	MSSM-00058	MSSM-00059	MSSM-00060	MSSM-00061	MSSM-00062	MSSM-00063	MSSM-00064	MSSM-00065	MSSM-00066	MSSM-00067	MSSM-00068	MSSM-00069	MSSM-00070	MSSM-00071	MSSM-00072	MSSM-00073	MSSM-00074	MSSM-00075	MSSM-00076	MSSM-00077	MSSM-00078	MSSM-00079	MSSM-00080	MSSM-00081	MSSM-00082	MSSM-00083	MSSM-00084
													SAMPLE_ID	2076670	2076671	2076672	2076673	2076674	2076675	2076676	2076677	2076678	2076679	2076680	2076681	2076682	2076683	2076684	2076685	2076686	2076687	2076688	2076689	2076690	2076691	2076692	2076693	2076694	2076695	2076696	2076697	2076698	2076699	2076700	2076701	2076702	2076703	2076704	2076705
	36 with at least 30% missing values in total or for one specific developmental window												CLIENT_IDENTIFIER	11	12	13	14	15	19	20	21	22	23	111	112	113	114	115	119	120	121	122	123	211	212	213	214	215	219	220	221	222	223	311	312	313	314	315	319
													CONTRACT_GROUP	5	5	5	5	5	6	6	6	6	6	9	9	9	9	9	10	10	10	10	10	13	13	13	13	13	14	14	14	14	14	17	17	17	17	17	18
													GROUP_DESCRIPTION	DEP Prep	DEP Prep	DEP Prep	DEP Prep	DEP Prep	DEP Pub	DEP Pub	DEP Pub	DEP Pub	DEP Pub	MPB Prep	MPB Prep	MPB Prep	MPB Prep	MPB Prep	MPB Pub	MPB Pub	MPB Pub	MPB Pub	MPB Pub	TCS Prep	TCS Prep	TCS Prep	TCS Prep	TCS Prep	TCS Pub	TCS Pub	TCS Pub	TCS Pub	TCS Pub	MIX Prep	MIX Prep	MIX Prep	MIX Prep	MIX Prep	MIX Pub
													MANIFEST_GROUP	1	1	1	1	1	2	2	2	2	2	3	3	3	3	3	4	4	4	4	4	5	5	5	5	5	6	6	6	6	6	7	7	7	7	7	8
													RUN_DAY	1	2	3	2	3	1	2	3	3	1	1	2	3	3	1	1	2	3	1	2	1	2	3	1	2	1	2	3	2	3	1	2	3	2	3	1
													STAGE	Prep	Prep	Prep	Prep	Prep	Pub	Pub	Pub	Pub	Pub	Prep	Prep	Prep	Prep	Prep	Pub	Pub	Pub	Pub	Pub	Prep	Prep	Prep	Prep	Prep	Pub	Pub	Pub	Pub	Pub	Prep	Prep	Prep	Prep	Prep	Pub
													TREATMENT	DEP	DEP	DEP	DEP	DEP	DEP	DEP	DEP	DEP	DEP	MPB	MPB	MPB	MPB	MPB	MPB	MPB	MPB	MPB	MPB	TCS	TCS	TCS	TCS	TCS	TCS	TCS	TCS	TCS	TCS	MIX	MIX	MIX	MIX	MIX	MIX
PATHWAY_SORTORDER	BIOCHEMICAL	SUPER_PATHWAY	SUB_PATHWAY	COMP_ID	PLATFORM	CHEMICAL_ID	RI	MASS	CAS	PUBCHEM	CHEMSPIDER	KEGG	Group HMDB_ID	DEP Prep	DEP Prep	DEP Prep	DEP Prep	DEP Prep	DEP Pub	DEP Pub	DEP Pub	DEP Pub	DEP Pub	MPB Prep	MPB Prep	MPB Prep	MPB Prep	MPB Prep	MPB Pub	MPB Pub	MPB Pub	MPB Pub	MPB Pub	TCS Prep	TCS Prep	TCS Prep	TCS Prep	TCS Prep	TCS Pub	TCS Pub	TCS Pub	TCS Pub	TCS Pub	MIX Prep	MIX Prep	MIX Prep	MIX Prep	MIX Prep	MIX Pub
3345	1,2,3-benzenetriol sulfate (2)	Xenobiotics	Chemical	48762	LC/MS Neg	100006374	1709	204.981					HMDB60016	942064	1369162	1218463	122750	810034	160986	396250	129973	706527	1259793	419324	309639	311031	798389	406666	38847	679439	394635	518289	317224	374345	148166	156139	143818	27576	197785		215308	182565	82414	101269	96253	45863	149035	118317	61040
1546	1,2-dipalmitoylglycerol	Lipid	Diacylglycerol	11953	GC/MS	850	2600	145	40290-32-2	99931	90288		HMDB07098	692739	538277	849894	643282	696532	506353	717391	589058	516372	544948		931841	686138	550698	777647	254705	518854	444666	1261515	517501	559976	730756	887600	920394	642576	573777	546863	542570	472349	493856	381692	601819	605938	531660	653883	452904
758	1,5-anhydroglucitol (1,5-AG)	Carbohydrate	Glycolysis, Gluconeogenesis, and Pyruvate Metabolism	20675	LC/MS Neg	100000580	802	163.061	154-58-5	64960		C07326	HMDB02712	43759864	45726120	37799248	63159816	43534296	69582448	55382692	41537208	71708024	103326160	57321176	62586492	48086960	32620434	38153320	32701832	36570020	35208240	56475400	40975448	37581964	37030580	37480948	40261788	37202544	54377924	48444608	51782484	40421404	39556860	70941504	77379472	86700360	78756240	67894064	40698424
1411	1-arachidonoylglycerophosphocholine (20:4n6)*	Lipid	Lysolipid	33228	LC/MS Pos	100001551	5552	544.34			21403155	C05208	HMDB10395	19037978	243835792	74254328	44474096	91691112	511420800	484463936	312981472	439251456	419664640	281849952	35544488	41344412	7222828	162819360	322926048	426324608	478661184	445837312	447614752	358972864	171593552	19806828	225670176	49487568	450109568	456580256	357054848	436236352	513610240	161861088	117694008	85584064	52571700	269213408	413275328
1440	1-arachidonoylglycerophosphoethanolamine*	Lipid	Lysolipid	35186	LC/MS Neg	100001571	5874	500.278		42607465	21403171		HMDB11517	8827617	17365286	8376866	12713060	9738034	13837738	22994402	15083294	22063428	23681436	12840268	6591503	6603863	6564401	12527570	17215914	17417992	17551820	17456816	17216372	12937607	9829024	8012309	15663501	8978228	28214040	19960264	27594914	20920870	19784520	13576449	12419485	8423120	7542869	17083164	27761642
1461	1-arachidonoylglycerophosphoinositol*	Lipid	Lysolipid	34214	LC/MS Neg	100001654	5482	619.289						681602	1425819	644126	795974	1183456	1956153	1950078	1653331	1982077	2095158	1609852	412131	628046	164337	2108442	1331823	1524221	1260274	1503000	1402015	2088805	1415255	365633	2097035	797462	3405004	2333532	2765312	2239863	2327753	883527	1342913	792963	643288	3089095	2098632
1533	1-arachidonylglycerol	Lipid	Monoacylglycerol	34397	LC/MS Neg	100001433	6450	303.233	35474-99-8	5282281	4445452	C13857	HMDB11572	1265487	947470	506606	937842	639647	2124103	3391183	6067105	2490021	2371105	1927054	731006	357812		1320236	2795694	2576418	1773608	2694420	2015977	2083147	1033930	123195	1337736	928980	2506332	2035425	2509808	1937596	1741010	1272546	1223330	625255	433356	4364187	1413202
1540	1-dihomo-linolenylglycerol (alpha, gamma)	Lipid	Monoacylglycerol	48341	LC/MS Neg	100006121	6220	305.249					HMDB11577	675492	417350	272132	441225	429235	328220	252103	634465	472221	175086	710478	441479	124961	54174	429949	362034	289223	208984	872655	290483	504895	250656	160024	186477	356664	201267	330864	433052	171019	283970	535445	407495	69432	148212	944010	30590
1532	1-linolenoylglycerol	Lipid	Monoacylglycerol	34393	LC/MS Pos	100001435	5600.8	370.295		53480978	21403134		HMDB11569	609185	437499		612390		712391	235754		97879	155135	386494	630079	154615		386298		217691		735879	734240	417034	199967	87434	199655	94140	415056	281581	325602	99074		136738	345775	186927	72317	305900
1401	1-linolenoylglycerophosphocholine (18:3n3)*	Lipid	Lysolipid	45951	LC/MS Pos	100005350	5506	518.324					HMDB10388	4615508	11107701	6919478	4913214	9053377	11984593	12078626	8917322	19203976	17371958	12492538	2869004	3119979	1778018	13406701	9652031	14198022	17343094	11932854	13758085	13184322	9388673	1890606	11707906	5325547	15953118	12139459	11904305	14599232	17093812	5904386	6307764	4557631	3051458	15055310	12793867
1530	1-linoleoylglycerol (1-monolinolein)	Lipid	Monoacylglycerol	27447	LC/MS Neg	100001040	6477	279.233	2277-28-3	5283469	4446589		HMDB11568	55669820	32673202	11624575	40786232	25764884	35197220	18449344	24929302	32641236	18109730	44495500	33236052	16557210	8532634	34384728	21566112	22535622	10933882	54191128	36693656	40320548	25318930	12942206	22941606	28546392	40658492	30496110	33607416	15021995	11108652	23733290	46258524	24662814	15714440	65253064	14402647
1399	1-linoleoylglycerophosphocholine (18:2n6)	Lipid	Lysolipid	34419	LC/MS Pos	100001395	5575.9	520.34		11988421	10160888	C04100	HMDB10386	440747008	667846208	526036800	538365184	594194752	576159744	595316672	451667456	663454912	493812672	617035072	451372128	437816896	335100928	538312704	410371648	528821056	702068288	555868288	625104512	600003584	503585216	314906144	526036800	472292032	572418752	567015680	490884576	506541152	640040192	451551584	523252512	466407232	404251232	492286240	513909632
1436	1-linoleoylglycerophosphoethanolamine*	Lipid	Lysolipid	32635	LC/MS Neg	100001570	5900	476.278		52925130	21403170		HMDB11507	3684189	8898933	4811722	6816667	7214909	5696414	7365687	6548114	9856599	8818660	6244053	4236073	4387604	2424027	9655963	4712738	7697628	6962926	5926264	7285165	7476899	6588026	4319133	8501203	5848367	10268341	7090986	10398208	8074123	7523648	7341352	6046225	5165512	3932090	7402909	9627212
1457	1-linoleoylglycerophosphoinositol*	Lipid	Lysolipid	36594	LC/MS Neg	100001778	5494	595.289						339610	337838	138899	263259	315356	127184	176277	196214	62037	188658	301460	113602	401618	104867	392664	119978	139609	53525	182756	52874	398903	367915	183073	448031	180565	256668	207835	262542	230606	180565	319491	309724	153010	143005	739569	83269
1466	1-linoleoylglycerophosphoserine*	Lipid	Lysolipid	43676	LC/MS Neg	100004606	5500	520.268						1163968	1193217	831988	1187274	1512455	1155327	1146223	1627584	1329929	1634719	1183691	625405	896983	472870	1387520	1035625	1557549	1085102	1148096	1206746	1702180	823551	793882	1644091	1205385	2488364	1409374	1865398	1766614	1433455	1407938	1394967	1028961	841672	1560896	1565026
53	1-methylhistidine	Amino Acid	Histidine Metabolism	30460	LC/MS Neg	100001051	1227	168.078	332-80-9	92105	83153	C01152	HMDB00001	197803	202137	192187	202923	208145	204008	344760	227723	222489	217640	229413	220530	235545	187944	144021	214724	220674	210388	234335	188643	335264	230301	241092	97468	187674	187402	222388	249181	225144	250540	246956	248478	243695	231182	347704	207256
68	1-methylimidazoleacetate	Amino Acid	Histidine Metabolism	32350	LC/MS Pos	100001208	833	141.066	2625-49-2	75810	68319	C05828	HMDB02820	1498008	2930965	2629948	3042154	1881053	2043666	1123800	1830671	1550424	498727	1358433	889153	1220749	2419557	3214559	228892	1918746	1313130	2116514	2596877	3273738	4795789	4989846	934561	1067788	2226256	2008668	2585940	1795908	3357185	3300963	1590846	1513460	590678	5850051	1911743
2411	1-methylnicotinamide	Cofactors and Vitamins	Nicotinate and Nicotinamide Metabolism	27665	LC/MS Pos	55	691.3	137.071	1005-24-9	10129985	8305504	C02918	HMDB00699	11526844	10603083	9165873	7736911	9503957	7976276	7520360	9134310	5192388	8677063	7556268	8827966	8720235	16077980	8734061	8169461	9025025	9504304	10388446	8174602	9071333	9360642	9200562	7718518	8654080	8608087	6178151	7859244	8362074	7351360	9353621	9013529	9249333	9413038	10494605	6788027
2566	1-methylurate	Xenobiotics	Xanthine Metabolism	34395	LC/MS Neg	100001400	1099	181.037	708-79-2	69726	62926	C16359	HMDB03099	2044469	1844414	1989517	1797430	1974664	1003867	1122984	1512849	584025	1200651	2309196	2409048	2363307	2552242	2209574	1054066	1427752	923336	871242	897088	2155872	2340029	2319385	1979053	2050707	1163484	917309	812894	1532246	811447	1547136	2036371	2028161	2235102	2090408	1146102
1528	1-oleoylglycerol (1-monoolein)	Lipid	Monoacylglycerol	21184	LC/MS Pos	100000924	5820.4	374.326	111-03-5	5283468	4446588		HMDB11567+N67	9312644	4843639	2147421	6579777	5248101	3461319	3023163	1202632	5992391	2502544	4832263	6468737	3922612	7474573	3568367	2799634	3021586	2882284	13230427	10218531	9968069	7637220	3737962	2538846	4222224	5389435	3382991	3945938	3610907	2391471	4347259	8005051	4459811	2022773	4889657	5824108
1396	1-oleoylglycerophosphocholine (18:1)	Lipid	Lysolipid	48258	LC/MS Pos	100001272	5700	522.355	19420-56-5	16081932	17240641		HMDB02815	365029472	294790464	337175616	320630880	313091520	186251184	320497600	203645824	235651328	218723584	381458816	472273248	340926272	599268160	360906368	208062240	284858592	479505888	339052096	425442048	469901088	434238880	294211648	311330816	301313792	227693088	227686448	210907344	301007648	350795712	205945392	389025440	366113600	326601408	344397504	346712480
1432	1-oleoylglycerophosphoethanolamine	Lipid	Lysolipid	35628	LC/MS Neg	100001569	6125.1	478.294	89576-29-4	9547071	7826021		HMDB11506	18365246	30786236	30118774	35920304	38209008	26977698	24993446	32029958	32022496	21990972	19128518	29342948	29600908	21551618	21706558	14236457	26519600	27804736	28544886	27416014	26849140	24171494	33738056	25842338	40959408	48307760	30739398	42053376	28052924	38246900	39325424	28683058	31125406	25882412	35488072	55584360
1479	1-oleoylglycerophosphoglycerol*	Lipid	Lysolipid	45968	LC/MS Neg	100005716	5610	509.288							283195	157054	80916		355822			358901	142198	156939	977244				59471	113283	284129	61285				669288	375424					186916	173096	304003		29987	64905	739918	70345
1455	1-oleoylglycerophosphoinositol*	Lipid	Lysolipid	36602	LC/MS Neg	100001777	5599	597.305						804116	944412	827994	978770	1248644	505517	677328	900476	378988	733910	869002	637627	1256860	653327	528133	525222	634304	540425	451940	481234	929448	930688	966453	1294521	1321488	1347502	562893	1105357	1019016	588745	948751	1074109	916877	849901	1144130	1144038
1464	1-oleoylglycerophosphoserine	Lipid	Lysolipid	19260	LC/MS Neg	100000630	5607	522.284		9547099	7826049			7982108	7729599	7623419	9710842	14059450	2259756	6670147	10838973	4827755	7768259	8034343	5773916	9816342	6756953	6859016	6679426	8973563	5082727	5563989	5718317	9937430	7690381	5371830	10240090	12682715	10777570	5187044	10777373	9817017	5917710	9172062	10317247	8162084	6634567	10830441	8142340
1424	1-oleoylplasmenylethanolamine*	Lipid	Lysolipid	44621	LC/MS Neg	100005372	6250	462.299						13974318	18509432	16205965	16676908	21604932	16139304	12826512	16103008	20774774	14005007	13761476	17895478	17280002	13947353	6432134	9790142	14211695	11420943	13394719	14428210	22520594	17550970	20918720	20034634	24745614	32184108	21879538	25913024	22639294	25792396	23030276	19340188	20108106	20858250	23642718	39948916
1390	1-palmitoleoylglycerophosphocholine (16:1)*	Lipid	Lysolipid	33230	LC/MS Pos	100001511	5525	494.324		24779461	21403152		HMDB10383	84042024	97612680	104123600	100127680	87695000	35476884	51325044	29231964	50282164	31303760	74392040	123239224	94266984	138755696	60742808	22925032	41293728	50432516	43534372	44922332	97535272	88954160	93936496	60863100	99319736	50746884	49449416	43277712	41458620	60743152	69400248	80503024	78873368	78372320	71096360	55728460
1523	1-palmitoylglycerol (1-monopalmitin)	Lipid	Monoacylglycerol	21127	LC/MS Neg	100000827	6400	255.233	542-44-9	14900	14201		HMDB31074	52652168	33595796	45179184	50271820	45433548	66023804	55468632	47437184	55613872	18959882	33344250	63057352	31374302	41629868	62349180	23163496	20608138	24583654	86718008	41115560	32502346	31963640	30684964	22514962	57908404	38123124	45206068	49097972	14814930	33400632	48174444	31934976	41184908	35627176	32761796	27096164
1388	1-palmitoylglycerophosphocholine (16:0)	Lipid	Lysolipid	33955	LC/MS Pos	100001263	5670	496.34	17364-16-8	86554	78064		HMDB10382	1219835648	1088361984	1192371328	1112452352	1094092544	826825088	1108101760	850387584	875604288	911328576	1214002176	1434097536	1254283648	1493943040	1135557376	828720768	914336384	1287542912	1085786752	1122322944	1321857536	1186012544	984015232	1143030144	1051641536	903522944	874496832	808600832	937640064	1136570240	870654720	1166836608	1218619008	1155438080	1056681792	1038711232
1427	1-palmitoylglycerophosphoethanolamine	Lipid	Lysolipid	35631	LC/MS Neg	100001567	6057.2	452.278		9547069	7826019		HMDB11503	12976463	21979072	20167230	28463916	24300164	13987017	23609014	13172732	18177336	16218060	12376976	20186026	19050570	15189204	21474418	8001080	12765204	15523984	16502500	15702892	14979092	15057251	21501358	18079100	29493948	27920544	18242650	21194722	13512503	20046816	24749732	19297180	19404662	17752458	23710214	29559920
1474	1-palmitoylglycerophosphoglycerol*	Lipid	Lysolipid	45970	LC/MS Neg	100005717	5570	483.273		3300276	2548639			140325	135858	136564	142231	139655	63657	89635				83820	266718	199100	143010	267827		33025	49453	58359	68314	164005	167748	228989	207030	116854	54137	145570	56057	61096	96112	225176	104431	74214	130440	164762
1450	1-palmitoylglycerophosphoinositol*	Lipid	Lysolipid	35305	LC/MS Neg	100001655	5564	571.289						1437534	1446702	1130981	1763856	1744440	410192	1127479	1214037	325575	633519	1067656	870865	1595334	1320041	1482065	900779	1234000	597550	934111	784411	1775420	1414315	759823	1993797	2493044	1764652	787041	1297426	1692331	717575	1624855	1859110	1337687	1362988	1858863	1487662
1476	1-palmitoylglycerophosphoserine*	Lipid	Lysolipid	46130	LC/MS Neg	100005805	5572	496.268		9547100	7826050			1891131	1886008	1809457	2143811	2920716	117158	1056593	1381551	362031	1088435	1781164	539287	2537181	1284628	1838928	854182	1166317	394953	788633	477742	2269110	1607292	571829	2357901	2914177	1536311	498878	1205839	1513119	427323	1866391	1903577	2243700	1663280	2241722	594239
1422	1-palmitoylplasmenylethanolamine*	Lipid	Lysolipid	39270	LC/MS Neg	100003000	6285	436.283			10471193			7745583	12727260	11132479	11954169	16107234	8810605	7646954	8102828	11117855	6621430	8178738	10784350	10736343	7841919	3914097	4341697	7914235	5870190	8359684	7961881	11559173	9413757	11998041	10663745	21377006	17073410	10603785	11190315	11149169	13355562	17281430	14137539	13119869	14091508	15734642	23110900
1526	1-stearoylglycerol (1-monostearin)	Lipid	Monoacylglycerol	21188	LC/MS Pos	100000932	6042	376.342	123-94-4;31566-31-1	24699	23095	D01947	HMDB31075	5630015	6877267	15126868	18187414	20569796	5042333	17168180	2592814	5411263	1542917	5606158	7914783	6021265	33803124	3207129	3540194	4114206	36933312	110148984	10863982	17440050	17087166	3540194	3286131	16676322	5540050	2157399	9790953	2871039	7775575	3669297	3496550	3605209	2617396	5318788	17598420
1394	1-stearoylglycerophosphocholine (18:0)	Lipid	Lysolipid	33961	LC/MS Pos	100001271	5847	524.371	19420-57-6	497299	435389		HMDB10384	290305568	1019456128	1113429120	967755584	1011964544	356644768	1234399360	249228432	478758688	212548960	326717792	516490592	299498688	1386106496	231117712	247088304	241056112	1341106432	1118749056	1224350720	1194373120	967294272	449968192	234587216	887096768	839127680	546793024	957694272	281600992	584518208	663818368	310501216	347421312	276712192	285558272	945174784
1430	1-stearoylglycerophosphoethanolamine	Lipid	Lysolipid	42398	LC/MS Neg	100001461	6514	480.31	69747-55-3	9547068	7826018		HMDB11130	22699288	33303106	29489602	30316988	28098244	31730542	31055022	22636920	30704414	24179396	23872446	27932638	28023990	24421212	22820398	17347940	24508604	23458412	24977144	23560298	25557972	29365308	27691060	30845162	31542176	46818376	35502168	32820344	30808490	32654764	26177454	30266742	30539300	28153264	38511656	45217348
1453	1-stearoylglycerophosphoinositol	Lipid	Lysolipid	19324	LC/MS Neg	100000656	5794.3	599.32	796963-93-4		21403067			2344919	3520237	3004262	4237201	4899925	2475698	2964715	2281704	2498714	2572629	1774575	2331631	2910479	2411882	2073675	1243909	1636042	2332792	1794815	2484737	2028485	2547390	3628956	3569073	5022750	5961941	3343838	4566038	2998359	3413003	3114729	2470182	3016512	2208955	3172957	4325329
1463	1-stearoylglycerophosphoserine*	Lipid	Lysolipid	45966	LC/MS Neg	100004327	5800	524.299		9547101	7826051			12127454	18677196	16530764	20319470	21552906	18943016	20326090	15853350	17221066	18805166	11974571	13348463	15173665	8929253	12332552	9940637	12052296	14883253	14599691	17557602	14910264	12886739	14213242	20934374	22129526	29684852	20419260	23542740	19766336	19857684	18777590	15192662	16312522	11616033	20458608	16479320
1423	1-stearoylplasmenylethanolamine*	Lipid	Lysolipid	39271	LC/MS Neg	100003001	6500	464.315						3521441	4207916	3804526	4256227	4924669	3248743	3839326	3298338	4027476	3325643	3279551	4727443	4162351	3125317	1224386	2349229	3487441	2563825	2558372	3110478	4816178	5945804	4649517	5424496	7141408	7855206	7206914	6005774	6366859	6145095	4142922	5056382	4211372	5016614	5304976	7314987
984	10-heptadecenoate (17:1n7)	Lipid	Long Chain Fatty Acid	33971	LC/MS Neg	100001278	5555	267.233	29743-97-3	5312435	4471860			81748696	33975552	30887336	52789388	50649108	49123372	27523474	27764246	62669096	27473760	64100732	85622088	65833396	58317832	72044032	33341048	25906798	35368636	36894024	44419784	76100384	56498872	124751640	42576140	68891120	36474600	54853960	39636232	24275356	46125476	45889512	65543796	54987320	67834496	59692392	39983056
1243	10-hydroxystearate	Lipid	Fatty Acid, Monohydroxy	47123	LC/MS Neg	100005852	5370	299.259		9561835	7838048			13362730	7319209	19729910	10131024	6159605	85739592	49537376	18925784	592430016	83951968	13452211	6698505	9682688	10697226	62725652	11935277	13646779	10503538	15650576	80902816	8250939	23649062	9595803	4322082	20196498	158280096	11402047	14069290	11605282	138622032	7026652	28819776	10835845	9934966	12092499	33001764
994	10-nonadecenoate (19:1n9)	Lipid	Long Chain Fatty Acid	33972	LC/MS Neg	100001277	5780	295.264	73033-09-7	5312513	4471938		HMDB13622	20289462	8493759	8246398	13978045	13587418	5973158	4512612	5909092	6142607	5270992	13591874	12472036	20485172	14968168	17659000	6468700	4750199	3005853	8699072	4070536	15869284	13718863	17303834	8007726	17545958	6542948	4888811	9847949	3974676	3386896	6639713	16808066	13896065	17559180	16343404	5350889
973	10-undecenoate (11:1n1)	Lipid	Medium Chain Fatty Acid	32497	LC/MS Neg	100001197	5085.8	183.139	1333-28-4		10771160			213456	171041	177313	199815	202112	266826	402565	360113	716636	272091	437247	294177	246406	303820	653380	323930	248528	272926	146481	288965	342700	255496	259891	181248	248113	134834	309097	277699	299161	517711	270619	561041	394763	648304	365868	1700272
1248	12,13-DiHOME	Lipid	Fatty Acid, Dihydroxy	38395	LC/MS Neg	62	5137	313.238	263399-35-5	10236635	8412123	C14829	HMDB04705	2536339	1381127	2336533	2648192	1809958	2788783	3379046	2555789	6549718	5950430	3212108	2235031	1557026	2565131	10660794	1205777	511450	1739598	4067195	3039120	1890925	4302476	2031407	1868115	2421198	1235919	2919384	4956212	1876404	2118163	2161890	3106999	4390425	5608599	4189490	3555248
1319	12-HETE	Lipid	Eicosanoid	37536	LC/MS Neg	100002167	5326	319.228	71030-37-0;73837-14-6	5312983	21509475		HMDB06111	978744640	329632256	352948576	791429568	693456896	33975828	49310660	188648608	51568716	55718604	388683136	665531456	565924096	869534272	536416288	39156444	67777368	59606720	55523228	84364104	451610304	431988576	913926144	304536992	811676544	133932552	119189904	159019920	120684568	128464008	507579296	729915520	639005120	744197376	399928544	418945920
1238	13-HODE + 9-HODE	Lipid	Fatty Acid, Monohydroxy	37752	LC/MS Neg	100002196	5275	295.228		43013				407102976	69910080	78387632	331190816	129460872	10225685	7806138	13303652	17608440	9248017	73947608	213755920	147539152	352762688	233306768	5915444	6786469	5479452	8773191	12051077	64279352	110165720	187245280	45785496	261078880	20953188	14748173	21550914	9170096	10714080	64681804	174301968	114314880	208076144	57705516	25623650
1245	13-HOTrE	Lipid	Fatty Acid, Monohydroxy	46109	LC/MS Neg	100002836	5220	293.212	74784-20-6		10784491			69757296	6201633	6780248	42193572	13768019	775988	728608	941777	967597	756943	9274562	33236792	19931390	49071736	34761972	677466	314086	588779	942487	917261	7468925	12002113	23739590	4227843	28617256	1253771	858524	1282109	502408	389544	6702279	12659512	10723436	24093852	4195872	1476326
1312	15-HEPE	Lipid	Eicosanoid	46296	LC/MS Neg	100002136	5245	317.212	88852-33-9	16061131	17220814		HMDB10209	8661059	1463740	1943339	5545762	4417763	388856	439203	523013	506987	266012	3824317	5182371	6174418	6255796	4744615	448743	475143	364987	724077	283108	4438253	3533998	8036186	1558500	4874847	422013	566951	424200	2128649	841176	3596226	4614401	4721139	5114566	2938347	1044606
1320	15-HETE	Lipid	Eicosanoid	37538	LC/MS Neg	100000565	5298	319.228	54845-95-3	5280724	4444307	C04742	HMDB02110	85289224	23207280	28908730	78089528	62765776			9211162	2563824		26999490	60866656	48494732	71221960	53521992	1494553				3019471	28143598	30265248	71960792	25793932	70737184		4823444	5866550			34723412	51104452	45106768	56408156	23207280	7493634
1072	15-methylpalmitate (isobar with 2-methylpalmitate)	Lipid	Fatty Acid, Branched	38768	LC/MS Neg	100002945	5695	269.249		17903417			HMDB61709	30106632	20838852	16335067	31149106	31896512	28453336	14172285	19517818	37297136	21988672	23449550	36484680	40521308	21094890	44368132	12281220	23990220	14875520	29130484	19084994	24488818	45720096	47453828	18207528	52216116	21900444	21810028	17837220	12782436	19033158	19391596	25107676	31512954	44894724	32065338	19884478
1234	17-HDoHe	Lipid	Fatty Acid, Monohydroxy	48855	LC/MS Neg	100002169	5295	343.228	90780-52-2	6439179	4943608		HMDB10213	106875328	25439822	26960140	74680392	70633736	2685571	2864782	12135104	3391753	2756888	36700092	60266480	57754136	74745536	82431840	2729011	3254819	3344870	4584517	3832808	42009192	37530036	86681288	27450590	80185304	7920993	8919593	11863045	5459099	8970898	37787048	64869280	56633432	65875748	26845840	16670888
1075	17-methylstearate	Lipid	Fatty Acid, Branched	38296	LC/MS Neg	100002356	5993	297.28	2724-59-6	3083779	2340933		HMDB61710	4566772	2369250	2238557	3539944	2798957	2539703	2747299	2677426	3954124	3084772	3308442	2991438	4244779	2641524	3065531	3381147	2184967	1962028	2453618	3664806	3742764	3674758	3991131	2623906	3810229	4069002	4638219	4959436	2728529	3300710	2908291	4681453	3580111	3920309	3653689	1603929
2672	1H-quinolin-2-one	Xenobiotics	Food Component/Plant	40464	LC/MS Pos	100002385	3522	146.06	59-31-4	6038	5816	C06415		3702519	3808716	3793842	4301904	3341717	6649757	2615410	2762715	3680576	2985507	4168641	3818316	3549921	5056377	4608686	2835071	3179556	4162341	3747103	3570932	2356631	3270755	3639537	3341717	3652069	2569873	3899825	3601584	2720183	2711490	3280057	2990820	2677715	2378143	2552081	3033758
2383	2'-deoxycytidine	Nucleotide	Pyrimidine Metabolism, Cytidine containing	15949	LC/MS Neg	100000125	1492.2	226.083	951-77-9	13711	13117	C00881	HMDB00014	59297084	57798748	60142764	57005572	59506988	50182272	52130360	45297416	59647080	48775800	62611320	60793400	63445800	57814112	63152932	53615348	47152028	50122952	52832368	50298400	69135064	57431572	63007464	57722108	58265028	50789720	48287428	49379116	52553640	57745768	60798220	64268096	65949824	62540020	74823376	45084624
2362	2'-deoxyuridine	Nucleotide	Pyrimidine Metabolism, Uracil containing	1412	LC/MS Pos	536	1626.9	229.082	951-78-0	13712	13118	C00526	HMDB00012	3306351	4001791	4035650	3772476	3650725	1907789	2609521	2133416	3063252	2221807	3786167	3901815	2987561	3426087	3423256	2560964	2139951	2179675	2989833	2200051	3842087	4361368	2943026	3773687	4323570	2648192	3525329	4076536	3724343	4199958	3114580	3894145	3236955	3953524	3170493	2558084
2673	2,3-dihydroxyisovalerate	Xenobiotics	Food Component/Plant	38276	LC/MS Polar	100002417	1050	133.051	1756-18-9	677	657	C04039	HMDB12141	16223941	17310936	11556404	21499090	12215394	14396822	10941622	7071253	10075693	9954324	9827011	15328896	9954324	9678314	14542153	7267970	8497790	6945656	6625672	16135294	6126904	15058247	9413059	10459658	15584523	15077704	14401505	10380984	9819628	1445026	10498733	10089020	8126114	15531135	10203550	2117784
769	2,3-diphosphoglycerate	Carbohydrate	Glycolysis, Gluconeogenesis, and Pyruvate Metabolism	15664	LC/MS Neg	1227	555	264.952	102783-53-9	186004	161681	C01159	HMDB01294	165684656	119761400	113352120	128719488	102743016	142305904	126253672	91475400	125879160	137191024	186932752	138527264	123437976	113402368	194861984	132450672	115350296	94605432	161652864	102067416	170990976	104221992	140446448	136468224	136089440	132604232	153269264	127156984	107127816	106700536	177207168	183926656	143003360	168220528	177376160	78917792
2676	2,8-quinolinediol	Xenobiotics	Food Component/Plant	42975	LC/MS Pos	100004206	3314	162.055	15450-76-7	97250	87777	C06342		37520	29762	66106	103889	18917	42054		22835		15653	53936	399381	66917		73274			83825	15401		82864	75324		122237			24805	51855	104733	76907	64798	29306	66283	144948		11531
77	2-aminoadipate	Amino Acid	Lysine Metabolism	6146	LC/MS Pos	381	793.3	162.076	542-32-5;1118-90-7	469	456	C00956	HMDB00510	5125237	5100482	6166603	5448446	4273193	3978879	3640960	3874887	2923059	4274160	6195912	4520772	5074914	4843250	3880452	2132433	4115197	4055684	2758265	3099806	4622825	5557180	4656306	5632308	4248666	2686611	3039712	3785303	5185045	3693410	3751899	4230991	3260326	4855590	4482975	2667129
299	2-aminobutyrate	Amino Acid	Methionine, Cysteine, SAM and Taurine Metabolism	42374	LC/MS Pos	1128	766.7	104.071	1492-24-6	439691	388757	C02261	HMDB00650	12129954	11981323	14907225	14785853	13319745	8169768	10848951	9077570	7450078	10494870	12904146	14626814	15758485	18039366	15511078	5836180	9661618	8944163	9447151	6917252	16846870	16616168	15826257	14158851	13203777	11633377	9147403	13456472	12285684	18567962	14623601	16216301	14774640	15851848	28351088	11322586
1139	2-aminoheptanoate	Lipid	Fatty Acid, Amino	43761	LC/MS Pos	100004542	2530	146.118	1115-90-8	227939	198338			4502950	5277539	4936539	4908139	3596362	3119938	2196932	2943862	3784900	3709535	3920445	5605694	4058120	4518744	5819434	1948889	2812848	2781276	2943862	3311115	3566153	5330912	4108919	4606240	4706413	2920478	2674890	3771028	2566395	1692090	3295935	4057792	3038032	4971202	3707659	2053355
1144	2-aminooctanoate	Lipid	Fatty Acid, Amino	43343	LC/MS Pos	100004227	3355	160.133	644-90-6	69522	62727		HMDB00991	1541172	1496991	579405	1205548	1635122	424521	1672322	921887	2136904	1846942	1338001	1799561	763790	1071802	1638378	296713	1595338		1828192	1203820	574119	2034465	1318786	1813424	1631121	704414	1092074		1470906	1606896	105985	1931777	762681	1610898	1194409	406236
3249	2-aminophenol sulfate	Xenobiotics	Chemical	43266	LC/MS Neg	100004322	1677	188.002		181670	158022		HMDB61116	9838411	8659948	10668903	10346833	8939146	8403536	6576851	7162520	9982493	6209273	10529281	7592595	8010758	7045817	7685193	4423561	7312012	6197148	8655537	6169312	6546894	5873182	6664832	9880524	6546087	6669164	5984187	5343858	5495199	3177716	5824647	9340419	5009775	7868248	8231827	4623284
1534	2-arachidonoyl glycerol	Lipid	Monoacylglycerol	19266	LC/MS Neg	100000584	6170	303.233	53847-30-6	5282280	4445451	C13856	HMDB04666	589079	219078	402900	518238	345537	495471	698795	2601472	507470	694935	799081	721429	135386	287122	629472	391913	609310	538551	492100	484673	487837	410741	165743	387969	624029	621053	374402	591596	419613	343441	546901	596852	301092	221366	1188184
271	2-hydroxy-3-methylvalerate	Amino Acid	Leucine, Isoleucine and Valine Metabolism	36746	LC/MS Neg	100001541	1800	131.071	488-15-3	164623	144317		HMDB00317	1155298	1899706	1860176	1421595	1966921	2039409	1152835	1741665	1958289	581286	1179484	1300014	1540795	1502596	1557370	643669	1290277	1811924	2337644	1505354	1327459	1988019	1419240	2127328	1320518	1998883	1007172	1127684	1031801	1127869	1376681	2030290	1671701	1244732	1541408	1513242
1089	2-hydroxyadipate	Lipid	Fatty Acid, Dicarboxylate	31934	LC/MS Polar	100001153	3000	161.046	18294-85-4	193530	167943	C02360	HMDB00321		8144696	7773874	8295389	6496292	13392306	6039070	4144829	6413422			8850451	4111162	3453927		1083849	2851703	8317534	4854827	7406570		2941600	6985511		6092134	10735141	3824933	3710321		3901763	5534395			1158207
300	2-hydroxybutyrate (AHB)	Amino Acid	Methionine, Cysteine, SAM and Taurine Metabolism	21044	GC/MS	100000933	1169.4	131	3347-90-8	440864	389701	C05984	HMDB00008	1548510	1402410	1928740	1107708	1534422	1350821	1278329	1820586	953260	1529958	1708007	1118858	1948245	1767140	1144615	735143	2026120	1887280	1146431	1291814	1943532	1442991	2075533	1413588	1070494	1579435	1000637	1452171	2026474	1728461	1222846	1634336	1585628	1404452	2174792	1075374
1212	2-hydroxydecanoate	Lipid	Fatty Acid, Monohydroxy	42489	LC/MS Neg	100004089	4840	187.134	5393-81-7	21488	20195			728883	978567	999846	686085	545073	4382745	7126570	4066506	46925496	4933891	1513737	493194	1414209	846963	1718971	1142015	892777	779654	710563	2642613	1107880	1917770	1035576	673155	1909243	5677883	1549634	1369373	1689007	15794512	911144	2140845	1300000	1915110	1452921	1090682
1086	2-hydroxyglutarate	Lipid	Fatty Acid, Dicarboxylate	37253	LC/MS Pos	100002070	1265	131.034	40951-21-1	43	42	C02630	HMDB00606	1032534	1129615	1017192	1369514	918842	783657	664403	632380	747075	594817	921972	1340259	680667	1260730	1283950	655766	503625	847444	805777	581080	965655	801033	1150154	886291	996378	427277	397504	566684	520258	475980	949324	1054023	613066	700360	515667	329883
2505	2-hydroxyhippurate (salicylurate)	Xenobiotics	Benzoate Metabolism	18281	LC/MS Neg	1869	2184	194.046	487-54-7	10253	9835	C07588	HMDB00840	177589	199348	204426	176392	139163	166712	134979	82149		97467	157318	204251	100041	182914	73190	63826	158220	165249	206476	84836	91261	100836	204557	121715	128698	177399	51135	104361	148925		123303	117320		83794	225772	121557
3270	2-hydroxyisobutyrate	Xenobiotics	Chemical	22030	GC/MS	100000748	1107.5	130.9	594-61-6	11671	11181		HMDB00729	353939	375855		267257	392385	646620	738171	615445	1010855	789524	423719		353852	304966	331168	430793	687512	615649	384877	448746	346526			503874	247080	803217	563885	633190	637988	660939	310561	328063	327337		470361	450913
1211	2-hydroxyoctanoate	Lipid	Fatty Acid, Monohydroxy	22036	LC/MS Neg	100000743	3736.8	159.103	617-73-2	94180	84994		HMDB02264	228032	178950	226107	268604	193248	566836	334227	460021	786799	365618	431286	92178	359790	261668	66699	253785	239946	190482	123355	280078	274723	368716	239768	158784	250267	203174	189478	155421	287028	456792	156582	118877	251116	348515	247831	2100357
1214	2-hydroxypalmitate	Lipid	Fatty Acid, Monohydroxy	35675	LC/MS Neg	100001579	5511.2	271.228	764-67-0	92836	83805		HMDB31057	16184137	16096162	11619938	17138342	14537994	11124001	14434885	11124001	18322344	8526210	18208400	16791124	16365600	17538368	17515246	14277760	8779812	7954064	8843754	9298527	17366604	18454100	12851563	15064145	17693118	13438868	13876528	13214093	8109999	12670520	17337204	20567480	19006324	23497744	15426680	11444872
1215	2-hydroxystearate	Lipid	Fatty Acid, Monohydroxy	17945	LC/MS Neg	1239	5695	299.259	629-22-1	69417	62625	C03045		2761158	2773060	2071929	3218130	2343230	2489911	3102089	2412341	3371288	2953190	2662614	2377314	2683230	2662835	3458587	2790406	2277841	1493110	2001785	1988335	2550399	2734473	2455923	2864804	3090555	3669726	3065286	3092070	2172899	2310637	2449914	3102845	2793029	3410938	3205980	5202342
2679	2-isopropylmalate	Xenobiotics	Food Component/Plant	15667	LC/MS Neg	100000409	725	175.061	3237-44-3	77	76	C02504	HMDB00402	7185054	7220042	9269655	12281421	11257691	13573003	7465320	6122582	5632992	10104205	5064087	9854558	5829499	7519476	6829283	3925411	7284158	11975629	7287231	7440547	4800951	6727493	8435496	7575429	9376300	8120255	5626897	5114487	6149094	4249757	4609284	4647910	4249271	3420577	6202601	3889335
1531	2-linoleoylglycerol (2-monolinolein)	Lipid	Monoacylglycerol	32506	LC/MS Neg	100000987	6250	279.233	3443-82-1	5365676	4517636		HMDB11538	26547144	17432340	8846250	26246844	30280378	15561936	6133406	8037691	9106180	6661077	25913820	29542098	16458835	6470266	21875964	8012682	13604641	4576100	21196040	13487946	19244556	20157614	14080417	13546293	23586374	13733014	9197704	11976136	7064079	3468331	10858314	20100908	19395330	8094779	36535704	5137749
266	2-methylbutyrylcarnitine (C5)	Amino Acid	Leucine, Isoleucine and Valine Metabolism	45095	LC/MS Pos	100001509	2465	246.17	31023-25-3	6426901	4932320		HMDB00378	31836532	26288062	33663552	36310832	30842274	39849080	27580084	24292980	20179180	31850734	30914732	35873020	31183644	37129572	35110476	14116812	34471280	46087496	38833144	22092212	27917168	28960972	37866388	39129944	41365676	16166507	18286596	18335908	29326174	21941168	27905868	28838478	28612324	27451836	24000454	18212534
267	2-methylbutyrylglycine	Amino Acid	Leucine, Isoleucine and Valine Metabolism	31928	LC/MS Pos	100001155	2582.2	160.097	52320-67-9	193872	168243		HMDB00339		2567420	5058783	2320610	4233286	2546333	2718742	2408405	1411035	1965717	3448597	5696034	5665865	7662012	3356865	834559	2241700	3091578	2445221	1939964	3321921	3806525	5556946	3845784	4523175	1401920	929131	1182778	1859699	1158498	3521616	2770548	3085812	2402349	3717158	1161795
1154	2-methylmalonyl carnitine	Lipid	Fatty Acid Synthesis	35482	LC/MS Pos	100001596	1552.7	262.129	149181-64-6	53481628	21403178		HMDB13133	1003439	820514	936059	893272	863589	823493	853167	615916	766510	818734	773547	782634	661410	763691	747347	670693	716771	658312	812000	602521	862855	797439	801527	891854	787302	655063	685713	769795	746120	728924	798586	790460	727788	727919	926271	688746
1529	2-oleoylglycerol (2-monoolein)	Lipid	Monoacylglycerol	21232	LC/MS Pos	100000943	5821.7	374.326	3443-84-3	5319879	4478086		HMDB11537	6128834	3783710	2105098	5042448	6066350	2342552	1519277	1248696	2110182	897030	7840404	6503003	3612030	6013177	2669182	980398	2912116	2821739	15548561	5501006	16282386	9372301	3338385	2408545	5566903	4402701	911997	1794273	1737998	1139685	4482770	3845608	4406386	1792765	3575782	5498910
2680	2-oxindole-3-acetate	Xenobiotics	Food Component/Plant	40479	LC/MS Pos	100003109	3208	192.066	2971-31-5	3080590	2338343			1112534	928033	1029846	1089697	1288084	1219796	1196326	730031	2119006	1273185	1414158	1726091	937824	1851927	1593425	417858	903364	1455371	1121795	998886	1580316	1400693	1220969	1387411	1386052	1432993	1467718	856650	1301491	1677975	1137579	1987165	1451131	1136957	923837	1068566
3236	2-oxo-1-pyrrolidinepropionate	Xenobiotics	Chemical	40452	LC/MS Pos	100003265	2084	158.081	77191-38-9	3146688	2398914			387125	288781	307797	323787	257476	455732	370379	226513	197280	362125	425949	471177	287849	326719	312111	275513	305902	390342	277160	280881	446713	311630	466883	364367	372192	371098	371237	267790	322435	303185	387799	385254	429591	365606	361238	252423
1391	2-palmitoleoylglycerophosphocholine*	Lipid	Lysolipid	35819	LC/MS Pos	100001561	5490	494.324			21403164			6350243	11086759	10777823	10682865	9167547	2647585	8737583	5208275	6918662	2881667	13091566	10742785	11154719	14036463	10694798	4823456	7028359	8471146	6959905	6264582	13030818	9042933	9399442	9878503	10930400	7126044	5927560	4962460	7205420	7782179	10146224	10859045	10583995	9387101	10998449	6142027
1524	2-palmitoylglycerol (2-monopalmitin)	Lipid	Monoacylglycerol	33419	LC/MS Neg	100001048	6628.9	255.233	23470-00-0	123409	110006		HMDB11533	19477972	13734252	8808076	11693000	16480835	8711564	4314364	5401017	12145125	5130709	8560185	18471704	15538054	11612951	16127404	5907440	8829224	7881891	12514054	6633127	10215494	15874918	17051950	9530522	17478966	8142528	2741009	8156231	5145970	2094563	7536933	8965553	8117444	16628428	6330834	7053988
1389	2-palmitoylglycerophosphocholine*	Lipid	Lysolipid	35253	LC/MS Pos	100001562	5610	496.34		15061532	21403165			248180816	242957248	274746432	241766448	219956368	191137136	254963488	162562992	188118592	179472480	259976832	282847520	256422480	312681792	209280880	152133584	164967184	297012864	218613264	240497920	294514048	214977088	192999856	243400288	206745488	220497072	176743072	161573232	205986912	260752192	200510240	244430048	251756464	242187504	227730032	210190800
2587	2-piperidinone	Xenobiotics	Food Component/Plant	43400	LC/MS Pos	100004295	2047	100.076	675-20-7	12665	12144		HMDB11749	20385992	24897788	16254636	18496040	24504980	16794030	7095094	2705617	12206504	14689576	4900036	18566366	10191300	13186284	19645896	2586635	7279631	21344984	13180381	11465546	6862031	11171352	13567426	12101943	17163748	6623045	7952131	11531819	17272908	11435166	10079913	9717196	8405788	10058519	4541561	3409500
3229	2-pyrrolidinone	Xenobiotics	Chemical	31675	LC/MS Pos	100001081	1651.8	86.06	616-45-5	12025	11530		HMDB02039	712184	604133	445438	490631	390701	551905	376720	414812	523041	499396	426886	611396	1452890	692478	2156890	325923	431833	580878	638645	204894	929385	507875	390932	445913	780998	186360	411957	352266	661111	397169	471990	595107	539294	802284	454847	43288
1527	2-stearoylglycerol (2-monostearin)	Lipid	Monoacylglycerol	34059	LC/MS Pos	100001047	5978	376.342	621-61-4	79075	71407		HMDB11535	290658	501333	408449	2113069	959270	336111	1425342	33714	155791		411466	1100302	385393	2397665	399184	240713	313296	1161994	7525882	986134	2132168	1385917	299494	299494	1896848	110600	197589	377371	78659	365307	124885	41963	177039	270731	94096	1611440
1395	2-stearoylglycerophosphocholine*	Lipid	Lysolipid	35255	LC/MS Pos	100001555	5777	524.371		10208382	8383879			95331696	176356000	192198208	133695256	152512416	41836700	250531424	45814288	44753796	83686744	113373144	48651100	60370620	228789600	58565100	98285512	63334908	296690272	302457600	263036000	325464032	149610544	26540674	88347624	106667392	197868928	44444304	167298208	79735104	105331200	141798352	79138136	62574332	64955684	58662040	284335936
1431	2-stearoylglycerophosphoethanolamine*	Lipid	Lysolipid	41220	LC/MS Pos	100003901	5786	482.324			24769218		HMDB11129	913406	2042947	1929326	1677847	1532776	504569	2446441	485918	709482	768461	795761	778612	586278	2265175	661010	747130	673741	2754767	2072825	1974432	2283709	2159289	297385	959330	1444515	2172044	649519	2510227	1049791	1520483	1554932	968116	886439	910516	1137783	2971163
168	3-(3-hydroxyphenyl)propionate	Amino Acid	Phenylalanine and Tyrosine Metabolism	35635	LC/MS Neg	100001624	1980	165.056	621-54-5	91	89	C11457	HMDB00375	1489154	773926	1932106	1030400	4197648	3129591	1740396	755978	1026089	1227466	2772814	3830715	5172106	2505340	4032146	603229	1327080	1876228	1636017	886889	2206652	2024346	1304500	3936453	3874045	2046898	3294779	1530905	1486173	642411	2030488	4537714	3029091	1747507	2495201	785388
119	3-(4-hydroxyphenyl)lactate	Amino Acid	Phenylalanine and Tyrosine Metabolism	32197	LC/MS Neg	240	1379	181.051	6482-98-0	9378	9010	C03672	HMDB00755	15446655	15446665	15671899	16275751	12458116	13002414	11539141	14556365	10155009	15972755	13709173	15893635	15940779	16003365	11853699	8705648	15549502	13348931	10966199	10592027	13606960	15974677	13377303	13038428	12381245	11020791	9454483	9032697	15441428	10006636	9449777	11100720	11202217	11818606	11353533	9966713
169	3-(4-hydroxyphenyl)propionate	Amino Acid	Phenylalanine and Tyrosine Metabolism	39587	LC/MS Neg	100002914	1670	165.056	501-97-3	10394	9965	C01744	HMDB02199	333385	469627	503503	451757	454303	610242	432855	199706	455330	324416	294020	560973	604567	463044	576639	115939	290822	456736	330122	335754	440653	493191	443634	389100	561233	363437	473310	297605	697080	521563	389528	548063	358853	282135	429258	209972
1790	3-dehydrocholate	Lipid	Secondary Bile Acid Metabolism	43835	LC/MS Neg	100001062	5050	405.265	2304-89-4	159655	140376		HMDB00502	32927	286814	311289	319057	248819	40572	261363	60173	521403	174188	430584		24601	78295	246628		410733	606235	251407		124771	308062	225803	273159	209162	262190	11149		790877	764213	48639	384535	353802	782869	224352	629054
272	3-hydroxy-2-ethylpropionate	Amino Acid	Leucine, Isoleucine and Valine Metabolism	32397	LC/MS Neg	100001170	975	117.056	4374-62-3	188979	164207		HMDB00396	1850215	1675153	1662648	1753048	1571759	1369173	1951219	1747746	1934885	1688199	2262442	1593892	1979353	1611143	1486772	1627430	1631419	1297927	1289616	1287550	2061979	1519273	1856699	1856571	1614107	1577542	1488310	1561842	1822890	1928295	1728083	2048089	1899336	1654127	2514320
1578	3-hydroxy-3-methylglutarate	Lipid	Mevalonate Metabolism	531	LC/MS Polar	112	2700	161.046	503-49-1	1662	4573695	C03761	HMDB00355	68736200	92486736	117616672	98359560	107078712	94727456	124361200	101533992	61887308	74766088	112100472	96169200	84757752	67604984	43083604	77807464	61069900	99694648	71198800	79969672	139903440	70731192	125950328	75105160	103772216	86830112	75377792	81032704	91431768	75944392	86625440	105340472	79982192	79580200	115128048	73921992
1207	3-hydroxybutyrate (BHBA)	Lipid	Ketone Bodies	542	LC/MS Polar	254	1443.3	103.04	625-72-9	441	428	C01089	HMDB00357	92010296	67549912	111748104	97470688	110349736	116135904	268303168	336706816	102430168	116750120	186763584	102385616	124137632	102763056	83859432	286628224	137950608	129705632	73136936	129044400	179784096	86981384	172270496	98643144	96833704	216132672	175229776	215152560	135000544	123951808	164677776	329832320	207817776	156864224	334175840	246836368
2932	3-hydroxycinnamate sulfate	Xenobiotics	Food Component/Plant	48409	LC/MS Neg	100006094	1338	242.997	86321-30-4	6443141	4947175			2372799	1618051	2999464	1987147	5938772	3968191	2021009	1080120	1037797	1748283	2788890	5219147	4033389	2415524	3430661	639146	1955723	2857882	2673419	1319688	2302415	2330118	2555953	3750323	4374015	3070021	4547769	2261804	2296122	821429	2307514	5385807	2562926	1599752	2985778	1272255
1219	3-hydroxydecanoate	Lipid	Fatty Acid, Monohydroxy	22053	LC/MS Neg	100000997	4634.7	187.134	5561-87-5	26612	24790		HMDB02203	360906	379136	493654	507667	510960	244651	743748	553651	897775	769088	638659	543863	761487	531150	263324	510293	475615	281915	360989	424819	694495	749272	649932	144721	739535	952229	439038	459565	472897	577731	618305	821221	826555	775524	908078	2194297
2506	3-hydroxyhippurate	Xenobiotics	Benzoate Metabolism	39600	LC/MS Neg	100002122	1687	194.046	1637-75-8	450268	396603		HMDB06116	147081	116423	149827	181520	549904	267620	95005	99536	41398	89500	105540	152507	86561	80069	235005	58870	233022	337308	386752	101966	38292	100729	97128	164127	152973	119719	214245	137560	287514	105105	246872	169931	61791	78695	339664	381747
2690	3-hydroxyindolin-2-one	Xenobiotics	Food Component/Plant	42561	LC/MS Neg	100003823	2695	148.04	61-71-2	6097	5872	C11130		111581	171110	217463	131627	240840	132938	104092	164361	87082	131014	228824	216051	185275	210993	288178	90328	159961	214464	206669	117560	193225	170877	299866	194189	216456	44713	88628	84060	149879	128116	103913	102003	150932	181326	101325	121646
3349	3-hydroxyindolin-2-one sulfate	Xenobiotics	Chemical	48419	LC/MS Neg	100006103	2082	227.997						108705	133685	120172	143548	110399	97372	68627	96569	69817	65885	142719	130111	107380	108702	100784	36881	108318	138460	216094	96174	90258	93730	148275	99974	109878	65131	88113	85792	114113	95434	74253	112526	99582	130971	144496	108041
280	3-hydroxyisobutyrate	Amino Acid	Leucine, Isoleucine and Valine Metabolism	1549	LC/MS Polar	111	1619.1	103.04	2068-83-9	87	10140307	C06001	HMDB00336	42622760	32226692	38426316	40259600	39037004	30475122	39093692		29618078	36491572	46646044	35573516	44341532	36282216	28949724		43060464	34204344	21134198	27647108	43195072	33572824	41301496	36282216	35376728	28859424	31170160	26694406	42918240	35013184	32086226		49074616	44694412		40513108
1218	3-hydroxyoctanoate	Lipid	Fatty Acid, Monohydroxy	22001	LC/MS Neg	100000773	3446	159.103	88930-08-9	26613	24791		HMDB01954		315802	352296	313381	361190		505385	485507	822063	917933	559638	440265	625934	592103	490847	288465	150723	282561	389932	192606	429788	434860	515539	504593	630435	227748	318663	342108	228595	533025	599230	623416	678470	600614	626082	1153754
1216	3-hydroxypropanoate	Lipid	Fatty Acid, Monohydroxy	42103	GC/MS	115	1187.1	177.1	503-66-2	68152	4573601	C01013	HMDB00700	798489	586214	627007	544212	449933	610553	318497	369834	408386	558658	617147	555927	622913	536141	566783	220407	541325	481493	454974	460730	632302	780301	758391	435680	409511	477692	341881	366170	472098	323713	467156	519113	398461	426386	417657	363293
3347	3-hydroxypyridine sulfate	Xenobiotics	Chemical	48448	LC/MS Neg	100006098	1595.5	173.987	1955-23-3		16232314			935981	1056924	1043256	1303201	695629	789226	429710	390398	462537	556785	612726	909550	682520	644987	729144	130034	415724	484549	462013	411415	603612	675405	572964	962992	1095911	353275	542184	461224	905972	391976	424227	895532	584051	382800	1203461	234594
1220	3-hydroxysebacate	Lipid	Fatty Acid, Monohydroxy	31943	LC/MS Neg	100001145	1282.1	217.108	73141-46-5	3017884	2285525		HMDB00350	400736	265822	267009	265725	343452	103634	376033	357207	502278	310252	1128823	355118	527147	496434		111867	315891	301915	65781	239453	708092	447741	478604		325541	115357	229763	219494	369118	244613	551035	661744	438633	515031	738653
198	3-indoxyl sulfate	Amino Acid	Tryptophan Metabolism	27672	LC/MS Neg	100000467	2222.2	212.002	2642-37-7	10258	9840		HMDB00682	126040696	129339936	111013648	115777904	113281216	98668744	77718752	99258104	107836656	120231256	145762528	96716272	120435248	129215384	134617200	58419504	117406904	131636016	149968064	97327328	96725792	123205144	142051472	120435248	130289632	86332480	106204864	99719160	138157840	124391104	74915864	138551520	108151880	137966912	175226336	150025600
139	3-methoxytyrosine	Amino Acid	Phenylalanine and Tyrosine Metabolism	12017	LC/MS Pos	1342	1771	212.092	300-48-1	1670	8948		HMDB01434	4185384	3811844	3597532	4126769	3261217	4689296	3375949	3457488	4237004	4591232	3802988	4344693	3367246	3260010	3748325	2708473	3506310	3440462	3605916	3906199	3907701	4139078	3552811	4602484	3544388	4713645	4471623	4457546	4139007	3677028	3813908	3451351	2708473	2941378	3241005	3677770
277	3-methyl-2-oxobutyrate	Amino Acid	Leucine, Isoleucine and Valine Metabolism	44526	LC/MS Neg	100000936	1465	115.04	3715-29-5	49	48	C00141	HMDB00019	5430578	4107084	5929860	4960760	4922958	1760141	2189562	2284198	2742514	2527084	4937430	5787949	5471464	5266828	3091802	2144257	2550088	1726988	2600003	2053427	3486092	4234479	5611648	3600260	4688164	1004100	2515636	2526649	2383094	3399043	2457603	3674170	3645571	5767870	1940218	3366251
265	3-methyl-2-oxovalerate	Amino Acid	Leucine, Isoleucine and Valine Metabolism	15676	LC/MS Neg	100000036	2064.2	129.056	1460-34-0;51829-07-3	47	46	C00671	HMDB03736	28023080	24466958	33569912	26034982	26648830	10012997	10424012	11276959	14144495	10859435	26977150	29736692	31868746	29291052	22975382	10971433	11082746	9799764	15300263	10353157	21638562	23877860	32060700	21622490	25249072	13045747	15938609	16609004	11704623	24399304	16272604	22706518	21291880	30050952	13196587	16169234
243	3-methylcrotonylglycine	Amino Acid	Leucine, Isoleucine and Valine Metabolism	31940	LC/MS Pos	100001149	2573.6	158.081	33008-07-0	169485	148224		HMDB00459	768830	587075	699679	808818	607535	468045	745936	743641	448074	490253	617556	757261	634762	489926	380153	543890	467426	500298	533474	533011	590346	508409	572623	619364	697727	418390	633643	444256	754276	435317	599076	799456	832224	519836	945024	440607
250	3-methylglutarate	Amino Acid	Leucine, Isoleucine and Valine Metabolism	1557	LC/MS Polar	1122	2832	145.051	626-51-7	12284	11781		HMDB00752	3874536	3552022	6844475	5300282	7563681	5758372	5710621	4365668	2319101	2029770	4153299	6040962	3324328	2724173	3043859	2144865	2754388	9140648	5274334	5045947	2593023	1037307	8249732	2284038	5177327	6520277	3836065	4039497	4334243	3875520	5325642	3499853	2619052	1599494	4383830	2245983
82	3-methylglutarylcarnitine (1)	Amino Acid	Lysine Metabolism	46547	LC/MS Pos	100005849	1870	290.16		128145	113619		HMDB00552	317233	206378	274370	616750	199515	571882	494547	354839	194217	390166	334543	194775	278753	237054	394708	334083	351532	615547	235057	254131	269460	193214	361174	300805	197863	363586	259694	374023	356778	272861	178532	309347	271653	237591	494674	333224
83	3-methylglutarylcarnitine (2)	Amino Acid	Lysine Metabolism	46548	LC/MS Pos	100005850	1960	290.16		128145	113619		HMDB00552				49067		88030	43122			46818						75851		84897					24971				18319	52897
54	3-methylhistidine	Amino Acid	Histidine Metabolism	15677	LC/MS Neg	100000042	906.3	168.078	368-16-1	64969	58494	C01152	HMDB00479	1569627	2244350	2119412	1737563	2060748	2290453	3029873	2958981	3696201	2365912	1350832	1725930	2558463	1980899	1768026	1728159	2869012	2830287	2223257	2506772	1895377	1853054	2355538	1336159	1858562	2191790	2866178	3341036	2665790	3465458	1673589	1716852	2120285	2460833	3000154	1953603
171	3-phenylpropionate (hydrocinnamate)	Amino Acid	Phenylalanine and Tyrosine Metabolism	15749	LC/MS Neg	100000010	2860	149.061	501-52-0	107	10181339	C05629	HMDB00764	7012885	7007758	5179260	4899626	4769492	5823310	5399902	5165282	7546480	3988394	14855310	11180848	9685784	17044662	16328198	2371555	4366822	5560244	5361023	4777253	9082264	7167422	8020073	13770708	13034957	3220576	5411884	3923296	3507061	6729299	9353514	7403323	6926295	11705760	8089191	4931326
775	3-phosphoglycerate	Carbohydrate	Glycolysis, Gluconeogenesis, and Pyruvate Metabolism	1414	LC/MS Neg	132	583	184.986	80731-10-8	724	10669764	C00597	HMDB00807	97710064	86429840	86524944	81148384	73771384	92452344	84898880	64608764	88162448	88027640	110996560	81207608	75276864	72004840	96383328	72182712	70860584	75116016	92131528	68418336	110877432	80126400	89276248	105621624	83447480	109616744	107803752	106301120	98998504	104578448	101300640	92881296	87024904	86283080	116448760	79568048
2364	3-ureidopropionate	Nucleotide	Pyrimidine Metabolism, Uracil containing	3155	LC/MS Pos	1053	1090.6	133.061	462-88-4	111	109	C02642	HMDB00026	12865475	12087479	14398373	15247353	12391924	9551249	9934285	10045664	8102861	9973029	13788413	14233074	14692456	16262658	17496680	6875336	11195123	14155276	6643272	9201154	13796718	12021197	13543583	10895641	11513955	7819681	7208393	10161356	11718817	8818727	8425618	9637175	9575480	12759376	13594080	7048168
164	3-[3-(sulfooxy)phenyl]propanoic acid	Amino Acid	Phenylalanine and Tyrosine Metabolism	45415	LC/MS Neg	100005391	1294	245.013	86321-32-6	187488	162993			4642285	3093108	7394258	4553304	13583111	6969839	3527973	1897242	1627134	2104664	7364251	19519420	12005890	12436658	10056816	761778	3490516	4381490	4682530	2299795	5774554	5281627	5606175	10239326	12838191	4514930	5851101	2744170	3795340	1415729	5596701	9804432	5634738	3426612	6086069	1445079
1796	3beta,7alpha-dihydroxy-5-cholestenoate	Lipid	Secondary Bile Acid Metabolism	36803	LC/MS Neg	100001611	5275	431.317	115538-84-6				HMDB12454	5886512	9243360	15904225	3588336	7780909	24312476	6774545	10246292	17239704	9834660	18469140	3834478	13055638	4929502	3831384	5239165	16441677	2976512	9068648	8026940	4410523	4888371	6390033	7638518	5802911	7255685	9700780	20269650	7149766	54309036	13634703	4324446	7422152	19092344	5814844	11602077
1608	3beta-Hydroxy-7-oxo-5-cholestenoic acid	Lipid	Sterol	36834	LC/MS Neg	100001610	5236	429.301							126410	192856	19564	83979	222325	74578	183405	338479	210990	315841		114453		34796	135440	200647	7469	94449	78373	30121	70054	98622	52049	63799	43259	54713	226315	204728	807855	73569	60130	101192	379113	107514	128484
363	4-acetamidobutanoate	Amino Acid	Polyamine Metabolism	1558	LC/MS Pos	1113	1721.3	146.081	3025-96-5	18189	17180	C02946	HMDB03681	7379061	7736056	7509914	9856291	7622775	7106148	5651216	5548802	6112852	5472899	7639474	8718423	7884666	8188335	7895403	3526633	5457509	6283780	5122731	5816233	5903202	7206917	7295874	7174231	7310399	5509368	5056524	5233157	7759724	5112343	5669738	7750460	6566600	6896564	8231920	3562637
2991	4-acetylphenol sulfate	Xenobiotics	Drug	44620	LC/MS Neg	100000711	2375	215.002		4684006	3872009			513590	313993	444059	343098	303710	250537	213875	193644	318622	281064	492179	257531	296714	201202	173614	123667	357479	217037	359760	230166	237638	278759	240160	326016	223442	285765	330813	241788	319896	1734024	169951	394454	160748	193545	857684	136825
2895	4-allylphenol sulfate	Xenobiotics	Food Component/Plant	37181	LC/MS Neg	100001868	3805	213.023						975389	477315	527322	501666	382825	300443	139094	157170	339680	202213	541303	313449	520868	189911	241457	168779	255780	252073	280723	200655	150562	344239	231316	414238	929026	202470	198838	282274	204489	162865	281103	656279	398363	565485	313648	195143
2545	4-ethylphenylsulfate	Xenobiotics	Benzoate Metabolism	36099	LC/MS Neg	100001756	3580	201.023	123-07-9			C13637		96543128	63053620	70281656	59094768	51827136	61580100	41527616	43358820	54222196	61422368	106620920	42454968	55838920	38060912	42664808	46318516	64881172	37439336	91527680	51456104	55119580	33957272	32864904	63906620	52492192	47134248	49410408	53596584	52188588	46290052	48641708	71272160	37581244	46600236	97296320	51160152
368	4-guanidinobutanoate	Amino Acid	Guanidino and Acetamido Metabolism	15681	LC/MS Pos	100000096	1150	146.092	463-003;463-00-3	500	486	C01035	HMDB03464	99029272	90920584	113120400	118619752	113740272	76378936	48061552	56319792	38092408	64585220	134834448	101785032	113219648	100225560	113431664	52572656	57583736	53383324	55447040	55502932	71143192	69436248	92058608	117866936	112032216	45041636	38721688	48906152	46196432	30926376	72636440	86210120	61199608	74433416	76796296	27893436
1087	4-hydroxy-2-oxoglutaric acid	Lipid	Fatty Acid, Dicarboxylate	40062	GC/MS	100002537	1658	333.1	1187-99-1	599	579	C01127	HMDB02070	132931	66649	125268	104427	90047	55600	48706	41326	34642	48529	198266	106300	111875	109388	82769	47207	52556	83690		60924	56252	64094	111895	58115	67304	66649	67531	43543	28217	62847	53513	73704	65100	39024	19130	30066
382	4-hydroxy-nonenal-glutathione	Amino Acid	Glutathione Metabolism	48504	LC/MS Neg	100006240	3387.5	462.192	99927-70-5					1241029	540636	614498	1282116	1454802	368445	351258	459584	273772	346531	472458	702577	694113	1002558	780088	297926	340745	331602	313632	274475	514051	478444	890282	520079	1855077	358335	312349	374963	367806	334935	474216	732917	616954	666676	482917	484605
1209	4-hydroxybutyrate (GHB)	Lipid	Fatty Acid, Monohydroxy	34585	LC/MS Pos	100001507	1480	87.0441	502-85-2	10413	9984	C00989	HMDB00710	2950625	3129077	3356889	3342192	2497836	2220044	2290613	2031618	1919094	2031885	4100548	4036863	2804048	3168188	4426571	1764455	3042888	2614912	2484128	1922375	4737847	5322906	4577997	4829247	4419902	1919094	1408899	2822959	2475084	1701406	2788789	3712989	2699863	3029688	3250892	1456814
188	4-hydroxycinnamate sulfate	Amino Acid	Phenylalanine and Tyrosine Metabolism	48410	LC/MS Neg	100006095	1000	242.997	376374-66-2	6070438	4797737			2393688	1848692	2391431	2193926	2072674	2112065	897563	786064	1244606	1838467	2973345	2535422	2960994	2615836	2512357	387875	1278249	2006089	803822	972373	1641880	3030533	2683706	3030561	1977356	1254927	911788	818321	2560518	782791	1438983	2118588	1519188	1775406	1646965	618558
2507	4-hydroxyhippurate	Xenobiotics	Benzoate Metabolism	35527	LC/MS Neg	100001423	1475	194.046	2482-25-9	151012	133104		HMDB13678	483398	619402	729212	636223	475113	509281	287375	247209	308669	478330	402767	709051	471229	395206	301268	86517	334025	620140	453048	282211	300636	526914	418973	494773	439017	287832	253290	291598	675916	243319	350710	491338	318735	334801	606775	141006
170	4-hydroxyphenylacetyl glycine	Amino Acid	Phenylalanine and Tyrosine Metabolism	43525	LC/MS Pos	100004418	2133	210.076	28116-23-6	440732	389604	C05596	HMDB00735	258752	379554	290892	309351	270965	424223	313773	233071	222192	428198	236214	596531	261336	218057	244197		181447	237401	134536	364006	115455	141845	259131	330444	330313	666193	264251	281467	480961	205159	224788	395525	270205	44354	216299	270971
118	4-hydroxyphenylpyruvate	Amino Acid	Phenylalanine and Tyrosine Metabolism	1669	LC/MS Neg	1141	1690.1	179.035	156-39-8	979	954	C01179	HMDB00707	566045	712940	995396	717988	973150	473034	539792	671444	422343	417733	718679	944388	975493	748859	730415	331012	506308	450850	433755	420384	874030	817984	1109105	603665	735834	634771	420535	436299	605085	491599	556400	481748	530306	683259	533967	443382
69	4-imidazoleacetate	Amino Acid	Histidine Metabolism	32349	LC/MS Pos	100001207	757	127.05	645-65-8	96215	86856	C02835	HMDB02024	1258195	1248904	1769187	1789340	1202771	1093483	1017729	1183804	976759	890809	1410466	1921414	1318060	2822534	2651250	1172590	1355466	973071	851782	1008937	1918312	1889434	1637691	1646169	1765189	1174251	671760	677165	837248	1146216	1461617	1166660	1817199	1141372	1693250	1143212
236	4-methyl-2-oxopentanoate	Amino Acid	Leucine, Isoleucine and Valine Metabolism	22116	LC/MS Neg	100000551	2170	129.056	816-66-0	70	69	C00233	HMDB00695	28192234	27504982	35186788	28066174	27128266	11771329	11563301	13008487	13075475	6953436	32719600	30955796	29504288	27314910	20031794	12628179	11941266	11012943	16466557	12632252	24894468	23929878	30451602	29442714	25213560	12794364	17994244	16869278	13193295	21442466	17463340	24472322	21684552	33772288	13032889	15223968
2535	4-methylcatechol sulfate	Xenobiotics	Benzoate Metabolism	46146	LC/MS Neg	100004111	2665	203.002						1167801	723935	823951	862761	691320	937834	775837	1222915	1456779	1114424	1536343	436539	672690	393345	400482	300093	902220	855994	787024	991878	892122	593366	687399	600655	587738	863109	1043343	743572	1308323	899970	741533	1306699	663053	719652	1719352	693933
2546	4-vinylphenol sulfate	Xenobiotics	Benzoate Metabolism	36098	LC/MS Neg	100001755	3320	199.007	2628-17-3	6426766	4932200	C05627	HMDB04072	1910808	1545814	1719121	2034570	1666260	883657	655236	741485	910617	781621	2490753	1025190	1123000	797651	778271	523998	906650	571940	1380146	884353	740832	749339	695002	2038395	1532389	743409	755392	992656	804901	662588	728239	1972970	791361	639746	1971410	568299
91	5-aminovalerate	Amino Acid	Lysine Metabolism	18319	LC/MS Pos	100000454	835	118.086	660-88-8	138	135	C00431	HMDB03355	10836524	13040718	1582277	25343212	3873923	8700025	16263886	448757	8801290	2414866	7451131	11097069	17752856	7254917	18170338	4001777	4041036	21244620	7219909	8659456	4873780	905358	14799034	7008247	13303030	8690068	22945798	1217802	7160424	16120274	6673460	18344296	12923553			4265611
975	5-dodecenoate (12:1n7)	Lipid	Medium Chain Fatty Acid	33968	LC/MS Neg	100001232	5224	197.155	2430-94-6	5312378	4471803		HMDB00529	5512832	2269011	2100834	3235819	2461435	1574753	3217851	2913592	3280423	2280297	5783247	3348223	4746235	3894225	4452028	4628284	1740710	1758601	2492942	2282195	4649051	3698892	3423197	2489881	3823410	2495369	2399470	3387780	2178683	2865216	4259014	4622635	5292740	6024498	5132985	3871033
214	5-hydroxyindoleacetate	Amino Acid	Tryptophan Metabolism	437	LC/MS Pos	71	2559.9	192.066	54-16-0	1826	1760	C05635	HMDB00763	603309	716397	642639	654410	635449	616790	494883	465007	562219	568646	643507	700817	698515	670486	540364	422218	589226	541034	638024	467620	585094	548746	597824	598694	639667	487706	609792	554394	652487	583193	468451	648192	509790	568125	623925	448783
2702	5-ketogluconate	Xenobiotics	Food Component/Plant	15687	GC/MS	100000099	1841.1	333.1	91446-96-7	5460352	4573911	C01062	HMDB11731	93760	57828	109815	104844	103442	102531	87054	98454	78873	91713	101417	85996	123788	86270	101022	57246	82470	94239	51876	120790	115467	81007	168796	135704	66802	75967	89993	60945	111318	76542	98726	80594	94611	74820	102594	91534
2384	5-methyl-2'-deoxycytidine	Nucleotide	Pyrimidine Metabolism, Cytidine containing	38159	LC/MS Pos	100002300	1481	242.114	838-07-3	440055	389065	C03592	HMDB02224	45759388	49950948	51985620	49248196	49920052	60838840	52389896	51906540	60910664	59401396	51964964	43571868	41019032	34241520	35971456	52487424	52340056	53539260	51969860	50128996	37218344	43579492	41923980	47603372	46533664	47390672	54812188	56005760	60458648	52602540	35058848	49729984	40684724	39510408	33544840	43595940
2376	5-methylcytidine	Nucleotide	Pyrimidine Metabolism, Cytidine containing	22119	LC/MS Pos	100000763	1420.5	258.108	2140-61-6	92918	83877		HMDB00982	33832776	32752384	32507968	34383260	34626100	29984310	28007482	27471448	31455546	29018164	38048596	36374488	35901784	35757104	34944220	28060432	27504478	28662252	26681598	28290394	37258508	34156308	38837900	33433012	33698312	27674890	29219314	30472110	29799808	31285746	32817846	36073196	33936088	38138596	36709784	25868994
359	5-methylthioadenosine (MTA)	Amino Acid	Polyamine Metabolism	1419	LC/MS Pos	212	2444.9	298.097	2457-80-9	439176	388321	C00170	HMDB01173	9702893	12045313	11570818	11332318	10664909	11277356	10118338	8656081	10659403	10665301	9688276	10039196	8693932	8575890	8453793	8496570	7795666	9611769	6882559	7007932	8577621	7611626	9308142	9700396	9150799	3842508	4045878	4525518	5940945	4136378	9650494	10010548	8855392	8421963	11851726	3353750
2351	5-methyluridine (ribothymidine)	Nucleotide	Pyrimidine Metabolism, Uracil containing	35136	LC/MS Neg	100001446	1778.1	257.078	1463-10-1	445408	393058		HMDB00884	499566	404388	356419	425864	252291	250798	238386	229404	295486	230993	460924	451617	448348	389463	455985	232402	211031	191327	223707	174883	345731	292508	266514	418105	296506	295726	299323	312420	244221	247378	367695	349333	339277	345570	322716	233756
378	5-oxoproline	Amino Acid	Glutathione Metabolism	1494	LC/MS Neg	1021	738.5	128.035	98-79-3	7405	7127	C01879	HMDB00267	100234000	94349984	98849528	95895848	84761904	115910384	96148896	123142248	85543240	112591736	161057520	109388512	112778584	102055696	103978544	69966440	93207472	92606336	75836960	102289432	169356864	110766968	156962304	123297048	104911128	139833808	121506752	134453632	142075408	115238680	160306752	134451744	116436936	116215800	176506496	104400720
1649	5-pregnen-3b, 17-diol-20-one 3-sulfate	Lipid	Steroid	37482	LC/MS Neg	100002128	4800	411.185	28901-70-4	152971	134824		HMDB00416	93078	51131	64314	101148	40132	61810	69900	101379	63120	51494	140241		197772			37847	60227	21333	20246	105737	199550	105842	209308	154253	56206		106505	67553	35621	71095	129074	48586	53145	103002	247716
1781	6-oxolithocholate	Lipid	Secondary Bile Acid Metabolism	46336	LC/MS Neg	100001068	5033	389.27	2393-61-5	164960	144621			72723	305110	280427	407390	271878	305935	362395	384964	2718931	413860	474641	155157	220069	108896	387918	87338	1259547	4034458	422986	429382	194740	546020	721511	398996	445545	359824	325718	181288	3445547	4382467	165789	863380	680416	388592	1017892	1274103
2998	6-oxopiperidine-2-carboxylic acid	Xenobiotics	Drug	43231	LC/MS Pos	100004499	1826.6	144.066	34622-39-4	3014237	2282737		HMDB61705	3110517	2628867	2427764	3477714	2680628	2507150	1225696	913191	1718019	2723836	2916629	3733562	2076467	2706069	4322802	950854	1413594	2170017	1932781	1663663	1510542	2858356	1891979	2748873	3690114	1759299	1379700	1245349	2161213	736925	1600764	2264177	1805102	1911837	995027	1118531
1599	7-alpha-hydroxy-3-oxo-4-cholestenoate (7-Hoca)	Lipid	Sterol	36776	LC/MS Neg	100001609	5288.1	429.301	115538-85-7	3081085	2338765	C17337	HMDB12458	4804425	4975331	6330247	2327388	3414269	6769758	3055986	3927979	6810121	4418900	13194550	3973742	7263707	3754471	6271065	2516203	5064977	1902878	4149003	2914792	3198207	4440281	4186109	4789548	5090711	2755383	2565759	5541031	3242875	18701834	6367060	3041469	4673393	9702635	3892274	7263707
1630	7-hydroxycholesterol (alpha or beta)	Lipid	Sterol	47890	LC/MS Pos	100005999	6164	367.336					HMDB01496	412140	911243	1367385	1856583	4976400	1146074	933718	401854	586492	185565	636322	1405187	431287	1806298	535209	109720	805263	1056947	2596413	1695093	1051842	649936	1287827	245324	6533831	789455	443872	942767	190346	2260095	1019247	305760	371568	226118	178401	7529631
2319	7-methylguanine	Nucleotide	Purine Metabolism, Guanine containing	35114	LC/MS Neg	100001456	1729.7	164.058	578-76-7	11361	10883	C02242	HMDB00897	858548	899687	851883	1000329	939797	778833	819464	791528	815990	723049	1124006	930868	973507	833725	889307	784455	784433	721243	847684	743453	1000959	894135	875431	922556	941326	774035	698582	825740	799403	803684	911119	1011959	932890	913838	1103411	633692
1249	9,10-DiHOME	Lipid	Fatty Acid, Dihydroxy	38399	LC/MS Neg	179	5180	313.238	263399-34-4	9966640	8142232	C14828	HMDB04704	1176009	1220285	1499612	1804920	1000675	1401048	1312505	896240	2464915	2785822	2237164	1465914	1663391	1707275	2788835	983177	524447	1080984	1175844	1527125	1543951	2278196	1159692	1585009	1549593	1407792	1426795	2014684	1408861	935696	1497126	1651343	2233296	3703391	2084658	824197
730	Ac-Ser-Asp-Lys-Pro-OH	Peptide	Polypeptide	40707	LC/MS Pos	100003761	1760	488.235	127103-11-1	4409396	3610210			102742	116539	143227	113238	112156	134229	150479	101671	106857	131792	149895	191081	90894	110146	11504	115874	128914	138489	178595	100108	190933	168474	164892	165145	152693	136414	113745	153202	115959	108485	109013	146875	139526	183719	166753	133044
1205	acetoacetate	Lipid	Ketone Bodies	33963	GC/MS	1218	1285	231.1	3483-11-02	96	94	C00164	HMDB00060	161957	129079	167462	168858	185202	129898	303988	197539	123153	114870	176527	111651	220594	135069	192260	280072	131261	113321	143222	163641	111831	156696	214462	127771	110045	163045	193262	147406	80643	145265	133603	324492	110654	142007	159184	183641
1183	acetylcarnitine	Lipid	Fatty Acid Metabolism(Acyl Carnitine)	32198	LC/MS Pos	100000802	1166.9	204.123	5080-50-2	1	5406074	C02571	HMDB00201	994438656	977293568	1114599424	1199845248	1117368832	1057065344	1073253888	921686912	936846016	1073187328	1065055744	1024514624	954397824	943034816	1006253632	1034533824	1025890240	1051041984	1117368832	951539840	1135899776	873903104	1118808576	1097265536	1101005312	971951424	1075834496	958750400	969132480	925562304	1065025344	1075550720	1092671360	1022220352	1088552064	936982592
355	acisoga	Amino Acid	Polyamine Metabolism	43258	LC/MS Pos	100004541	2290	185.128	106692-36-8	129397	114601			1136733	1212430	1281541	1143104	1625063	1648121	1998532	1310692	1895299	1250070	1346766	837400	1136055	980588	730897	1778973	1279874	1585430	1544537	1422627	1571543	1013273	1023728	982377	1067582	1318119	1140189	1178002	1492862	1757103	1057432	1534980	1519280	1260173	2066829	1054568
945	aconitate [cis or trans]	Energy	TCA Cycle	46173	LC/MS Polar	100001359	4260	173.009				C00417,C02341	HMDB00072,HMDB00958	224783200	255295600	293038560	248607744	247822960	181068768	173837440	191461776	164882112	164907648	235179088	243633200	249771248	180553888	129974072	173468576	141243216	191333872	129007128	187231024	225316144	269201024	199972992	231385424	210072912	147807968	149726160	175734576	175282832	147492208	264716448	204791744	217561536	212735984	226409616	163349648
2284	adenine	Nucleotide	Purine Metabolism, Adenine containing	554	LC/MS Pos	880	1002	136.062	73-24-5	190	185	C00147	HMDB00034	6541278	6926451	7106101	6894920	6827016	8669659	9047401	9862709	4725400	8708502	8395458	6508205	6258174	4690259	5726770	7701795	8728997	10180108	9297676	6737055	7424251	5864114	7755364	7524654	5557818	6097958	5390208	5600234	10964660	5298638	8542087	7810616	7524122	5886470	8601291	4746072
2283	adenosine	Nucleotide	Purine Metabolism, Adenine containing	555	LC/MS Pos	798	1625.3	268.104	58-61-7	60961	54923	C00212	HMDB00050	1288172	1837530	1163111	1399101	1641385	2090369	1761624	2372868	1112291	2783958	1291680	1250213	1164316	992527	1194264	2763026	1978753	1863462	2149840	1872221	1816868	1392280	1843429	1812501	1031314	1241157	1081105	1076354	2678832	2013422	1331307	1343412	1161486	986310	1647538	1381938
2279	adenosine 3',5'-cyclic monophosphate (cAMP)	Nucleotide	Purine Metabolism, Adenine containing	2831	LC/MS Neg	207	1952.2	328.045	60-92-4	6076	268	C00575	HMDB00058	478121	414337	443204	451258	483899	395858	439948	518949	385523	376709	582873	503755	599967	470341	436446	339530	382907	342601	418693	254270	556836	430654	531942	490884	539064	293804	285499	332812	385904	344247	484671	484354	492357	494131	571527	312678
2275	adenosine 5'-diphosphate (ADP)	Nucleotide	Purine Metabolism, Adenine containing	3108	LC/MS Neg	208	680	426.022	20398-34-9	6022	5800	C00008	HMDB01341	52206296	61777100	59332656	65089492	56292028	53192716	46609324	28501690	54917700	41620280	52769760	59906420	57587240	54974640	53267452	34423704	35935764	51607408	53499848	41373624	37826796	31705282	49097140	31804558	40544756	30104082	34033540	31586782	18722790	31670618	43997300	45124052	41058436	49655788	47598212	26224626
2419	adenosine 5'-diphosphoribose (ADP-ribose)	Cofactors and Vitamins	Nicotinate and Nicotinamide Metabolism	558	LC/MS Neg	215	920	558.064	68414-18-6	192	3674071	C00301	HMDB01178	59467788	58536516	55942908	57659316	53208036	50320004	49980360	51092788	55557568	50960900	60364980	63003220	62994340	53667248	60561888	44459468	49441140	43052292	57212840	45049456	45433604	44505064	55200652	49321864	54549976	46837768	45399872	48699000	40985116	38671872	54993696	56894404	50493648	54011300	51242928	40634200
2276	adenosine 5'-monophosphate (AMP)	Nucleotide	Purine Metabolism, Adenine containing	32342	LC/MS Pos	209	1208	348.07	149022-20-8	6083	10239183	C00020	HMDB00045	133966384	201359664	215773728	156121152	160962352	206026064	230179024	170741952	186362512	168509984	159515088	113416136	96250456	63635016	66019716	144096656	131809432	269625280	198663584	170174304	119568680	104171064	52079704	135143440	81920736	171951536	155835952	181123200	206319728	166206256	123563728	96544288	85437320	61483776	170556224	106590584
818	adenosine-5'-diphosphoglucose	Carbohydrate	Pentose Metabolism	35652	LC/MS Neg	100001644	901.9	588.075	15839-70-0;102129-65-7	16500	193	C00498	HMDB06557	280294	273093	319001	321785	296377	202691	232905	249870	241151	236377	288521	432411	307989	467274	560486	171436	216608	236377	244768	250497	530165	607816	896492	563495	667575	887265	784645	959676	827667	778237	413713	519182	484258	580283	515037	534272
1088	adipate	Lipid	Fatty Acid, Dicarboxylate	21134	LC/MS Polar	100000863	3000	145.051	124-04-9	196	191	C06104	HMDB00448	10166305	8730960	12579472	8360180	10299985	5099851	6981601	6697065	5477716	5090725	13128392	8953262	11544122	3945963	5139570	3580936	3584643	7274037	3095800	5416939	6880647	7484471	10188119	6164209	7446652	6416154	4984760	5139570	4267375	3944888	8143498	5587390	8464665	4049801	8954377	3556142
1025	adrenate (22:4n6)	Lipid	Polyunsaturated Fatty Acid (n3 and n6)	32980	LC/MS Neg	100001193	5678	331.264	2091-25-0	5497181	4445971	C16527	HMDB02226	74965184	94290184	52473556	80850056	79772336	122133048	66054904	81495784	169771824	52463584	116962264	101456280	113932608	23281320	76483392	73654200	101286320	92862264	135225872	96368544	145196112	111120328	175837408	86284416	87078264	122941176	152118784	118897536	85439328	113238432	102277944	212349152	121147184	120263400	151813200	98898864
24	alanine	Amino Acid	Alanine and Aspartate Metabolism	1126	LC/MS Pos	811	696	90.055	56-41-7	5950	5735	C00041	HMDB00161	86800800	87090600	86766632	86259720	74559800	66205808	51410228	49390604	54798736	60399464	79005168	105480032	92896936	99061808	96319744	34011512	61893228	70930520	63473592	53220392	79351672	87355472	83514248	85473464	85801608	57430116	55515424	53538248	62879856	63595340	72963728	69719320	69613472	77726680	65361672	47529916
416	alanylleucine	Peptide	Dipeptide	37093	LC/MS Pos	100001890	2165	203.139	1638-60-4	259583	227831		HMDB28691	45296	132765	90567	117526	94383	128242	86755		194201	74045	62758	171654	109224	83712	156443		107801	95968	132992	109883	83603	99620	74340	77232	124741	119062	79993	62842	108972		31670	121170	58109		171209	40431
2272	allantoic acid	Nucleotide	Purine Metabolism, (Hypo)Xanthine/Inosine containing	33434	LC/MS Polar	218	2960	175.047	99-16-1	203	198	C00499	HMDB01209		468234	573846	425746	493528	453228	374749	214065	369449	223433	234697	339934	319038					457928	336673	326853	160124		545009	249900	345412	542267	324404	428535	250797	442184	314612	213403	87840		597563
2271	allantoin	Nucleotide	Purine Metabolism, (Hypo)Xanthine/Inosine containing	1107	LC/MS Polar	1002	1672	157.037	97-59-6	204	199	C02350	HMDB00462	103542472	100676608	98242560	108542800	103740176	72874552	91173896	81948360	83732968	100217912	102320296	108403752	109742488	106971256	97174504	76391584	112519032	103176184	76651112	77341576	118465912	111607552	111760272	98741064	96438032	86993528	77304480	77737712	103084320	109623144	87425264	109954600	105222616	97708808	126416512	90797144
263	allo-isoleucine	Amino Acid	Leucine, Isoleucine and Valine Metabolism	46552	GC/MS	100005840	1325	158.1		6950182;99288	89698		HMDB00557	111392	156898	137891	179608	101602	101292	72703	70452		55211	252523	198038	127499	98150	204887		120400	62022	113683	68977	117980	293743	125227	119507	109192	76834	57576			94869	229458	190200	165593		185501	126800
2450	alpha-CEHC	Cofactors and Vitamins	Tocopherol Metabolism	48188	LC/MS Neg	100002206	4045	277.145	4072-32-6	9943542	8119154		HMDB01518	657575	889736	608436	623850	559604	804200	400552	348585	926834	592936	986783	424106	621313	538885	468050	454293	720964	683036	908683	607149	679547	691464	446893	789003	519041	535416	1033413	587218	817595	1407724	652071	480094	703355	966390	540837	632199
2448	alpha-CEHC glucuronide*	Cofactors and Vitamins	Tocopherol Metabolism	39346	LC/MS Neg	100003101	2616	453.177	477200-36-5					288194	223858	245287	334676	203624	108832	75984	129993	138836	85517	432476	246626	358864	279054	308675	128840	168297	134255	166963	127922	330009	311861	313432	384630	168647	136884	178030	169710	117376	168472	421210	283295	346875	438913	406982	250602
2449	alpha-CEHC sulfate	Cofactors and Vitamins	Tocopherol Metabolism	47666	LC/MS Neg	100005972	3090	357.101						192520	203023	379728	310010	235655	206965	184959	289947	191665	254657	311703	525073	245211	595357	451485	100187	249121	329353	211254	226796	314138	227807	392396	352535	312822	221833	227747	204060	350153	265072	318088	275386	352107	384358	494978	213978
281	alpha-hydroxyisocaproate	Amino Acid	Leucine, Isoleucine and Valine Metabolism	22132	LC/MS Neg	100000706	1840	131.071	10303-64-7	83697	75520	C03264	HMDB00746	3226627	3055988	4911249	3628308	3597368	2631624	1075950	2055671	2627915	333289	2853381	2306389	3374536	2204244	1957869	994584	1421217	2765621	4332597	1946495	1207137	2199188	1748216	1471010	2721714	530751	738748	1413394	746788	732633	2274130	2768219	2228644	1102428	1385229	1673887
252	alpha-hydroxyisovalerate	Amino Acid	Leucine, Isoleucine and Valine Metabolism	33937	LC/MS Neg	100001300	1126	117.056	600-37-3	99823	90190		HMDB00407	3951043	5075600	5372212	5264929	4348672	3842510	2910850	3051391	3222682	2829176	4702203	4138432	3858519	3500001	3773744	2577733	3446893	3120297	5152377	3578062	3132394	4801616	3361873	2947908	4271168	2489162	2518962	2859213	2568605	2742237	3854386	4269288	3963091	2946971	3248124	3451788
246	alpha-hydroxyisovaleroyl carnitine*	Amino Acid	Leucine, Isoleucine and Valine Metabolism	46263	LC/MS Pos	100005836	1863	262.165						447108	342090	389915	456102	482172	481528	541788	393435	221426	508311	459653	348860	351139	328882	370833	255181	570583	604278	413022	430831	386222	310899	371816	415644	360182	361543	319027	281820	492398	285053	286217	275014	256559	360456	333500	275591
297	alpha-ketobutyrate	Amino Acid	Methionine, Cysteine, SAM and Taurine Metabolism	42107	GC/MS	796	1220	231.1	600-18-0	58	2829426	C00109	HMDB00005	13552		12769		13415	4638	17773		9266	11208		7791	22086	7075	17894	6103	10811		8009		23560	11816			8234			17773		8156	6614	16278	11123	14242	14531
948	alpha-ketoglutarate	Energy	TCA Cycle	528	LC/MS Polar	93	2700	145.014	305-72-6;328-50-7;22202-68-2	51	50	C00026	HMDB00208	205891920	178478736	281466144	200212304	220400656	117800768	98149312	111764912	65964764	99566480	266022816	178208336	128010120	145361728	134295664	71036736	84868376	120518744	55526020	130341720	113852400	129251752	236608816	100412952	145368608	144465216	149338288	137287696	73470768	113975824	106652752	147250336	117732592	167415632	27208268	120576816
1760	alpha-muricholate	Lipid	Primary Bile Acid Metabolism	34092	LC/MS Neg	100001280	4765	407.28	2393-58-0	3083761	2340918	C17647	HMDB00506	490186	10504661	3311651	14686824	3688728	262454	1457194	100556	947631	682728	6731002	908615	235650	856541	5969454	102623	8128036	6206682	1295773	275377	932941	5425274	1058314	3660339	9246975	992421	142421	41961	2431256	1701597	526408	14266803	5893574	22634196	1711896	2243212
2438	alpha-tocopherol	Cofactors and Vitamins	Tocopherol Metabolism	1561	GC/MS	1105	2305.4	502.5	59-02-9;10191-41-0	14985	14265	C02477	HMDB01893	1466396	1393807	2108019	1336365	1295713	1895899	1580611	1438700	1325312	1476548	1480722	1689845	3522597	1298510	905317	1091665	1265399	2394964	1523288	1443589	1723016	1709235	2683264	1956203	702003	1659947	1376094	1673938	1561890	2028796	1609775	936810	1891408	1025428	1467339	873152
405	anserine	Peptide	Dipeptide Derivative	15747	LC/MS Neg	100000044	1124.8	239.115	10030-52-1	112072	100482	C01262	HMDB00194	90116	145128	203183	133677	176049	201386	258052	281501	318912	202116	130880	100203	196821	110306	282246	159514	218516	237619	135855	173500	144542	98135	181873	91027	137411	119084	174860	244169	253043	255303	89168	96468	187416	159461	191838	108812
202	anthranilate	Amino Acid	Tryptophan Metabolism	4970	LC/MS Pos	1258	3220	138.055	118-92-3	227	222	C00108	HMDB01123	1492799	1595807	1342373	1497845	1389176	1732893	1824037	1857596	2181365	1823256	1399617	1375259	1118283	1218073	1395218	1197752	1969462	1947714	1858195	1816021	1305881	1453537	1192785	1276492	1238545	1571652	1540330	2078112	1923499	1735171	1065422	1925283	1204240	1771478	1810851	1400133
804	arabinose	Carbohydrate	Pentose Metabolism	575	GC/MS	828	1631.6	217	28697-53-2	66308	59687	C00216	HMDB00646	133662	163001	154104	270598	142670	150491	160089	126639	180584	112854	149448	136389	141504	134948	188339	93570	185249	153712	256065	103660	136358	243660	219810	164003	150446	121941	65656	103690		123408	131476	145250	154540	139471	216175	62852
809	arabitol	Carbohydrate	Pentose Metabolism	38075	GC/MS	100000012	1687.5	307.1	7643-75-6	94154	84971	C01904	HMDB01851	55576	93172	66181	61840	61547	52136	38618	41697	42794	32873	54665	57850	76564	50120	58768	22660	42959	40308	32847	37723	47105	52592	98630	76620	52913	42696	27538	47105	28633	25408	50008	46258	41211	40239	35520	23530
996	arachidate (20:0)	Lipid	Long Chain Fatty Acid	1118	LC/MS Neg	893	6295	311.296	506-30-9	10467	10035	C06425	HMDB02212	39117536	25867318	20788554	36713364	28671156	27218198	22636148	21991180	48177776	29518842	27787524	35429624	33132976	35384216	48638116	21211826	25047220	22924076	27769144	24116746	31705580	38948020	32117688	33826308	37301612	37048116	25687254	33366716	23212002	26756092	22924076	35944864	26777346	37438892	26152338	37537336
1024	arachidonate (20:4n6)	Lipid	Polyunsaturated Fatty Acid (n3 and n6)	1110	LC/MS Neg	229	5535	303.233	506-32-1	444899	392692	C00219	HMDB01043	1065363904	1816299392	1197285120	1380455296	1661994240	2416882944	2008497920	2049740800	2741289472	1855726720	2116137472	1906722560	1615434496	581034688	1869293184	1887026176	1994951168	2137111680	1743038208	2817213696	2797917952	2119675392	2070927744	2096031104	1765629696	3118383360	4300706304	3046701824	2751640064	3534917632	2128884480	2607216128	1989968896	2031793024	2735618816	2364199168
318	arginine	Amino Acid	Urea cycle; Arginine and Proline Metabolism	1638	LC/MS Neg	231	736	173.104	1119-34-2	232	227	C00062	HMDB00517	71970312	76003040	72963136	72449912	75468344	77394752	62894340	66168544	79458024	69795672	70172824	75008256	66705428	64152556	61062600	58945228	66422056	64886736	74560088	63498664	70891488	67129416	71190624	71939536	78292088	69879352	71151648	75246768	58264556	74067360	66212392	72343376	66953808	68008256	63048680	59116992
323	argininosuccinate	Amino Acid	Urea cycle; Arginine and Proline Metabolism	15497	LC/MS Pos	232	709.8	291.13	156637-58-0	16950;828	805	C03406	HMDB00052	831951	608053	862194	718196	1202097	369000	441236		151834		917938	367066	309067	876497	526429		197641	357511	351968	196266	619045	968946	1340242	916501	744506	165957	483675	94429	293476	291946	498686	571818	710466	451851	265219	146229
2432	ascorbate (Vitamin C)	Cofactors and Vitamins	Ascorbate and Aldarate Metabolism	1640	GC/MS	233	1850.1	332.1	134-03-2		10189562	C00072	HMDB00044	407227	444326	311115	342784		414755	468936	237232		325012	596712	616672	323932	460767	429435	360914	378672		280318	411706	613556	538461	592518	399346	287863	465429	352372		397004	158475	756113	375412	343930	294204	415055	216955
29	asparagine	Amino Acid	Alanine and Aspartate Metabolism	512	LC/MS Pos	917	679	133.061	70-47-3	6267	6031	C00152	HMDB00168	5127419	5435352	5155505	5118800	4439252	4613996	3861258	3703077	4593843	4694893	4316519	5136563	3729348	4297502	4165216	3610108	4508844	4382156	3670222	4384153	5241378	4883163	4692746	5527966	4167772	4042164	4178518	4258809	4940143	5311082	4649831	3552525	4137478	4132566	3775695	3753013
27	aspartate	Amino Acid	Alanine and Aspartate Metabolism	443	LC/MS Polar	234	3500	132.03	56-84-8	5960	5745	C00049	HMDB00191	73321440	57406888	65084156	49123484	61127372	92376728	74314040	161212128	58604872	122403408	120426224	63274056	152193776	113806752	65271196	75222520	138548944	75838600	52133872	78914464	125429600	140256544	83972256	101668736	74263624	97784808	80259464	88522392	172107824	83564736	66606488	123334232	137609536	106378752	196256112	124827176
1098	azelate (nonanedioate)	Lipid	Fatty Acid, Dicarboxylate	18362	LC/MS Polar	2029	2520	187.098	123-99-9	2266	2179	C08261	HMDB00784	5031920	5915254	5917100	7471131	6271665	4257973	4694124	3653811	4761482	5477490	6267364	6117795	6942799	5226545	5232743	1972324	3907221	6187462	3192059	4490639	4690595	6176828	6885289	5392128	7503635	3980610	4949700	4199332	5601013	4086781	4990776	7677597	5585689	8116678	4953917	3383923
2513	benzoate	Xenobiotics	Benzoate Metabolism	15778	LC/MS Neg	100000008	1750	121.029	65-85-0	243	238	C00180	HMDB01870	4095301	3712631	2647363	3016510	2911750	3615156	3690377	3284286	4589398	2788203	4797492	3452728	3873042	2853475	3423764	2786980	3125247	2490743	3368862	3241649	12089910	2774021	2725884	3075385	3531951	1897893	3462278	3242942	4064347	2853807	3252826	4454189	3013174	3741028	4460213	3115366
2365	beta-alanine	Nucleotide	Pyrimidine Metabolism, Uracil containing	55	GC/MS	244	1451.8	174	56-41-7;107-95-9	239	234	C00099	HMDB00056	186065	101535	140636	242706	194529	135634	203145	214299	297866	171981	195175	106338	211190	69304	294459	151618	141744	107089	189424	129961	256665	185940	191633	170749	246883	118299	216750	292488	128273	129052	158249	136937	164310	183471	340595	128418
244	beta-hydroxyisovalerate	Amino Acid	Leucine, Isoleucine and Valine Metabolism	12129	LC/MS Neg	1442	1027	117.056	625-08-1	69362	62571		HMDB00754	4787435	3487472	4975418	3633636	4714606	4599821	4370142	3745658	4831533	4824491	5901879	4218489	4755651	5414340	3912008	2445331	5180275	3583410	4019987	4194056	4538941	3680141	4019724	3872987	4591424	3307389	2951363	3529588	4518834	4179034	3515497	3533183	3707155	3741619	4512523	1809699
245	beta-hydroxyisovaleroylcarnitine	Amino Acid	Leucine, Isoleucine and Valine Metabolism	35433	LC/MS Pos	100001594	1701	262.165	99159-87-2		21403176			9763818	8869661	11114893	11477925	9781235	9451814	9419496	8673501	7599981	9938045	10574256	8385477	8975879	8960602	11324587	8274980	8956481	9826753	9592550	7493724	9252839	8326287	9836608	12830570	10030645	8117609	7655717	7723714	9729550	7625177	8528161	10716055	9490751	10314247	9898424	7712772
1759	beta-muricholate	Lipid	Primary Bile Acid Metabolism	31885	LC/MS Neg	100001066	4794	407.28	2393-59-1	5283853	2340919	C17726	HMDB00415	2235114	12160295	7271287	15293463	7346575	1100599	5026443	1080747	14046916	4424800	17212384	3304657	1637405	5104875	10015155	311610	13330477	14058710	2903709	1864511	5153360	11899353	3484836	6566526	11981687	5616737	2035480	528955	24530586	14592924	1786973	24009502	14190607	34837760	4906340	8271397
1610	beta-sitosterol	Lipid	Sterol	27414	GC/MS	100001033	2380.8	357.4	83-46-5	222284	192962	C01753	HMDB00852	371670	435593	407480	265515	276683	793524	510593	575872	615681	288470	437150	252936	430247	298548	239283	296230	688247	493461	701900	664548	321213	338475	538782	286985	221195	519875	536109	678462	640066	927465	210430	372874	505717	439670	404490	351376
2440	beta-tocopherol	Cofactors and Vitamins	Tocopherol Metabolism	42316	GC/MS	100001641	2260	222.1	148-03-8	6857447	5256784	C14152	HMDB06335		129135			150734	150100	187359	147685	157791	231710		123405		132997	161696	99602	173297		331060			207988	149232				294585			157603		133206	224383		285993	98538
6	betaine	Amino Acid	Glycine, Serine and Threonine Metabolism	3141	LC/MS Pos	799	734	118.086	107-43-7	247	24219951173	C00719	HMDB00043	1925259520	1771851520	1868405504	1946040448	1811113088	1475655040	1273522560	1358084864	1127490816	1305170816	1976424832	2157203456	2093154048	2133703168	2014717696	1139166336	1459171968	1377975040	1388621568	1298058880	1754990080	1905928832	2049837568	1923482240	1960260480	1373815552	1299262464	1390021888	1316628480	1224859392	1684784384	1795769600	1619269376	1785035392	1817599104	1324015616
2476	biliverdin	Cofactors and Vitamins	Hemoglobin and Porphyrin Metabolism	2137	LC/MS Neg	250	4695.6	581.241	55482-27-4;55482-27-4	5353439	10628548	C00500	HMDB01008	10957					11373			23252		28587	34701	58057	55863	13740		9715	9538		9534	38108	22230	46967	27082	50668					14044	17558	12813	31523	24009	20790
2458	biopterin	Cofactors and Vitamins	Tetrahydrobiopterin Metabolism	12358	LC/MS Pos	1548	1562.7	238.093	22150-76-1	445040	392795	C06313	HMDB00468	4306107	4563062	4519334	5583494	3901797	2283809	3011828	2654527	2817668	2658873	3915402	5506193	4798885	3828238	2734992	2465093	2459805	2260926	2683475	2793330	5800791	6060719	4732927	6446142	5365432	2503856	2330454	2491230	2853057	2564251	5099295	5530484	4386329	5320998	5622238	2631006
2453	biotin	Cofactors and Vitamins	Biotin Metabolism	568	LC/MS Pos	251	3028.2	245.095	58-85-5	171548	149962	C00120	HMDB00030	954987	1386890	1480488	897603	1047622	1616038	1582598	1193779	1311698	1408637	1753640	742163	1039431	702795	889141	743365	1204150	1602033	1086868	911189	1260230	1076587	1012750	918723	1042261	1047566	930063	1071292	1097149	1338226	779642	1379619	931399	1156027	1113040	862231
1166	butyrylcarnitine	Lipid	Fatty Acid Metabolism (also BCAA Metabolism)	32412	LC/MS Pos	100001054	1977	232.154	25576-40-3	439829	184820	C02862	HMDB02013	59065184	50806076	72993040	99117008	66488988	66628956	24742276	28182322	11402046	41461724	32015742	56197740	46633884	40498652	39904056	28033590	37745916	103844208	101108200	23004608	18497026	19478610	43653800	93064040	77653544	16396052	9372397	17142108	14174036	8532197	46465812	22126284	19699718	16723749	23833406	17302166
1167	butyrylglycine	Lipid	Fatty Acid Metabolism (also BCAA Metabolism)	31850	LC/MS Pos	100001151	2071	146.081	20208-73-5	88412	79766		HMDB00808	19889010	18585302	25131640	20759084	18688968	14587534	17205234	13831888	4845018	9500680	19082334	89083760	41492444	67229728	38431876	8537438	10422307	17296802	18025572	10384340	17066884	24446954	53121484	39671976	74738336	10796142	9579932	12518245	10272238	6448111	34567444	30539546	25649228	17561232	25034078	9108818
230	C-glycosyltryptophan	Amino Acid	Tryptophan Metabolism	48782	LC/MS Pos	100006379	1907	367.15	180509-18-6	10981970	9157171			1041548	1162091	1131162	1220469	1107125	1149644	1246744	1049921	1019673	1114510	1129286	1236693	1026212	981408	943041	1096669	1036453	1114510	1164874	980377	1241139	1121076	1194421	1110286	1039944	1060710	1008106	1222996	1112455	1042984	1074409	1076491	1100686	966560	1404075	1006844
1612	campesterol	Lipid	Sterol	39511	GC/MS	100001269	2353	343.4	474-62-4	173183	151215	C01789	HMDB02869	433195	540102	709758	382362	468690	872408	702601	897362	820229	643509	396414	469381	714249	381169	587332	715437	902910	762034	880941	862023	586042	584564	942349	761943	326429	575759	637433	840258	913392	1045313	546153	478180	708213	489373	561278	465839
971	caprate (10:0)	Lipid	Medium Chain Fatty Acid	1642	LC/MS Neg	888	5090.7	171.139	112-37-8	2969	2863	C01571	HMDB00511	12380377	6964961	7748589	11587555	7782072	5527248	8121468	6906129	11103286	6083929	11798095	12016515	10089036	11384406	15032582	9458976	6080057	5094163	6977221	6387496	8415498	10902053	9852383	7195889	11945212	6830652	6920914	8003721	6087915	7292535	7079072	11231534	10440338	21070212	11732960	8901119
967	caproate (6:0)	Lipid	Medium Chain Fatty Acid	32489	LC/MS Neg	926	2713.7	115.076	142-62-1	8892	8552	C01585	HMDB00535	4804218	3018267	3369638	5150931	4334843	2529458	3408863	3041575	2856196	3378166	2933702	3401219	3430872	5129226	8360855	2722556	2920713	3376032	2532560	2590219	2804501	2555144	4613600	5028305	7191016	3711596	3066265	3162015	2895911	3090007	3336769	4586652	3648779	4628778	3519136	3265779
969	caprylate (8:0)	Lipid	Medium Chain Fatty Acid	32492	LC/MS Neg	932	4362	143.108	124-07-2	379	370	C06423	HMDB00482	3539602	2813175	2473719	3044395	2625542	3621479	3591684	3096261	3566892	2069426	4432596	3569306	3194815	3520742	6178845	3110435	2810411	3118028	2786491	2672928	3194595	2382667	3289234	4461748	4502992	3852942	3419890	3474138	3096261	3206191	4689649	4878408	3705155	3851262	3765684	1478685
1202	carnitine	Lipid	Carnitine Metabolism	15500	LC/MS Pos	100000007	688.9	162.112	461-05-2	10917	10455	C00318	HMDB00062	139429504	140227552	164638528	162398320	148099104	148576864	170423552	141089520	189760064	170869600	111263112	142166400	133747952	147912480	149099136	147974272	146789952	188747744	188341152	151731760	125801432	139669424	162198080	150781872	141646384	137127984	180706640	167247312	164978080	178307552	122695768	138263568	151720464	148908320	143794928	120034144
402	carnosine	Peptide	Dipeptide Derivative	1768	LC/MS Neg	249	804	225.099	305-84-0	439224	388363	C00386	HMDB00033	518265	410129	325439	448643	273387	343116	377043	413737	415549	501005	420875	310146	438755	474055	723534	336621	286830	238481	342308	303443	418218	205413	257674	299493	324020	300159	351130	367113	444436	305904	537013	563500	675356	657548	628073	335284
2530	catechol sulfate	Xenobiotics	Benzoate Metabolism	35320	LC/MS Neg	100001605	1906	188.986	120-80-9	3083879	2341024	C00090	HMDB59724	40014976	35642064	42331164	31919702	28558344	26560078	14040183	22988474	23689550	17961530	39134784	23695352	30987666	29162692	26687750	12294343	20342694	19683068	22521110	21250982	20749486	18607920	24451824	34506068	20164730	16451603	18175986	18014450	14422571	7589513	18053174	26872538	15838261	24132160	31094056	13882010
1756	chenodeoxycholate	Lipid	Primary Bile Acid Metabolism	1563	LC/MS Neg	1123	5264	391.285	474-24-9;474-25-9	10133		C02528	HMDB00518	8821633	17982064	14842007	21116816	12343017	4366010	8992473	2604108	46777468	21747034	34307824	5468875	2672652	7287066	45445420	1397011	16955980	21090588	15527090	3244811	10581309	26393830	12408910	17922938	16682878	15377259	5807153	1047356	23444644	54670996	4899609	33797964	24138112	39611624	20099734	64198528
1345	chiro-inositol	Lipid	Inositol Metabolism	37112	GC/MS	100001859	1857	318.1	643-12-9		10254647	C19891	HMDB34220	3753512	4427405	3782711	3606987	2456715	3128904	2023795	2043617	2704777	2854439	3731297	3577176	4090798	2808183	2940438	1017893	2510985	2176205	1388212	3085992	2215864	3692046	4205882	3502538	2638811	2543967	2637553	2422884	2033990	1997594	2490102	1901310	2489965	3302322	2241207	1000011
1753	cholate	Lipid	Primary Bile Acid Metabolism	22842	LC/MS Neg	136	5165	407.28	81-25-4	221493		C00695	HMDB00619	5003200	53960596	18519064	63963912	19317670	8139101	22639066	4411632	50391676	30668740	41529572	5392620	2893985	7393470	58722528	1403588	57195864	45217032	18363780	3529205	9803522	57347232	10671736	36176240	35265744	25127944	5656130	871955	87272008	52185064	6006506	50988284	25085932	99367920	13345379	52460728
1589	cholesterol	Lipid	Sterol	63	GC/MS	266	2316.9	329.3	57-88-5	11025495	4937803	C00187	HMDB00067	46971604	43092764	60970676	47441584	48562968	57728292	52266916	57595740	54094084	56429600	45740572	54899300	68097120	49844852	48096268	40734364	54567104	75370376	47804304	58373912	48747780	55978368	77356736	61734028	40907076	65244100	43185972	56833092	56500736	60400596	51979032	39078120	56522728	37247880	51030832	44726288
1371	choline	Lipid	Phospholipid Metabolism	15506	LC/MS Pos	1256	675	104.107	67-48-1	305	149278	C00114	HMDB00097	83662776	85185168	103134432	75887608	87057848	106767200	131599104	163041472	113618848	121876176	162981056	85116808	116852488	79761160	86150832	98490072	105933776	114384320	65973744	120046048	193229280	118148808	135988016	117487384	91602488	127042552	128200984	118416512	149499520	137464384	154234000	123706304	134432224	147730672	164254080	92757608
1372	choline phosphate	Lipid	Phospholipid Metabolism	34396	LC/MS Pos	267	692.5	184.073	72556-74-2	1014	119298	C00588	HMDB01565	14336674	12747442	15407000	15580278	13325643	18787598	15450453	13153952	11838547	12963976	10954931	12104483	13218329	11158437	8814370	17398138	13860816	16026949	17344640	12829263	13521650	13099223	12935637	14049252	13920372	12756255	11734965	14572452	13516194	12154964	13362688	11737589	13039052	11300860	14106326	15234318
2740	cinnamate	Xenobiotics	Food Component/Plant	12115	LC/MS Neg	1259	2878	147.045	140-10-3	444539	392447	C00423	HMDB00930	921268	707165	602825	466920	791786	680101	804478	1044257	1135391	405854	2403528	889847	1513166	1566902	983311	462521	798753	492747	326869	626284	1605366	851069	985414	1145991	1042566	466650	617484	506337	464575	832789	941877	925188	955436	1902354	1501892	925301
2741	cinnamoylglycine	Xenobiotics	Food Component/Plant	38637	LC/MS Neg	100002253	3127	204.067	16534-24-0	709625	618829		HMDB11621	1350814	984130	975811	682883	909847	725346	1262589	1367868	671654	438411	1729144	1031908	1555348	955268	449256	785430	855890	439900	466014	787877	1780772	695039	1378070	898687	887519	887470	910891	726863	600154	635986	1280429	1244708	958057	1409717	2521829	1180259
1191	cis-4-decenoyl carnitine	Lipid	Fatty Acid Metabolism(Acyl Carnitine)	38178	LC/MS Pos	100002259	4468	314.233	98930-66-6					838630	755025	745739	988601	897834	367017	463218	543570	455316	533200	720317	977958	845856	1175281	1087701	454540	355359	322469	352745	324015	1052185	863494	1272170	996705	1402661	74719	355614	186813	274670	333636	575263	855503	818563	1059458	533200	575924
989	cis-vaccenate (18:1n7)	Lipid	Long Chain Fatty Acid	33970	GC/MS	100001228	1987	339.3	506-17-2	5282761	4445888	C08367	HMDB03231	736261	567056	672015	634979	686018	390378	531070	644117	899113	365916	624655	600637	950275	619222	668071	326436	663641	533364	583725	397475	672148	717213	1239856	540811	581679	607120	500669	757822	467288	541959	591656	490839	735784	454014	647209	317547
943	citrate	Energy	TCA Cycle	1564	LC/MS Neg	1124	582	191.02	77-92-9	311	305	C00158	HMDB00094	564605248	548985536	511082144	578979904	522333984	406089568	383984864	361632576	398577600	376498560	617062848	604691712	653953472	603795968	622734464	400619936	379637120	354004320	427265344	362042080	518712992	512622592	568501120	501844544	616453120	350765440	448986496	379706080	316758432	348083424	493317984	599657536	520844608	656075392	510831328	361632576
322	citrulline	Amino Acid	Urea cycle; Arginine and Proline Metabolism	2132	LC/MS Pos	391	730.3	176.103	372-75-8	9750	810	C00327	HMDB00904	113880072	119607072	121131712	133455936	112465088	114740720	91991440	101472520	105556768	109419232	102997648	113925136	109611024	100482016	98379600	83939240	115821440	111083824	106670592	105558928	125312528	127241960	111576616	123407104	115135248	107388616	115280344	115136096	103056472	111169160	110097720	113329376	106809304	110114288	118514800	101692688
1603	coprostanol	Lipid	Sterol	45986	GC/MS	100005346	2289	215.2	360-68-9		19951861			136884	50848	117030			166616	139944	147086	167351	71220				46319	90146	65927		167650	73183	62578			130222						99125	96988		117555	86760	72233	118773
1672	corticosterone	Lipid	Steroid	5983	LC/MS Pos	272	4851.2	347.222	50-22-6	5753	5550	C02140	HMDB01547	16615496	17165502	11641939	35008788	6580093	14720472	12041142	6061280	27433886	23325394	6515947	3103334	7542196	987274	12180095	20678418	1043671	689547	1089610	19535616	11092839	7873699	3951096	6132793	1803892	1789140	10529802	4318335	18278988	6928401	33630	319826	424742	4387001	293730	1406659
346	creatine	Amino Acid	Creatine Metabolism	27718	LC/MS Pos	1221	771	132.077	57-00-1	586	566	C00300	HMDB00064	1600607616	1300080128	1391023104	1238161792	1252937216	1332737152	1222058368	1181361280	1169670784	1394104448	1686353920	1256662656	1452091136	1376780928	1380486144	993450112	1234808320	1200360832	1216212224	995341952	1470843520	1388645888	1364483200	1403665408	1250022528	1214472064	1231556864	1216680192	1348383104	1474230656	1329008512	1379497472	1332230912	1478559872	1471302016	1030358720
349	creatine phosphate	Amino Acid	Creatine Metabolism	33951	LC/MS Neg	100000112	603	210.029	922-32-7	587	567	C02305	HMDB01511	2075827	2226362	2735382	2268953	2332784	2136381	2204824	2523368	2480246	2070472	1967717	2085377	1466310	705888		2171848	1953522	1877463	1701262	1981555	2220198	1975646	1381205	1971111	2215924	1872107	2500215	2824959	1598189	1742440	2705321	2356165	2346158	2566205	3007081	1740153
347	creatinine	Amino Acid	Creatine Metabolism	513	LC/MS Pos	275	730.8	114.066	60-27-5	588	568	C00791	HMDB00562	14477915	15902145	18589698	17429882	18325026	23843162	29970438	24884028	24787040	23460410	17248748	15957160	18674026	17112518	14832555	24336638	22527656	23608020	21050578	21349540	17536828	15120912	17124860	14928839	16291733	20695004	23108366	25173836	22679120	25116496	14109218	18354932	17542594	17970038	21450368	17584836
301	cysteine	Amino Acid	Methionine, Cysteine, SAM and Taurine Metabolism	1868	LC/MS Pos	800	736.4	122.027	52-90-4;56-89-3	5862	5653	C00097	HMDB00574	142154	144022	498592	252592	449755	55630	227782				76634	252178		112012	337795		801630	243819	134295	114694	500284	346058	233097	339358	164864	169048			749966							493280
373	cysteine-glutathione disulfide	Amino Acid	Glutathione Metabolism	46734	LC/MS Pos	100001437	824	427.095	13081-14-6	4247235	3455404		HMDB00656						1085968	1087666		518902	509082						551593		211410	198365	346909						664650	657597	440795	351115	387809					250615	155287
2373	cytidine	Nucleotide	Pyrimidine Metabolism, Cytidine containing	514	LC/MS Pos	827	1075.9	244.093	65-46-3	6175	5940	C00475	HMDB00089	129221496	123694608	131893840	124521720	134047216	89856400	107733752	115565152	83708952	103713520	148422672	135038128	152275392	139594976	130346944	79464832	121082560	103098400	95396208	89322640	170711728	139734592	158764544	131043608	129028680	102066272	87436600	91609104	121832936	110113224	139678112	138319776	141764064	138168352	167493680	84272264
2753	daidzein	Xenobiotics	Food Component/Plant	32453	LC/MS Neg	100001219	3566	253.051	486-66-8	5281708	4445025	C10208	HMDB03312	847943	2092375	685285	1530957	617789	170292	212716	171253	263864	170548	714079	995351	717082	654630	660968	56194	152064	251833	297994	186732	317534	1258464	636541	1082820	1024271	90950	206853	154697	437651	111424	528974	1061611	442187	1329837	601142	93017
2930	daidzein sulfate (1)	Xenobiotics	Food Component/Plant	48727	LC/MS Neg	100006362	2843	333.007						20811	42324	97307	100680	77198					14557	137439	173982	30632	168716	142884						61605	65313	77921	114924	87758				33112		81463	77560	30612	93284	150669
2926	daidzein sulfate (2)	Xenobiotics	Food Component/Plant	48728	LC/MS Neg	100006363	3330	333.008						336987	1017341	1203124	2173388	933955	40348	113762	176744	159397	141143	923971	3714656	553092	2414151	1519522	12163	123817	217957	160142	93426	395539	1120859	867089	816021	1480332		44156	70701	311995	42557	707230	1305651	647056	1987145	2135946	18027
2433	dehydroascorbate	Cofactors and Vitamins	Ascorbate and Aldarate Metabolism	34302	LC/MS Neg	301	739.6	173.009	490-83-5	835	812	C05422	HMDB01264	1447397	613362	3195721	1253004	5752048	510655		274757		342747	7959291	12673953	9112935	10853975	8774060	28229	1541993	233657	285695	12705	5805387	7035203	15031741	4698014	7885525	293074			837821	33367	1938193	43423	2022532	960917		91344
1201	deoxycarnitine	Lipid	Carnitine Metabolism	36747	LC/MS Pos	100001662	742.4	146.118	6249-56-5	134	705	C01181	HMDB01161	30148558	25899432	32594522	29391784	29869644	22986904	27131790	24179200	23651568	24534322	29396362	27943256	27704714	24085944	24255122	28487944	22379178	23931232	21710616	20870842	33129386	27766692	31264170	33073862	27005632	20196060	19319332	19406938	21657374	22084136	26871534	26487596	29105388	25291020	28469676	21694484
1764	deoxycholate	Lipid	Secondary Bile Acid Metabolism	1114	LC/MS Neg	302	5294	391.285	83-44-3	222528	389318	C04483	HMDB00626	1836877	2360989	2560812	1880147	1236050	1724548	3414351	1670741	18028886	4016002	2797751	2176256	1960688	2262580	4573834	520277	4583408	7969115	2560812	2485145	2752880	6744342	2945314	2233896	4242770	3745354	3331566	1191329	7215924	15270566	1181529	6986278	5902000	6924105	3121332	6679191
1028	dihomo-linoleate (20:2n6)	Lipid	Polyunsaturated Fatty Acid (n3 and n6)	17805	LC/MS Neg	1231	5730	307.264	2091-39-6	6439848	4944228	C16525	HMDB05060	97639288	67765176	51602660	95750080	78123208	40297244	31166854	44970484	62645480	31882048	82226216	86103112	98965832	60564828	84265088	33822812	44651644	31882786	64581828	43589268	91847536	86038016	84132800	66391432	102504424	51639584	60197912	61860440	44981660	40438076	58746664	129201984	78181640	93471696	78134488	51609276
1023	dihomo-linolenate (20:3n3 or n6)	Lipid	Polyunsaturated Fatty Acid (n3 and n6)	35718	LC/MS Neg	100001739	5596	305.249	17046-59-2	5280581	4471954	C03242	HMDB02925	88273176	79908656	63487368	94476984	102506192	100717632	46189204	82371656	127649016	50226820	112137888	125432416	125098096	52949380	110195064	53562696	67924128	75694552	85238384	102572464	126224824	102256952	169123792	86858056	111161024	89245056	136797440	86427312	68035448	105697032	93862560	158891744	119746640	118703376	127781448	84890728
2459	dihydrobiopterin	Cofactors and Vitamins	Tetrahydrobiopterin Metabolism	35129	LC/MS Pos	100001506	1515	240.109	6779-87-9	1879	1808	C00268	HMDB00038	3801848	3575779	5674307	3819441	4548466	1299945	1284542	1633249	987180	1675025	4257852	5705004	6344684	5904850	4165637	1016030	1490562	1662160	2409332	1026091	5324459	5021152	6564579	5890005	4613311	1596220	971565	637901	1408225	1184030	3489176	2846436	3238239	3428564	4918807	970206
2758	dihydroferulic acid	Xenobiotics	Food Component/Plant	40481	LC/MS Neg	100003432	1928	195.066	1135-23-5	14340	13701			55216	161060	207426	117016	267949	85016	255902		354472	190300	159475	188823	182077	393104	284162	143941	233453	179695	157271	74387	176323	716020	153019	166959	95001	232176	144075	82868	197503	136858	356995	193807	74987	293079	91667	101013
770	dihydroxyacetone phosphate (DHAP)	Carbohydrate	Glycolysis, Gluconeogenesis, and Pyruvate Metabolism	15522	LC/MS Neg	309	603	168.991	102783-56-2	668	3833110	C00111	HMDB01473	30835700	33884436	41503576	28113928	39624596	22995616	27754376	26042814	21352672	23417686	29115898	26925464	29392366	18477316	1665041	19991732	22440188	23219768	21192544	21308402	32551796	35153576	29867104	33630228	29997972	22857388	23474756	25072738	25816430	22195046	37529356	23725222	29279300	30796232	29508800	23500154
329	dimethylarginine (SDMA + ADMA)	Amino Acid	Urea cycle; Arginine and Proline Metabolism	36808	LC/MS Pos	100001810	810	203.15	102783-24-4	123831	110375	C03626	HMDB01539	10311053	9267235	10236465	10499443	9919093	7697135	7413589	7850133	6670063	6441344	10901516	8373122	9853996	8805350	9346287	6660223	7120094	6219082	6909395	6389094	12198090	9627973	10201390	10937393	9031198	7350535	8202565	7177819	6791067	7307367	9360782	11187869	9670504	10330501	11172830	7985306
5	dimethylglycine	Amino Acid	Glycine, Serine and Threonine Metabolism	5086	LC/MS Pos	806	719.4	104.071	1118-68-9	673	653	C01026	HMDB00092	11292813	15745026	11273126	10812853	9631430	10549237	10058654	9364023	8464645	12111671	12501528	11897100	11111512	11594217	9497343	8464645	12652873	8229147	9135697	8707301	14227670	12401639	11275508	10539243	8587512	11168874	8341779	9155725	13040725	12289910	10730136	9625657	8589014	11909173	12180740	9495301
1027	docosadienoate (22:2n6)	Lipid	Polyunsaturated Fatty Acid (n3 and n6)	32415	LC/MS Neg	100001182	6034	335.296	7370-49-2	5282807	4445934	C16533	HMDB61714	3801878	2436218	1888335	3213273	2528205	1478950	1340513	1162743	2177304	1567211	3036175	2930806	3045417	2241053	3798421	1609436	1515552	1099379	2049319	1394854	3115574	3273892	2465811	2824537	3274785	2193217	1881154	2309519	1714357	1661497	2232589	3481149	2566097	3364006	2852740	2199993
1015	docosahexaenoate (DHA; 22:6n3)	Lipid	Polyunsaturated Fatty Acid (n3 and n6)	44675	LC/MS Neg	100000665	5525	327.233	6217-54-5	445580	393183	C06429	HMDB02183	40756640	127256816	77387864	68752864	88148016	282765952	152955056	181404256	311253088	145753984	174652848	116237736	124841464	15146304	130897672	142698464	151114592	187026880	175232064	257091600	256222320	154779024	129057352	163825632	81341008	238970080	389871872	258235696	162652160	273280768	154629008	189105904	169702432	155197728	180949104	178947200
1014	docosapentaenoate (n3 DPA; 22:5n3)	Lipid	Polyunsaturated Fatty Acid (n3 and n6)	32504	LC/MS Neg	100001181	5571	329.249	2234-74-4	6441454		C16513	HMDB01976	14424240	29332888	15340769	19081784	24100334	58407004	25390652	34365576	82087864	23861024	56557988	46266424	41377680	5541494	29643198	30693642	33067966	40624140	44779736	55914804	83320272	45787736	57296124	40596812	22006416	42317820	66886812	41297508	30363692	58464864	41483876	47332492	43942028	42502764	61302144	42237584
1026	docosapentaenoate (n6 DPA; 22:5n6)	Lipid	Polyunsaturated Fatty Acid (n3 and n6)	37478	LC/MS Neg	100001580	5624.5	329.249	25182-74-5	6441454	4945614	C16513	HMDB13123	85096216	118207456	77112448	96238440	106914192	154078272	64073360	93327656	144109360	69482024	166727136	144943616	135766336	25517588	153481296	73628512	103488184	115340096	139543280	118745120	186582416	149241728	158111456	157840464	105675472	124209784	151645968	104181760	90416880	129486872	157870304	198757744	144705520	145943696	138681952	108590832
1016	docosatrienoate (22:3n3)	Lipid	Polyunsaturated Fatty Acid (n3 and n6)	32417	LC/MS Neg	100001195	5823	333.28	59708-86-0	5312556	4471981	C16534	HMDB02823	1550769	1480393	1120004	1922411	1471769	744541	535637	699208	1392711	313795	2164842	1589653		757205	2370163	505698		179829	1814081		2296169	1794752	1166537	1337970	1939237	314658	1188753	1042053	931933	637773	1823316	2122634	1430313	1810238	1363017	1667770
3294	ectoine	Xenobiotics	Chemical	35651	LC/MS Neg	100001635	796.6	141.067	96702-03-3	126041	112069	C06231		4239067	2217649	2186792	3179672	2593243	2653281	5391954	4845918	2822569	2768658	4662321	2767570	3436931	2071311	2458731	3802473	2746590	2214913	5215162	1787082	5894079	1463444	2593294	2190992	4679744	1909224	2417800	3853235	3415193	2167723	3948228	4206081	3275258	5534734	3816623	1406527
3295	EDTA	Xenobiotics	Chemical	22163	LC/MS Neg	100001002	643	291.083	60-00-4	6049	5826	C00284	HMDB15109	4501955584	3831258368	3049842944	3914162944	3796183552	3827255296	3309091328	3664049152	3846680064	4141780992	4265302784	4999106560	5730405888	7095890944	7920326656	3774784256	4867726848	3812621568	5052086784	3490384128	3593718016	3836459520	5022022144	3981463808	4893998592	4072297984	4135636992	3163842816	3229238016	3897327104	3156404480	4566042624	4111201792	5214922240	3015057920	2538708480
1013	eicosapentaenoate (EPA; 20:5n3)	Lipid	Polyunsaturated Fatty Acid (n3 and n6)	18467	LC/MS Neg	2050	5450	301.217	10-2005-9;10417-94-4	446284	393682	C06428	HMDB01999	21108666	20158584	11145817	19800370	23943756	21336112	21071110	24812572	44702560	20531454	44706936	22070842	35971776	7195801	34542880	25372166	24717516	17790382	32661946	28995422	84873560	33771656	30627902	25372532	26089142	37910036	35785672	34888292	26158212	33573828	38760052	63322800	36579360	33113262	62523276	31373896
999	eicosenoate (20:1n9 or 11)	Lipid	Long Chain Fatty Acid	33587	LC/MS Neg	100001335	5950	309.28		5282768	4445895		HMDB02231	151122848	56348944	48973832	112551808	84886000	67920744	42613092	60609252	120778472	65624708	82623680	88466808	126816976	90231008	119507528	45585536	67206320	49742056	65566184	89941744	97903752	104013904	113488776	78619232	108321256	100343080	81083272	120179104	59505832	60157652	58415388	120612288	84567320	106510040	76296200	95798408
2764	equol	Xenobiotics	Food Component/Plant	36774	LC/MS Neg	100001725	4565	241.087	94105-90-5	91469	339332	C14131	HMDB02209	22577	22109	21761		17164						22109	32003	21529	23409								18963	22457	12771	34500				19917	28201	8873	24408		25675
2765	equol glucuronide	Xenobiotics	Food Component/Plant	41948	LC/MS Neg	100003895	3215	417.119					HMDB41731	23903960	18010756	18112014	12914478	14261694	11723108	8544725	9441250	11319851	10892443	22375510	16051732	20898380	16283589	17836424	2345443	13335833	16945000	10764081	7563640	10641374	11920569	17824078	20439676	20321428	10832836	11619066	10641374	19381908	17686806	12897915	17347244	11793025	18126890	17219392	15461819
2766	equol sulfate	Xenobiotics	Food Component/Plant	40478	LC/MS Neg	100003429	3630	321.044			23936050			36855	85436	203502	194938	164988		256897	88260	113867	113867	310609	666100	73867	747260	754321		88282	96700	119274	30210	89043	137802	106585	199637	405872	24970	33873	74750	354184	360265	118600	208222	279582	276595	618863	234945
2767	ergothioneine	Xenobiotics	Food Component/Plant	37459	LC/MS Pos	100002154	823	230.096	58511-63-0	3032311	2297320	C05570	HMDB03045	30922938	43113712	85939264	32746484	76856824	46956612	55079608	103329096	84294848	44469188	38507152	25771278	49046084	34141380	17553140	40697944	47032956	93258096	30779968	34250272	27075984	23016760	50498692	27299372	28484870	39777796	48832304	93906760	63615148	103615280	26894368	31978928	57306888	22350130	55880796	11973235
1003	erucate (22:1n9)	Lipid	Long Chain Fatty Acid	1552	LC/MS Neg	1087	6355.6	337.311	112-86-7	5281116	7924	C08316	HMDB02068	25826004	6001084	6387513	11408208	8234112	6130640	6839473	6572990	12411905	14485078	13678731	10601360	22840368	11698393	36701136	7933628	8078452	5927792	6678710	9051632	21117816	16822520	13016229	18864514	10255344	8115592	10651974	15166462	10181962	8927811	6332742	14279544	11386197	15908957	11015781	14814132
2769	erythritol	Xenobiotics	Food Component/Plant	20699	GC/MS	100000846	1517.5	217	149-32-6	222285	13835932	C00503	HMDB02994	451034	648874	621299	535132	550170	422460	461982	376465	346676	348294	620896	536389	629641	472436	520628	243261	409463	297203	306670	447367	468676	667188	673471	567608	413523	339455	306708	354977	340414	312445	415110	401925	408320	360979	550241	240954
936	erythronate*	Carbohydrate	Aminosugar Metabolism	42420	LC/MS Polar	100001320	2186	135.03	88759-55-1	2781043	2061231		HMDB00613	207304512	176732992	212944912	198689728	196029200	124783136	139944560	139342304	124476888	148759024	223517984	215711648	224244400	205091808	205485056	111263672	105437704	126537352	135658880	112387360	215459136	184630240	221233488	210299568	189092320	159099120	140031968	156458592	139972736	129287432	160809728	192271104	168619680	189038560	208048736	118869152
1377	ethanolamine	Lipid	Phospholipid Metabolism	1497	GC/MS	420	1304	174.1	141-43-5	700	13835336	C00189	HMDB00149	1405574	1098758	1355909	1119967	1414681	1682101	3406660	4717497	1649437	1720126	3552326	1125353	2780944	824369	2298184	1398584	1555156	994843	1123731	1374843	4743029	1886437	2985357	1953822	2158136	1406736	2579407	2330468	2627705	1486043	3088135	3976657	3169304	2823589	4000720	784685
273	ethylmalonate	Amino Acid	Leucine, Isoleucine and Valine Metabolism	15765	LC/MS Polar	2054	2785	131.035	601-75-2	11756	11263		HMDB00622	30568044	38606100	44546212	46453668	37098588	34497696	30720004	25834464	24555224	19718730	38359000	61421204	41577992	34160200	33931992	27216614	26429100	30860244	31583250	32377358	30582548	27977804	48989352	39470080	52859316	30888834	28619156	33025276	27402612	26330736	38451576	38043736	34497696	33050422	38319840	24818506
2772	ferulic acid 4-sulfate	Xenobiotics	Food Component/Plant	47114	LC/MS Neg	100005389	1225	273.007	86321-29-1	6305574	4878542		HMDB29200	13758524	13427401	19646424	17545378	15929949	12107449	6800011	4663811	11375165	10545339	10408719	16214965	15479610	18287540	11177559	1909768	9876232	20555836	9144532	8263314	9736635	18692676	18152590	15789611	12527983	10815501	8794260	6381690	13272518	6600983	11786127	11039251	8117117	9652237	10170809	3399796
2422	flavin adenine dinucleotide (FAD)	Cofactors and Vitamins	Riboflavin Metabolism	2134	LC/MS Neg	327	2425	784.15	146-14-5;84366-81-4	643975	559059	C00016	HMDB01248	210357	220323	216352	251557	201031	166478	168416	159170	166357	205946	234460	266945	280108	218690	242355	130754	175726	137325	201639	151235	251827	262392	258251	240911	253320	179138	191886	171231	195204	166328	229180	262922	219840	277197	295705	107957
865	fructose	Carbohydrate	Fructose, Mannose and Galactose Metabolism	48195	LC/MS Polar	878	2022.2	225.062	57-48-7	5984	5764	C00095	HMDB00660	21386830	21573194	24687174	21156160	22724328	12280671	13506529	12691653	12210694	6063153	18750092	19619684	19742494	9763669	16140286	9112025	12607639	13671732	9724703	11070169	15735542	15138804	19789124	20715062	18752872	11713822	11411024	12859996	13665659	11346376	13431381	12940274	14549980	16694054	12682015	4293687
815	fucose	Carbohydrate	Pentose Metabolism	15821	GC/MS	918	1682.2	204	2438-80-4	19466	2299091	C01018	HMDB00174	331369	335192	475709	369617	310365	361728	621257	574211	523605	517713	395567	563054	630728	465098	425388	400183	471358	620521	379435	489473	566606	539476	759890	488052	475371	601990	427020	510494	350208	408588	417482	450242	391948	438929	754314	388516
1615	fucosterol	Lipid	Sterol	21187	GC/MS	100000930	2380.1	386.4	17605-67-3	5281328	4444705	C08817	HMDB02374		56091	74675	53286	38154	156369	80540	107380	127786			40242	74404	46493		95748	94641	133141		115802		46030	103800	75335	48693	92113	70131	169286	116575	145776		85410	74959	56850		60067
952	fumarate	Energy	TCA Cycle	1643	LC/MS Polar	330	3084	115.004	100-17-8	444972	10197150	C00122	HMDB00134	138001776	133351408	149688960	116542856	141920208	84241560	83137992	129351184	48378504	114129680	157712208	140933008	170557808	145877648	101789704	72552736	89897392	86884680	66748120	85104512	180957776	183152384	182838848	168473888	128847216	90938944	67503992	80818488	170058624	89263384	145663744	130146520	125921736	139736752	126086520	99401928
889	galactonate	Carbohydrate	Fructose, Mannose and Galactose Metabolism	27719	LC/MS Polar	100001026	3085	195.051	299-28-5	128869	114198	C00880	HMDB00565	12419727	14044580	13108784	16557644	9374782	13556449	11587992	13835118	11617159	23613004	12863011	8933737	13560968	4835046	15326745	13941758	13450604	13435482	7020321	14912801	15051928	17448614	16723108	26829556	9711100	19759008	19632456	14123129	16122551	11856270	12505731	13632625	20183614	16028055	14233200	22523192
2446	gamma-CEHC	Cofactors and Vitamins	Tocopherol Metabolism	44876	LC/MS Neg	100002094	3843	263.129	178167-75-4	133098	117455		HMDB01931	69937	57464	29260	12291	32405	49893	37265		44898	27462	74187		33091				43439	34520	46100	24496		24598	43243	47530	21565		77391	28309	66497	73649	19416	35399	6630	57666
2447	gamma-CEHC glucuronide*	Cofactors and Vitamins	Tocopherol Metabolism	42381	LC/MS Neg	100004243	2500	439.161						70469	68145	54130	60610	49446	28849		32808		10264	108137	44391	78088	36577	46043		41454	55797	28897	23296	51738	43931	80631	123692	41488		43869	33609	49177		58091	64310	38200	69768	33414
386	gamma-glutamylalanine	Peptide	Gamma-glutamyl Amino Acid	37063	LC/MS Pos	100001843	1116	219.098	5875-41-2	440103	389104		HMDB29142	1158182	1768206	1920141	1605887	1883643	1013950	846228	890954	781727	790345	1565298	2326551	2248911	2475426	1098560	425507	1003541	1364032	1180573	955533	1016697	1478497	983922	953001	1143054	375062	621382	723879	891021	760722	811882	804140	784560	932470	971632	311470
387	gamma-glutamylcysteine	Peptide	Gamma-glutamyl Amino Acid	1778	LC/MS Pos	1036	1263.5	251.07	636-58-8	842	819	C00669	HMDB01049	100929	185913	732544	207189	900675	196915	111028	234848		116378	1177155	649323	593525	730702	1006863	76644	391941	282646	282477	128390	799427	611329	586575	652098	703214	298937	146325	277090	467757	278491	117915	220096	334531	291035		268833
388	gamma-glutamylglutamate	Peptide	Gamma-glutamyl Amino Acid	36738	LC/MS Pos	331	1045	277.103	1116-22-9	92865	83831	C05282	HMDB11737	6852435	5531488	8575548	5709875	6892249	6240026	5861256	8416227	5411459	6579776	9342504	6343313	6092226	6046420	5105686	4628608	5263158	6559131	5663171	6029189	8171477	6612577	8402842	6454437	5716588	3738967	3757751	4320973	5082970	3896738	6961061	7366182	6390107	6171630	8790565	4274614
392	gamma-glutamylisoleucine*	Peptide	Gamma-glutamyl Amino Acid	34456	LC/MS Pos	100001485	2661	261.144		14253342	21403145		HMDB11170	2378102	2196032	2071108	2301117	1741329	1347881	1270384	1329090	1291536	1505682	2242806	2671277	2078796	2175050	2025896	866243	1516736	1078917	1464932	1160205	2148589	2544660	2218219	1895826	1886058	1218634	1210987	1227224	1647898	1451223	1862597	1931325	1671599	2246472	2124357	1092862
393	gamma-glutamylleucine	Peptide	Gamma-glutamyl Amino Acid	18369	LC/MS Pos	1268	2757.2	261.144	2566-39-4	151023	133115		HMDB11171	15173622	13735109	14969937	15435215	10934326	9777083	8194502	9995211	8387109	8799279	13641988	15876854	14449447	12930277	12205774	5195449	8499213	7108618	8435648	8075127	14151776	17288346	15844264	12471396	12063681	8680747	8539691	9779183	11456380	9965571	10707215	11998332	11347642	13766590	14181527	7112435
395	gamma-glutamylmethionine	Peptide	Gamma-glutamyl Amino Acid	44872	LC/MS Neg	100001313	1268	277.086	17663-87-5	7009567	5373147		HMDB29155	192569	165306	178152	191599	200258	231056	257672	259111	213042	76623	288407	200567	269699	133006	88269	194786	188838	150256	345332	139366	323914	131776	206867	117586	256963	148169	191426	201996	223927	183548	137163	195703	180343	235765	240473	45669
396	gamma-glutamylphenylalanine	Peptide	Gamma-glutamyl Amino Acid	33422	LC/MS Pos	100000491	2865	295.129	7432-24-8	111299	99868		HMDB00594	4099343	3532349	3273187	3533812	2773919	3102853	2858432	2765435	2522064	2950756	3409043	3745440	3365810	3004983	2773003	1819109	2599682	2689208	2517226	2718272	3505903	3728863	3401164	3117653	3072037	2788598	2442999	2431424	3298880	2557441	2593399	2983743	2424017	3346523	3384750	1955927
397	gamma-glutamylthreonine*	Peptide	Gamma-glutamyl Amino Acid	33364	LC/MS Pos	100001314	996.6	249.108	5652-48-2		21403107		HMDB29159	5155277	3412897	4033280	3295293	3503137	2741933	2332771	3083112	2516458	3749472	4283727	3597841	3697883	3346641	3464803	2695526	3046783	2902918	3115942	2343823	4134498	3672214	2914868	2841702	2410818	1590001	1676638	1587521	2203884	2125228	2652947	3015183	2666449	3031972	2667378	2011657
398	gamma-glutamyltryptophan	Peptide	Gamma-glutamyl Amino Acid	33947	LC/MS Pos	100001295	3035	334.14	66471-20-3	3989307	2302065		HMDB29160	558649	427721	439329	478641	367142	438715	389051	306551	419475	422363	532088	498564	404193	414499	392072	296503	401603	297444	292442	310624	410641	455777	414701	455997	363354	374497	337541	397855	444184	395580	294186	433950	366023	445349	390954	265413
399	gamma-glutamyltyrosine	Peptide	Gamma-glutamyl Amino Acid	2734	LC/MS Pos	1102	2080.4	311.124	7432-23-7	94340	85142		HMDB11741	2233966	2226229	1899384	2327851	1471845	1786606	1247132	1541437	1619050	1936455	2304837	3091382	2090157	2042398	1805043	752638	1660042	1261714	1151690	1496383	2941421	2406179	2237030	1958706	1580551	1516473	1313512	1151690	1821777	1405406	1398840	1441485	1285537	1872091	1675268	1023610
400	gamma-glutamylvaline	Peptide	Gamma-glutamyl Amino Acid	43829	LC/MS Pos	100001126	2045	247.129	2746-34-1	7015683			HMDB11172	5113749	4659329	5272937	5775996	4011256	3082110	2349503	2547905	2738013	3194526	5225591	7140813	5878292	5470024	5042451	1621838	2631250	2241484	2479623	2434098	5235318	5993716	6049504	4301604	4374139	1920671	2197056	2838944	2691842	2578007	4086747	4007219	4001892	4384633	4726089	1697275
2443	gamma-tocopherol	Cofactors and Vitamins	Tocopherol Metabolism	33420	GC/MS	100001308	2264	488.4	54-28-4	14986	14266	C02483	HMDB01492		19432	28524	18386	17319		23674	19024				38839	37814				24566	24228		18493		35302	59187	24165	16559	11364			22574	21183		14150	15269	20370		10379
2634	genistein	Xenobiotics	Food Component/Plant	32448	LC/MS Neg	100001221	3754	269.046	446-72-0	5280961	4444448	C06563	HMDB03217	399124	1296051	362516	771517	308044	35308	106993	69653	120609	38070	347062	430199	340769	273329	300983		80922	124829	148795	39232	104552	622293	317255	482920	509861	13197	56413	86483	183370	43717	213495	577568	258850	766602	423065	52697
2701	gluconate	Xenobiotics	Food Component/Plant	587	LC/MS Polar	338	2922	195.051	527-07-1	10690	10240	C00257	HMDB00625	5128226	8136185	9257363	7821859	8840093	7495244	8830932	6677005	4064547	4708039	6918384	11099543	6900061	5977845	15990658	2233342	3221438	9685505	5907690	5864995	7536792	9985511	10676778	6334389	8941615	7841622	5781196	5447333	5955343	5860157	6916416	5995879	5247669	7196195	6339792	6914967
761	glucose	Carbohydrate	Glycolysis, Gluconeogenesis, and Pyruvate Metabolism	20488	LC/MS Polar	572	2342	179.056	50-99-7	79025	71358	C00031	HMDB00122	2334742272	2388605184	2572758016	2243061504	2437602816	2476493312	2444138240	2571220224	1488336512	2913059840	3259083520	2656126720	2516246784	2669621248	2563088128	1959697408	2585738240	2507275776	1949060992	2431067392	3033177600	2710528512	2903688192	2875465728	2249064704	2632469248	2271518464	2065605888	2768193024	1802593408	2393015808	2507273216	2206114816	2377684224	2697318912	2354992640
913	glucuronate	Carbohydrate	Aminosugar Metabolism	15443	LC/MS Polar	100000257	3233.3	193.035	207300-70-7	444791	58552	C00191	HMDB00127	8123316	11908442	11868339	14576373	10409931	9668405	8436377	6929499	7217653	5533897	8514585	15093273	9972639	8408676	9476309	5371577	6056065	10308773	6606182	9292166	6742554	9551837	12155391	9777149	12312267	8108982	7505408	8240320	6379412	7194221	8937022	7716894	7414334	8117932	10396421	5980825
36	glutamate	Amino Acid	Glutamate Metabolism	57	LC/MS Pos	561	710	148.06	56-86-0	611	591	C00025	HMDB00148	271614880	258810304	357182496	279496896	295336352	263546496	256954528	333534400	183361648	259256096	388316320	309787168	320343904	312056416	259289776	181642656	259701904	290264608	208334720	262996528	364472736	306186368	415480096	299397664	286904896	270209280	262543408	270682752	361323232	238141312	334575744	345163744	312221952	305212384	365805920	208025520
46	glutamate, gamma-methyl ester	Amino Acid	Glutamate Metabolism	33487	LC/MS Pos	100001103	1068.8	162.076	1499-55-4	68662	66546			1933159	1976716	1463763	2198386	2078512	1767816	1263600	1953064	1395956	1940422	2075157	2454708	1355202	1556573	2238480	1382975	1685877	1574014	963886	1928709	2704082	1703531	1600663	2472973	1750729	1343455	1001431	671220	1546155	1632214	1927591	1848592	1176207	1149281	1465985	1174448
37	glutamine	Amino Acid	Glutamate Metabolism	53	LC/MS Pos	563	680	147.076	56-85-9	5961	5746	C00064	HMDB00641	365134400	371931008	425601664	370908192	335979872	354598912	349488416	362783552	307205216	333457440	408696512	450638976	396658976	395666368	406075424	277015264	318163200	368827584	314910144	345759424	421110592	407721344	477922336	408215424	397788256	339418400	337855424	371675552	367006944	379360384	405413536	404989856	372892864	391535872	395383456	344100128
485	glutamine-leucine	Peptide	Dipeptide	42994	LC/MS Pos	100003160	2195	260.16			16568303		HMDB28801	92105	93321	110867	171150	168757	178848	107375	172784	100076	132545	187494	181858	379043	99744	188315	135239	109835		165419	125753	117166	86282	50542	129239	117326	78962	70999	94879	106722	119781	50035	120656	80333	107451	265955	73704
80	glutarate (pentanedioate)	Amino Acid	Lysine Metabolism	396	LC/MS Polar	339	2900	131.035	110-94-1	743	3618533	C00489	HMDB00661	56211124	41403516	45704428	40085872	44570208	31028614	23135092	33875488	15333834	54058804	51731668	31853500	50088152	42826656	29069656	20203526	53409692	46605476	26329920	24815224	30908416	41592028	32343498	54606572	39514444	22272202	19571310	20509048	61912196	17707910	29788492	29573330	28100092	31716412	29791152	27212112
81	glutarylcarnitine (C5)	Amino Acid	Lysine Metabolism	44664	LC/MS Pos	100001593	1583.3	276.144	102636-82-8	71464488	21403175		HMDB13130	136428	85621	186117	236925	125762	310654	124371	183659	104004	149906	113162	102084	121447	137245	194015	169391	150348	259951	156848	101106	59802	60131	98598	78623	70070	113592	134183	211795	97694	127124	65278	96419	130459	102481	119964	91824
371	glutathione, oxidized (GSSG)	Amino Acid	Glutathione Metabolism	27727	LC/MS Pos	448	1512	613.159	103239-24-3	65359	58835	C00127	HMDB03337	239560192	253075616	240962816	235365696	200003936	284803392	271772640	227843712	264414928	260729536	231193152	183123680	210574448	163630928	189614592	239060656	242596720	265034800	269689312	237714128	225728016	200689440	167134576	225259088	144992896	234573920	247855488	241229344	240100736	233140384	230157392	229911216	228588192	215640096	269293088	206358240
370	glutathione, reduced (GSH)	Amino Acid	Glutathione Metabolism	2127	LC/MS Pos	496	1270	308.091	70-18-8	124886	111188	C00051	HMDB00125	77035296	119942912	550497152	124833024	651226752	42154480	52213044	129220504	10946908	53770076	331232576	310617728	367128064	370132640	426684544	40003920	158571056	159759040	90079896	32417948	347943680	213716640	582640704	176603168	309959264	57398324	32271762	29744096	75607944	44857668	62400616	61607652	167108848	140311728	60613896	80819168
781	glycerate	Carbohydrate	Glycolysis, Gluconeogenesis, and Pyruvate Metabolism	1572	LC/MS Polar	1052	2070.4	105.019	600-19-1	752	732	C00258	HMDB00139	21900336	28952812	27750178	26653922	25099682	25377672	25909848	25953070	19783784	21407362	28446168	37752380	29281350	35041600	23985818	14586404	34610824	28552514	29629186	21529310	36712764	26783978	34748620	31788498	36250052	62163604	40906312	27326732	42089972	49137800	35317792	28699790	26614400	25431480	36005948	26379400
1512	glycerol	Lipid	Glycerolipid Metabolism	15122	LC/MS Neg	1254	758	91.0401	56-81-5	753	733	C00116	HMDB00131	11036247	7623255	7846350	10522390	9378754	11369509	11429232	12391836	14944854	11794545	15631072	11968085	13574845	12037308	16844120	9049148	8517059	9210113	9881263	8900545	15685113	11817942	14342064	10444716	12432720	10173667	9098759	10570281	12063160	11843817	10611203	13008003	13183929	11752844	12437932	8092726
1513	glycerol 3-phosphate (G3P)	Lipid	Glycerolipid Metabolism	43847	LC/MS Neg	100000258	613.2	171.006	29849-82-9	754	734	C00093	HMDB00126	2243340	3390258	5544323	2983897	3540996	2931345	3609646	2524244	1507121	2090147	3698079	2434245	2457770	780132	2374486	2044614	1710192	2271577	1686811	2173327	4982389	4006085	2666154	3439001	3000648	2064827	1930636	2315595	4173408	2524377	4088212	2226258	3121646	2426385	4646677	2893443
1380	glycerophosphoethanolamine	Lipid	Phospholipid Metabolism	37455	LC/MS Polar	100001620	3075	214.049	33049-08-0	123874	110410	C01233	HMDB00114	4848145	6275063	7312764	8484948	8046970	8181191	7794288	6524905	6242886	5908692	4888534	6676756	5566989	4896009	4113459	6188383	5507686	7937173	6813150	7051342	6266969	6406965	7702190	5998996	9533383	11092113	9190512	10748766	9699258	10910098	6614859	6027519	6162411	5537414	7660982	8632949
1518	glycerophosphoglycerol	Lipid	Glycerolipid Metabolism	48857	GC/MS	100001619	1969	357.3		439964	388990	C03274		48766		87384	95585	82006			32941	84050	40142	53145	94814	101273	62121		59749	42136	86174			54849	119746	119741	66697		70165		108816	67540	100635	76324	67593	77666	77045	96901
1374	glycerophosphorylcholine (GPC)	Lipid	Phospholipid Metabolism	15990	LC/MS Pos	100000269	709.9	258.11	28319-77-9	71920	571409	C00670	HMDB00086	63819992	50803800	58660276	55668792	48997836	45707976	51484404	46004920	45976168	47158048	50062600	60179592	51537852	60120032	48716216	49066736	42427956	40694224	48316268	49668300	66501940	66665792	67871712	56304012	60713328	88445464	86703928	82820016	83372576	87638832	60631312	69433768	67996728	75770248	69569680	67400032
1	glycine	Amino Acid	Glycine, Serine and Threonine Metabolism	58	LC/MS Pos	340	700	263.147	56-40-6	750	730	C00037	HMDB00123	1139868	1049624	1160589	1429476	1194229	1256944	1213210	1100697	1412899	1126640	1133304	1469580	1112515	1285590	1275479	1292387	932618	1131340	1246769	1296706	1362651	1357271	1019895	1545365	1079290	978366	1087940	1239029	881168	1414366	1455978	1159993	1383992	1242249	1331672	950446
1757	glycochenodeoxycholate	Lipid	Primary Bile Acid Metabolism	32346	LC/MS Neg	1628	5236.1	448.307	16564-43-5	12544		C05466	HMDB00637	1780837	7310734	12468119	7334568	8135215	1419174	1828260	4698563	5260033	2495622	33477140	7898296	5402759	13975750	22030242	921268	1889118	12699301	466001	993744	7138214	17676236	40996892	15806179	14134164	1929270	475593	1542713	6410017	8536985	4983327	12566431	13002380	18206254	11017255	6867947
1754	glycocholate	Lipid	Primary Bile Acid Metabolism	18476	LC/MS Neg	342	5163	464.302	475-31-0;863-57-0	10140	9734	C01921	HMDB00138	14872465	29622074	19268778	44854268	19614470	14022431	8324139	25567626	13066793	11802920	66346408	26842116	18196368	52151168	67625648	6423181	12511043	37203036	2561263	9578878	39468532	67680632	66678312	60770004	34009224	10402700	3968704	9812639	28902194	11892796	25368940	31277918	25107612	55892728	25743442	23239670
1765	glycodeoxycholate	Lipid	Secondary Bile Acid Metabolism	18477	LC/MS Neg	100000436	5281	448.307	360-65-6	3035026		C05464	HMDB00631	223570	1536091	1899480	1524651	828474	533073	1122745	1231409	3649287	1248787	6426938	1663007	548688	2207050	6551519	137725	739793	7525001	244083	189205	1465171	5212594	7796240	4520680	5526000	2054161	187654	94272	4467251	3709923	872944	6808844	4331353	4225107	1379900	5407796
1788	glycohyodeoxycholate	Lipid	Secondary Bile Acid Metabolism	43501	LC/MS Neg	100003868	5070	448.307	13042-33-6	114611	102648			1791785	5320389	4026627	8438082	5679626	3469600	7480762	12479712	7043230	4648130	20494800	9663285	4420636	7108338	25206072	2410445	5825417	21975100	617108	1721641	9536753	17440796	27285040	23239452	12124132	1643574	812732	1255881	27253914	9938895	6920480	21789714	14393716	11073821	12656949	6390106
3299	glycolate (hydroxyacetate)	Xenobiotics	Chemical	15737	GC/MS	203	1119	177	79-14-1	757	737	C00160	HMDB00115	410726	347113	414631	327194	375332	366030	490561	391104	334787	341393	414837	422192	445343	344066	516372	230391	299844	305142	357512	341018	341323	405656	449337	374023	320665	339566	254738	334480	291725	314559	284391	404932	366701	370788	302004	221113
1770	glycolithocholate	Lipid	Secondary Bile Acid Metabolism	31912	LC/MS Neg	100001064	5357.1	432.312	474-74-8	115245	103116	C15557	HMDB00698			56063						71404		427968	99969			216770			391589				267239	216970	167544	231254				308102	247240		255230	44488	167544
1771	glycolithocholate sulfate*	Lipid	Secondary Bile Acid Metabolism	32620	LC/MS Neg	100001657	5011	255.631	15324-64-8	72222	65188	C11301	HMDB02639		44051	28274	84572							150608	93270		91166	169738			326546				213580	337323	125281	126316			25996	89272	122196	23018	218533	119460	149034	204301
1776	glycoursodeoxycholate	Lipid	Secondary Bile Acid Metabolism	39379	LC/MS Neg	100002911	5033	448.307	64480-66-6	12310288	19973534		HMDB00708	80775	365985	423667	476388	288317	39339	71887	213319	206709	98265	991097	344700	222168	628551	836711	24274	116088	489054		50666	552210	1060411	1148046	580337	613184	34618		11044	575084	397527	211572	733520	513593	941672	530003	278938
497	glycylisoleucine	Peptide	Dipeptide	36659	LC/MS Pos	100001790	2080	189.123	19461-38-2	88079	19972556		HMDB28844	274641	480287	470042	483570	550308	535675	500220	576069	547553	478422	464872	687671	571684	608651	629774	279149	457164	369361	582815	352653	433636	469765	321801	509550	550036	437081	388630	432396	447496	554452	414629	425209	373420	349016	482395	266387
498	glycylleucine	Peptide	Dipeptide	34398	LC/MS Pos	100001258	2190.9	189.123	869-19-2	92843	83812	C02155	HMDB00759	237700	248904	312805	180824	312849	83217	69368	118162	15054	82766	268303	289564	232484	261254	179544	51588	123085		137965	44209	171092	192247	259917	343179	242784	170000	80528	98427	167850	90152	197339	183699	154368	117920	388873	57398
508	glycylvaline	Peptide	Dipeptide	18357	LC/MS Pos	100000487	1561.6	175.108	1963-21-9	97417	2006926		HMDB28854	22149	83732	74115	97895	158258	139697	72652	116347	74842	138850	96710	154515	145280	133846	185030	40045	128357		136833	104005	98885	119790	157949	138180	102061	91974	68008	82881	97735	141527	62761	79032	78466	53624	101958	31808
352	guanidinoacetate	Amino Acid	Creatine Metabolism	43802	LC/MS Pos	344	711.2	118.061	352-97-6	763	743	C00581	HMDB00128	3033552	2792783	3167862	3494413	1729570	1550561	1530587	1994827	2458109	1981956	2486427	2291600	2468301	2539863	3963115	2215809	1987688	1010977	1913381	2321443	1751250	2619781	2224380	3074117	1356058	2016030	1551041	1665436	2978416	2013796	2237409	2712603	1889925	3736077	2046046	1539964
2316	guanosine	Nucleotide	Purine Metabolism, Guanine containing	1573	LC/MS Neg	1099	1662	282.084	118-00-3	6802	6544	C00387	HMDB00133	288178	220686	227499	467604	269326	586084	533323	528368	391012	882674	187511	368068	454560	453176	541834	477711	798328	492565	1031715	922591	273096	365406	473611	258507	488196	2952900	2087336	2246866	2282569	2188978	179945	188497	215579	444314	375737	2281768
2311	guanosine 5'- monophosphate (5'-GMP)	Nucleotide	Purine Metabolism, Guanine containing	2849	LC/MS Pos	347	1300	364.065	5550-12-09	6804	741	C00144	HMDB01397	7093386	9001439	8111175	7990316	6688404	10471779	10063341	6113611	8958998	8009558	7043899	6224874	5673324	5096598	2525388	8072365	6158257	10511281	10239150	8808567	5961723	6012537	3902869	6285437	5311232	11006341	10099918	12468848	11293559	12504569	7348801	4871013	4578850	5264130	7630788	6918093
899	guanosine 5'-diphospho-fucose	Carbohydrate	Nucleotide Sugar	15903	LC/MS Neg	335	755	588.075	15839-70-0		21402997			680791	709908	723990	808294	714022	817501	735123	549392	707911	719997	794574	765177	784855	692930	744384	662265	614551	569786	711541	604555	744989	662343	830837	612039	736703	653631	741708	661444	507530	583734	711522	727742	633483	694442	813622	632363
2437	gulonic acid*	Cofactors and Vitamins	Ascorbate and Aldarate Metabolism	46957	LC/MS Polar	100001586	2750	195.051	20246-53-1	9794176	7969943		HMDB03290	163550048	88553104	105372096	98230744	89534952	65787240	53374196	107922128	33252324	113266048	189034368	137759296	168887936	175103808	217950464	83181528	108510248	66874584	57635320	63468776	146738544	141712816	137997136	185122464	89640608	74930064	52590472	55878744	107539680	44649804	67892736	109009664	100382448	104822096	129462168	87034584
2472	heme	Cofactors and Vitamins	Hemoglobin and Porphyrin Metabolism	41754	LC/MS Pos	100001386	5003	616.176	14875-96-8	26945			HMDB03178	111014352	100535528	105378800	99449496	92261760	109370288	110021512	96699624	134626272	107352136	123132936	96551952	100660744	92958736	102559688	105005456	108084680	93863904	105481784	113769720	95207024	97278656	92341568	93188176	93821808	113803928	146471472	132771312	102337880	131625064	104146584	134654160	117887480	146251152	133806656	91695104
1104	hexadecanedioate	Lipid	Fatty Acid, Dicarboxylate	35678	LC/MS Neg	100001614	4615	285.207	505-54-4	10459	10027	C19615	HMDB00672	4446489	3697396	4324262	5012284	4112401	3361328	4837431	5759047	5553580	4946350	11001192	4211737	5543107	4357515	4042564	2053772	4063065	4310076	1595810	3399951	7424869	5994809	5994383	4070092	5573241	4366089	4022062	3713603	5227302	4308507	6489564	13290344	8309045	8236083	10519544	7557999
1186	hexanoylcarnitine	Lipid	Fatty Acid Metabolism(Acyl Carnitine)	32328	LC/MS Pos	100000781	3194	260.186	6920-35-0	6426853	4932273		HMDB00705	4252751	4538246	5941731	11490638	4326653	6279438	3553448	2514303	1929302	3930385	4755645	15056413	7263013	8074520	11793630	2653233	3895858	10415927	8095679	2216644	2706993	3193053	8205681	15689837	16741139	1029733	1248173	1304703	1692963	1004080	6355599	6876136	4755645	4884406	3156345	1965549
1175	hexanoylglycine	Lipid	Fatty Acid Metabolism(Acyl Glycine)	35436	LC/MS Neg	100001527	2900	172.098	24003-67-6	99463	89859		HMDB00701	474895	428933	437808	461768	309684	321095	432575	291266	187443	256170	339660	1844875	808922	903711	949431	275388	177010	396274	237165	216371	343111	425080	816668	735845	1190280	258568	214423	266231	219903	138306	680038	672214	515196	361090	490197	30373
2501	hippurate	Xenobiotics	Benzoate Metabolism	15753	LC/MS Neg	100000014	2106.9	178.051	495-69-2	464	451	C01586	HMDB00714	219089504	142653392	180046896	148917920	140285152	115404208	78898600	103876408	86292728	83398104	197201136	142081648	132618176	163537584	146834848	49675560	109064208	92024432	128753592	101126600	126524136	107590920	145873008	149560560	121454464	86118264	98565480	96461832	120959808	81903960	103119056	134756288	88553688	127533208	199432832	87923280
51	histidine	Amino Acid	Histidine Metabolism	59	LC/MS Neg	355	755.9	154.062	5934-29-2	6274	752	C00135	HMDB00177	103143840	81238168	89094600	87789032	78245512	85109320	71686952	83749712	91572712	86948536	99041296	109819560	105804872	106072960	110452768	69620224	87763656	85700496	77986000	82735560	102232760	94035248	94373752	106078216	96486496	74691416	73465992	91242792	85250848	80073824	87001352	97489952	106269376	91701256	97929720	78613264
324	homoarginine	Amino Acid	Urea cycle; Arginine and Proline Metabolism	22137	LC/MS Pos	100000961	700	189.135	156-86-5	9085	8732	C01924	HMDB00670	5222640	5647387	4677098	4357860	3775500	3456530	3754798	4607522	3486112	3906653	4583262	3242356	4768323	3309034	2798143	4538939	4377185	2876078	4288158	3788412	3857278	4411535	4742905	4782107	4766606	3619883	4112523	4144674	3940788	4527531	3544458	3688126	4951629	3993171	3083119	3571490
325	homocitrulline	Amino Acid	Urea cycle; Arginine and Proline Metabolism	22138	LC/MS Pos	100000963	821.7	190.119	1190-49-4	65072	58582	C02427	HMDB00679	5652208	5942218	7360233	7024236	7843591	5737637	5282379	5925689	6139618	6043978	8111133	6169358	6380766	4974269	5341393	4514874	7983573	5080609	5732510	5070976	7393941	8639226	6703349	5443956	6602187	4311502	4642769	5589714	5206125	5709085	6162995	6042387	5624618	6089611	9736962	4105289
293	homocysteine	Amino Acid	Methionine, Cysteine, SAM and Taurine Metabolism	15128	GC/MS	311	1648.2	128	454-29-5	778	757	C00155	HMDB00742	96008	118294	105437		73669	102591	124501	78836	109851	134828	128574	115610	104900	58985	172813	58624	91626	71811	114817	69992	113288		73867	93682			83699	84587	74726	113848	74744		103849		101320
18	homoserine	Amino Acid	Glycine, Serine and Threonine Metabolism	23642	GC/MS	100000458	1471	218.1	672-15-1	12647	12126	C00263	HMDB00719	65392	113831	93316	57838	76433	100050	53516	53012	76092	43760	68649	131048	116985	59902	85698	56564	63464	50775	65476	57313	105939	88628	110708	97759	56344	53271	56584	74130	50646	74597	76653	65174	76237	86738	64316	60343
2791	homostachydrine*	Xenobiotics	Food Component/Plant	33009	LC/MS Pos	100001550	1211	158.118	1195-94-4	441447	390180	C08283	HMDB33433	15419082	13016806	13454064	13487382	15962125	21928856	20728548	20265194	17836750	22235236	15327029	18208064	15963202	15987944	18524118	22246128	27098828	28929378	20916130	21366352	13520564	14059366	25647474	17950312	16195768	22802090	23006850	23061402	21964722	16188579	16019017	13894364	13907051	17692730	14326140	22195462
147	homovanillate sulfate	Amino Acid	Phenylalanine and Tyrosine Metabolism	38349	LC/MS Neg	100002250	1047	261.007	38339-06-9	29981063	21896746		HMDB11719	110512	121323	145927	139660	135230	119638	93126	80751	95589	99043	142766	203008	154681	198190	118704	55624	90890	127021	91936	114366	91332	125169	144351	137293	121202	106378	119283	101226	110808	77307	119614	127466	106154	96577	143161	77615
3070	hydroquinone sulfate	Xenobiotics	Drug	35322	LC/MS Neg	100001604	1395	188.986	123-31-9	161220	141624	C00530	HMDB02434	981323	830538	948299	996609	1055253	1070351	925188	945195	1101939	1106797	1178732	718697	642802	806954	802098	457912	1082547	943793	1590889	839724	566775	465247	663316	1048312	808063	850237	890302	753330	1072625	372868	483933	1091790	548750	754084	1172762	518124
1184	hydroxybutyrylcarnitine*	Lipid	Fatty Acid Metabolism(Acyl Carnitine)	43264	LC/MS Pos	100003926	1477	248.149		53481617			HMDB13127	5764366	5380932	6992498	9659685	5914005	5374853	10000234	7186569	2092557	5913956	6931854	6841533	6838048	5091271	6465125	8538045	5922574	7274764	5085500	4271909	8210681	5051168	10436985	7466132	6396167	6780051	6146747	7671112	6626632	3781740	4888382	8333159	5997316	6871268	8015789	6443280
1783	hyocholate	Lipid	Secondary Bile Acid Metabolism	34093	LC/MS Neg	100001279	5046	407.28	547-75-1	92805	21403098	C17649	HMDB00760	82303	340814	272084	367532	166045	74031	164949	30986	546022	184805	895971	92873	68315	189973	481755		386984	545584	138712	67998	289012	378780	170099	249040	228086	244566	46389	12706	970007	943004	121437	1070269	747873	994681	144443	446480
310	hypotaurine	Amino Acid	Methionine, Cysteine, SAM and Taurine Metabolism	590	LC/MS Pos	358	690	110.027	300-84-5	107812	96959	C00519	HMDB00965		121152				126540	93194		160854	148943						100358	130608		371400	90347	85656					83341			179916							380511
2262	hypoxanthine	Nucleotide	Purine Metabolism, (Hypo)Xanthine/Inosine containing	3127	LC/MS Neg	171	1291.2	135.031	68-94-0	790	768	C00262	HMDB00157	322705	481972	239942	390739	279654	237576	204432	202899	211037	290205	297767	319514	363712	289450	94654	199614	212333	225044	217040	233214	529945	400654	447664	684461	358060	469999	321816	321114	610899	516580	606127	415254	357587	195249	361942	443195
61	imidazole propionate	Amino Acid	Histidine Metabolism	40730	LC/MS Pos	100003434	1020	141.066	1074-59-5	70630	63798		HMDB02271	6588523	8425771	8392451	11756079	10509094	15987633	19807338	11499061	19047534	13920348	10073822	15570658	13914088	11117652	13103014	6273019	12348161	12038416	11650710	15521064	5787499	9013300	6578143	8234184	13086294	14097146	10512442	9362929	37457140	15948732	4960377	13663020	6535133	11439248	14896841	12741850
3303	iminodiacetate (IDA)	Xenobiotics	Chemical	21025	GC/MS	100000900	1538.8	232	142-73-4	8897	8557	C19911	HMDB11753	2098077	1673300	1708740	2159413	1933985	2038808	1580694	2039267	2562606	2216359	1909024	2388131	3013612	2700328	4174479	1785706	2542958	1836385	2054073	2406121	1620815	1735178	2949147	1962395	2354242	1864405	1831825	2387488	1474574	2458564	1407750	1810865	2383776	2063929	1997600	1458685
229	indole-3-carboxylic acid	Amino Acid	Tryptophan Metabolism	38116	LC/MS Neg	100002185	1708.8	160.04	771-50-6	69867		C19837	HMDB03320	100237	100193	96532	89949	102093	89083	144961	92262	157173	132307	116112	72675	78642	90513	74247	96086	159965	117955	151174	110054	102813	91568	97223	80382	93814	94830	124613	117072	155986	184486	65305	101121	90185	91858	126755	134308
194	indoleacetate	Amino Acid	Tryptophan Metabolism	27513	LC/MS Pos	100001034	3766.3	176.071	6505-45-9	802	780	C00954	HMDB00197	13580675	12000941	17554042	10388946	18502802	20539160	18475982	12639952	43051092	16654889	20926946	12546249	14588767	28018644	20832814	6590479	10035936	17890860	15887701	15155404	31569972	19845900	16033613	18007632	25842708	17830074	17541454	15951940	20728728	49690728	18562872	30707752	27110806	12924850	16795446	21944206
2794	indoleacrylate	Xenobiotics	Food Component/Plant	22114	LC/MS Neg	100000800	2511	186.056	1204-06-4	15030923	4524636		HMDB00734	21213838	23332146	28869628	19225620	29765378	27582592	8628816	21185012	14763194	12198205	38562792	20169300	24206656	35550520	32097340	8849999	18759810	12781516	18198280	13083758	26235310	29696304	25882736	28090914	16827336	23013822	17848308	27002616	16289066	26823012	21023296	16375361	18195808	14046259	30054236	25760020
220	indolebutyrate	Amino Acid	Tryptophan Metabolism	34402	LC/MS Pos	100001404	4425	204.102	133-32-4	8617	8298	C11284	HMDB02096	200211	251791	177697	88075	163323	150579	266788	57311	139566	98679	201645	50676	79446	118956	165968	94601	26927	33348		129898	284394	176200	53874	165739	131518	165125	75963	52630	160812	296859	193736	199365	254828	129469	178600	164126
193	indolelactate	Amino Acid	Tryptophan Metabolism	18349	LC/MS Pos	100000463	3514	206.081	832-97-3	92904	83867	C02043	HMDB00671	7675610	8485806	8080389	9322018	5385838	7927019	3252691	7319013	3509907	2692589	8774717	5824592	4833391	6511598	7578201	2471668	4268084	4190837	9288826	4299174	6298666	8564931	5984439	3437073	4891239	3395393	5022999	4076421	2656464	3467840	9341763	6872111	6794627	3537751	5422498	7195106
196	indolepropionate	Amino Acid	Tryptophan Metabolism	32405	LC/MS Pos	100001083	4147.9	190.086	830-96-6	3744	3613		HMDB02302	458973056	470956768	486380800	396075456	498322880	647679552	293466048	445250304	317520288	282302048	702249472	452536288	421695328	557348608	497795040	229500480	378008256	293068832	421935424	344337632	636175808	612481408	452600384	504345824	386531840	495922592	525693120	575746240	374189920	529565056	496919552	372263040	334192000	309382464	543960448	561251968
2795	indolin-2-one	Xenobiotics	Food Component/Plant	43374	LC/MS Pos	100004318	3386	134.06	59-48-3	321710	284794	C12312	HMDB61918	831338	1082931	1069822	1068653	1287529	856359	882754	1112518	1225276	817532	1439738	1135597	808528	1322134	1498509	557597	962453	1751015	2099944	808947	1050118	1142221	1633000	1152430	1148217	579195	879853	934845	505512	1137174	627260	1287797	1078429	1363801	1463927	867922
2261	inosine	Nucleotide	Purine Metabolism, (Hypo)Xanthine/Inosine containing	1123	LC/MS Neg	361	1602.1	267.073	58-63-9	6021	21241953	C00294	HMDB00195	3535011	2848086	4158415	3705046	5126323	4403023	5235660	5933211	4003230	4945577	5085669	5264691	6511048	4084980	4214952	4886554	5766694	3939229	11137897	3004671	7422547	5719832	11453767	5883961	6795416	4759338	4482549	7308025	5276969	5085669	6199092	4459401	5458052	4803479	7060057	3982687
2260	inosine 5'-monophosphate (IMP)	Nucleotide	Purine Metabolism, (Hypo)Xanthine/Inosine containing	2133	LC/MS Neg	362	650	347.04	4691-65-0	8582	5482599	C00130	HMDB00175	9987161	14344448	16867578	14962857	17443328	7076408	7567594	9871403	10200360	9816189	11101425	18897514	15110612	11760879	1937343	6236329	7886583	4933894	5937923	8641506	24683836	22278952	29134890	22430260	31058678	28378392	20289386	25475236	19449334	22963192	24058636	19221480	18159162	18168102	28313716	22132524
768	Isobar: fructose 1,6-diphosphate, glucose 1,6-diphosphate, myo-inositol 1,4 or 1,3-diphosphate	Carbohydrate	Glycolysis, Gluconeogenesis, and Pyruvate Metabolism	46896	LC/MS Neg	100002180	551	338.989					HMDB01058	33761756	34140868	39322052	18017334	27441452	16942820	16446056	11526501	11931234	11715368	36396804	29524260	29843084	17142978	381847	11860426	9818707	10100113	15820017	10709949	32792386	24428056	24927502	31956796	34769164	13158210	14698271	23910472	12164350	11368313	32916348	28329860	27606058	24582734	40176200	12032506
278	isobutyrylcarnitine	Amino Acid	Leucine, Isoleucine and Valine Metabolism	33441	LC/MS Pos	100001055	1955.1	232.154	25518-49-4	168379			HMDB00736	109982568	84262416	123327480	161595056	122216048	106071384	89381688	82833952	57664504	75010104	98240648	109499560	107145696	78700360	74429560	56896092	108117608	125135704	113144440	65354192	87265840	80909808	139727664	125865736	135061632	66378288	61432048	70794128	86457152	66839132	84107864	118113016	89658784	79838056	100188960	82385016
279	isobutyrylglycine	Amino Acid	Leucine, Isoleucine and Valine Metabolism	35437	LC/MS Pos	100001590	2009	146.081	15926-18-8	10855600	9030891		HMDB00730	2923018	1874193	2920250	1851622	2667667	1543970	2106748	2116951	1082761	1948472	2242386	3351432	3008086	3248703	1929696	1168686	1680933	1966476	1730330	925135	2070046	2268603	2557981	2391755	2674795	1198651	1212486	1296785	1885850	715981	1509823	2345408	1825634	1833519	2355702	639604
262	isoleucine	Amino Acid	Leucine, Isoleucine and Valine Metabolism	1125	LC/MS Pos	376	1599	132.102	73-32-5	6306	769	C00407	HMDB00172	2282165504	2369239552	2599943936	2372652032	2411783936	2026846720	1843212288	2235876096	1858015232	1962288384	2252641024	2596556288	2443572992	2351547648	2195973632	1353445248	2448944640	2051647616	2323004928	1929613952	2342180096	2277006592	2499943936	2268078080	2035469568	1992334080	1815227136	2084022656	2211272960	2168632832	2056964480	2272599296	1911694464	1948475136	2721755392	1938196864
532	isoleucylglycine	Peptide	Dipeptide	40008	LC/MS Pos	100003169	1740	189.123	868-28-0	342532	303621		HMDB28907	2066114	2135673	2061904	2255849	2185023	1824601	1747913	1781543	1810829	1806000	1815117	2260721	1652822	2181476	2197961	1442418	1834109	1546907	1798831	2001363	2011102	2287754	2112426	2289421	2019567	3001994	2421466	2620272	2345165	2654482	1990854	2188520	1885377	2217530	2088264	1995971
239	isovalerate	Amino Acid	Leucine, Isoleucine and Valine Metabolism	44656	LC/MS Neg	100000708	1564	101.061	503-74-2	10430	10001	C08262	HMDB00718	856141	806891	692090	763860	805994	876559	1010336	1010274	1461821	842856	1638922	1037019	1080589	1619120	1835409	669543	1160065	1399353	886148	846986	1050621	873747	1051055	2014003	1409580	370386	963992	951979	1012464	1282106	1158603	1204280	1198338	805957	898303	1889388
241	isovalerylcarnitine	Amino Acid	Leucine, Isoleucine and Valine Metabolism	34407	LC/MS Pos	100001393	2504.9	246.17	31023-24-2	6426851	4932271		HMDB00688	10548258	8313943	13820554	15259624	12097323	12084969	7161501	9507348	11235639	11575632	9494211	10023679	9852390	11286642	9854437	7562985	10735729	14101021	13207546	7816737	9694080	6954412	11575846	14412426	13371184	7112718	8714659	8946725	11619486	11845240	9152173	10030220	10894146	8917742	9055230	7848417
240	isovalerylglycine	Amino Acid	Leucine, Isoleucine and Valine Metabolism	35107	LC/MS Neg	100001452	1950	158.082	16284-60-9	546304	475516		HMDB00678	2629292	2399016	2533569	2571192	1898636	1524431	1751058	1495479	814731	1273152	1911735	3611657	2730135	2131156	1504333	865887	1342749	1601099	1718771	1294647	1407680	1989404	1964503	1900505	2876128	946848	1539223	1229624	1940933	970754	1942325	2259825	1845996	1443435	2518119	917569
200	kynurenate	Amino Acid	Tryptophan Metabolism	1417	LC/MS Neg	98	2224	188.035	492-27-3	3845	3712	C01717	HMDB00715	3472719	2377349	2578853	3310703	3119664	1810144	1588120	1303713	1069716	2191442	2643016	3333003	2864455	3238573	2604023	1420037	2130262	1986157	1386152	1246170	2188631	2466807	2519502	2900999	2270779	1657102	884012	1319801	1372706	1112029	1878042	1889706	2011532	2247000	2192813	1126128
199	kynurenine	Amino Acid	Tryptophan Metabolism	15140	LC/MS Pos	100000265	1902.1	209.092	2922-83-0	161166	141580	C00328	HMDB00684	47579588	47024188	41667252	52436380	39312324	23904478	29630216	21789162	27523364	26684270	38748988	54339544	46830260	42743920	43785012	23518518	24531110	26059702	22429950	25949660	46954900	49189412	43283592	42447640	45347660	26106310	26262962	29456364	25676582	29837306	40362924	46145808	43257408	54464124	44709792	23908264
778	lactate	Carbohydrate	Glycolysis, Gluconeogenesis, and Pyruvate Metabolism	527	LC/MS Neg	482	681.6	89.0244	79-33-4	612	592	C00186	HMDB00190	1105705984	1441233792	1323179520	1256225152	1294426752	1107884416	1038821184	958981696	715539968	968899328	1153508608	1386771072	1322297344	1294023552	1107950976	758633664	1118990592	1157045760	1061428544	956430208	1095840640	1143561472	1317444608	1095836928	1217631872	1009891264	876903232	828783488	1100687488	779643008	875044032	917213184	896605888	979096512	1042204288	756060480
1587	lathosterol	Lipid	Sterol	39864	GC/MS	100001105	2337	255.2	80-99-9;80-99-9	65728	59151	C01189	HMDB01170	176006	105510	244449	170679	127756		111216	173302	122069	133865	222834	194141	290553	127957	183676		116489	129641		167768		217703	293150	178380	186432	152605		161970	194448	175108		141119	252599	117695	193904	82406
1192	laurylcarnitine	Lipid	Fatty Acid Metabolism(Acyl Carnitine)	34534	LC/MS Pos	100001392	5070	344.28	25518-54-1	10427569	8602997		HMDB02250	1090251	603307	649079	847951	877694	632038	771749	577571	637340	673684	1282071	901697	881761	1048727	1204580	736966	384453	391840	496760	481445	1265240	765475	1328480	990721	1135105	284740	399947	367475	427422	558924	928098	1251357	1202913	1350272	1126757	814453
233	leucine	Amino Acid	Leucine, Isoleucine and Valine Metabolism	60	LC/MS Pos	397	1680.2	132.102	61-90-5	6106	5880	C00123	HMDB00687	3387509760	3557234688	3877595136	3540141056	3708336896	3204718080	2729986816	3530984448	2709461504	2937067008	3442824704	3802859776	3432201216	3464912640	3063508736	2121829376	3476338176	3069946112	3597591552	3036653056	3570390016	3521247744	3794197760	3491389952	3171212032	3018874112	2844113920	3284807168	3495267328	3131486208	3210628096	3311439616	2928760832	2989947136	3753138688	2866978816
550	leucylglycine	Peptide	Dipeptide	40045	LC/MS Pos	100003185	1805	189.123	686-50-0	79070	71402		HMDB28929	204106	265672	274171	259779	269150	267813	214892	185449	203968	205794	226360	306615	305193	282617	303777	115393	171360	197539	222516	198916	183509	206240	143435	200765	198113	198922	179360	184636	197011	193609	172738	153434	142245	146142	221186	110505
1019	linoleate (18:2n6)	Lipid	Polyunsaturated Fatty Acid (n3 and n6)	1105	LC/MS Neg	180	5535	279.233	60-33-3	5280450	4444105	C01595	HMDB00673	5311471104	3440736256	2320901632	4988504576	3648071680	4073210624	2293299712	2529844736	4274316544	2431930624	3789914624	5384117760	4446010368	3906586112	6077990400	2439502592	2305777664	2497951232	2876373248	3646821888	4089507840	4290416640	5063348224	3289869312	4566003200	3363542016	3695951872	3753737472	2064450944	2159118592	2897817600	4491108864	3479610624	4775829504	3473152512	2949991168
1021	linolenate [alpha or gamma; (18:3n3 or 6)]	Lipid	Polyunsaturated Fatty Acid (n3 and n6)	34035	LC/MS Neg	100001337	5450	277.217		5280934	4444437	C06427	HMDB01388	397194016	253620352	160873344	402131712	291245792	277139392	178976720	191020096	424301536	195774864	322698624	388114944	402776352	243109184	450252512	191027184	184174752	172921920	221207760	286261248	391070624	383812352	418066720	239976528	345745248	276646976	304202208	397835936	161554368	171672256	232595424	434191616	309385664	430811200	376677632	210377072
1198	linoleoylcarnitine*	Lipid	Fatty Acid Metabolism(Acyl Carnitine)	46223	LC/MS Pos	100003151	5190	424.342	36816-10-1	6450015	4952667		HMDB06469	570778	2832163	1450974	618260	1413316	6396205	7177284	4951751	7109053	7189675	3009054	615533	532504	343151	2385629	4650828	4789703	6605858	4132543	5586871	3367527	1758810	631042	3897685	247022	5423660	6454410	4639617	6250520	6703410	2073381	1848736	739445	345690	3791689	4752670
1768	lithocholate	Lipid	Secondary Bile Acid Metabolism	1483	LC/MS Neg	405	5372	375.29	434-13-9	9903	9519	C03990	HMDB00761	396283	228928							1119485	195149	223524	186759			200942		257157	341897	154080	198046	645043	844883	105345	159315	160599		164251		687730	1750766		399778		285877	98995	292855
71	lysine	Amino Acid	Lysine Metabolism	1301	LC/MS Polar	407	5431.1	145.098	56-87-1	5962	5747	C00047	HMDB00182	52726964	59777748	66024980	47508668	58100568	60446824	52457276	68860792	61941956	69167280	54194600	42222408	49011232	36746260	32157008	50989296	62763008	62099024	45625376	51487912	60435460	62279956	47149996	57530732	43593940	55836720	63817256	70474200	73512816	81423568	44086748	17865892	58526544	51971876	59708816	64600284
953	malate	Energy	TCA Cycle	1303	LC/MS Neg	409	615.6	133.014	6915-15-7	525	510	C00149	HMDB00156	406228704	428523392	585090624	426502816	477276032	307747424	320929600	380544320	219194768	295602464	535945472	470530880	569980160	334636544	273041984	226447968	269606912	291755072	243623808	283600960	545559488	553404864	611488448	563193088	484281312	388629856	277304672	352742144	468832096	292728288	505945664	368956768	456702080	421849632	629608768	284402880
1152	malonylcarnitine	Lipid	Fatty Acid Synthesis	37059	LC/MS Pos	100001526	965	248.113	853728-01-5	22833583	21403153		HMDB02095	2457465	1621972	2040342	1447366	1112150	1947233	2322683	1600114	1037780	1379550	1150962	1514460	1024058	929381	781464	1194589	1190581	1028669	2457329	1574494	1691120	1065142	1340297	1490277	1468193	1437276	1923621	2468656	1715932	1432549	1146555	1214314	1118914	1045273	758849	1392792
829	maltose	Carbohydrate	Glycogen Metabolism	15806	GC/MS	913	2142.1	204.1	6363-53-7	10991489	388469	C00208	HMDB00163	357422	577821	11486487	644644	567412	1629938	1952269	1394064	682324	1057036	1158842	484808	1227369	546520	202160	498070	1069110	721339	664512	592568	524706	365252	873360	690718		442195	557740	477241	602794	921618	669606	370295	571709	371868	2216498	135176
870	mannitol/sorbitol	Carbohydrate	Fructose, Mannose and Galactose Metabolism	46142	LC/MS Polar	100001740	2260	181.072		5780	440	C01507	HMDB00247	12497016	16850290	18323032	17089472	17157088	18391570	16324227	16563199	13628365	15760802	17969584	15100490	13032913	12179425	11914861	11356663	12635258	16627484	13301964	16227603	16907522	12788141	21008298	15669465	16566029	15399352	14572560	15353969	14376623	14483160	15601106	13202877	14848413	12886541	12141248	13073983
871	mannose	Carbohydrate	Fructose, Mannose and Galactose Metabolism	48153	LC/MS Polar	803	2200	225.062	3458-28-4	18950	141983	C00159	HMDB00169	15862757	23046064	21273358	21093122	22218164	24070502	24486540	19485804	18088044	16876770	19033276	21636782	15489842	16151760	15262998	18433836	17306334	22425792	23233202	18678116	19390648	16300363	24701736	17181774	19945096	28738630	22864454	22456986	15748521	20717710	23928460	19674504	19152152	17354712	21145666	19950494
983	margarate (17:0)	Lipid	Long Chain Fatty Acid	1121	LC/MS Neg	891	5731	269.249	506-12-7	10465	10033		HMDB02259	130786352	79202344	74882712	97515632	102159480	59671776	51409608	65011292	96174016	60352476	96983760	105165304	119410168	123729208	131861096	52476028	61211644	50760452	82049568	57085604	115378456	118646520	140280128	83595920	138296912	76256344	80640464	97402688	60056696	74246056	76018280	127087840	102854456	114987984	115956592	71283088
1030	mead acid (20:3n9)	Lipid	Polyunsaturated Fatty Acid (n3 and n6)	35174	LC/MS Neg	100001472	5650	305.249	20590-32-3	5312531	4471956		HMDB10378	100265600	51928104	44430328	73166592	83481584	53998572	32495238	57043832	84916384	29091990	90118776	118317656	104854552	75501792	87498032	37115788	43011272	49842752	66514156	63477704	122280456	83603432	197130848	57481400	94918568	57778760	83155528	65592044	54334752	79555408	78400168	118558352	91133728	80404304	121755264	64000540
284	methionine	Amino Acid	Methionine, Cysteine, SAM and Taurine Metabolism	1302	LC/MS Pos	415	1250	150.058	63-68-3	6137	5907	C00073	HMDB00696	435764160	454113760	424517152	475766528	419313632	441786976	411186944	440602528	530942944	480056768	510640704	485808992	486712192	431269600	423659296	328213344	504508704	438424320	455132704	432553568	531108960	490839648	418086176	480857184	448421920	399729568	409425504	460651360	497395232	530359680	395716000	457663552	397415264	461033888	471287840	369590784
289	methionine sulfoxide	Amino Acid	Methionine, Cysteine, SAM and Taurine Metabolism	18374	LC/MS Pos	100000039	741.1	166.053	3226-65-1	158980	139840	C02989	HMDB02005	8770780	9871447	8700776	8952222	7039043	8515308	8110482	8003171	9557416	8502721	6429422	8537084	8390430	7149929	8003849	6321042	6304774	8245684	6279029	7674437	7003640	6880558	7564046	8685899	8183523	7012640	7637044	9247556	7413742	8259631	8190044	11637585	7453590	7688567	8287625	6464827
2896	methyl glucopyranoside (alpha + beta)	Xenobiotics	Food Component/Plant	46144	LC/MS Pos	100005864	1090	212.113					HMDB29965	5106171	7031907	4101280	4044635	3487586	5368560	3464777	2982422	3239336	5430735	9193726	4043692	7514444	6929847	3930286	2196960	2619319	2592256	2575555	3133920	5693866	4685044	6656555	3577174	4141487	3752982	2789454	2574849	2939465	2924788	5393325	3276163	4216256	3581417	3540650	3009432
2817	methyl indole-3-acetate	Xenobiotics	Food Component/Plant	1584	LC/MS Pos	1104	4350	190.086	1912-33-0	74706	67279		HMDB29738	575891	624517	570927	597977	598430	564535	540294	406346	574151	562064	547190	599117	562670	618140	395403	353908	210714	529084	576326	584689	658393	419886	576986	568696	562731	468238	314459	199196	498872	559533	493952	982557	520553	318206	691522	336067
2560	methyl-4-hydroxybenzoate sulfate	Xenobiotics	Benzoate Metabolism	48429	LC/MS Neg	100006116	2873	230.997						37693	23734	70031	98754	55840		16127		21489		62624	159756	85050	173309	169630				40143	15818	60499	47791	55852	53802	82965						61594	57673	66305	70374	122726
2394	methylphosphate	Nucleotide	Purine and Pyrimidine Metabolism	37070	LC/MS Neg	100001805	605	110.985	7023-27-0	13130	12578		HMDB61711	408718	802930	388202	379876	628988	744997	718651	1174564	562842	771782	57830	428325	167223			961023	836648	575970	540175	770103	924758	295548	358097	618197	322807	361856	520516	679931	1205750	780785	683223	400141	456820	257114	632906	760520
254	methylsuccinate	Amino Acid	Leucine, Isoleucine and Valine Metabolism	15745	LC/MS Polar	2051	2800	131.035	498-21-5	10349	9922		HMDB01844	101938824	73379664	95903048	128618400	129950064	121708736	102072400	94667096	42353484	132791104	92832168	120742160	82258472	73920968	84054744	46865656	127936336	166227648	80279728	105895544	59685204	91590208	110125640	105437616	126235216	90899288	76432240	76767944	91292352	35410752	53325344	88012064	50443776	39994972	98012448	56022784
1579	mevalonate	Lipid	Mevalonate Metabolism	39583	LC/MS Neg	30	818	147.066	96949-03-0	439230	388367	C02104	HMDB00227	626634	670123	723645	614327	626634	763128	521354	567311	607589	650101	845746	621659	679139	758130	994190	376468	523753	455557	615146	490981	666643	520512	587379	544832	603646	157452	425586	517762	520233	426987	559217	583212	616612	599329	765528	586928
1584	mevalonolactone	Lipid	Mevalonate Metabolism	48118	LC/MS Pos	100000772	1731	131.07	674-26-0	10428	9999		HMDB06024	1359033	1376932	1332387	1278276	1098833	1193662	1463327	1665309	1281469	1259139	1921732	1563655	1203910	1225804	1665309	1629272	1301966	866315	2425538	1272359	2382873	1332700	1211379	1298486	1720447	1152552	887185	1324191	1043313	1161979	1653594	1630388	1683351	1391074	2060438	1613459
1344	myo-inositol	Lipid	Inositol Metabolism	19934	GC/MS	363	1924.9	217	87-89-8	892	10239179	C00137	HMDB00211	13917260	15705733	13078001	13944436	11814603	14904312	12852826	11266827	12470804	12538726	14728081	15181632	15442525	9060348	12218148	8840758	11816924	10829697	9763665	12923293	14204253	14713205	14941445	14565853	11882415	12701572	11930004	13762756	9569356	9847318	11337429	9382342	13541204	11930289	14537463	8391117
977	myristate (14:0)	Lipid	Long Chain Fatty Acid	1365	LC/MS Neg	519	5440	227.202	544-63-8	11005	10539	C06424	HMDB00806	329264832	171859728	162750000	352339424	254202752	154621808	189334560	163909264	268706144	131938776	311502368	365474560	398831712	342093984	333537984	178758608	145296736	131273128	201228048	154840976	251293888	342251744	305417024	183456784	371734304	154877184	193115136	228648816	128276408	177596784	200491536	396442816	335882624	451919264	353271136	187085504
978	myristoleate (14:1n5)	Lipid	Long Chain Fatty Acid	32418	LC/MS Neg	100001198	5346.9	225.186	544-64-9	5281119	4444564	C08322	HMDB02000	37780508	13991131	14876560	30290032	21989396	17067892	27944986	24718748	44837092	19827834	43012592	27237112	36988312	30134640	33941252	32234368	11696879	11446160	21989396	20845438	29231006	33498622	26933084	15395180	26547192	21977828	24437422	36745000	16151536	26698288	33138206	48777884	52653368	50594928	45320184	26051498
1200	myristoleoylcarnitine*	Lipid	Fatty Acid Metabolism(Acyl Carnitine)	48182	LC/MS Pos	100006051	5120	370.295	889848-55-9					935191	778276	1071791	906113	1091562	1770243	1712252	1793831	292755	1757441	2262855	574946	1094842	968977	717195	1539038	1389637	1096754	1083300	1213378	1742940	935713	1589033	1174967	682923	1185773	1887036	987773	1192619	2034018	1284486	2169711	2076513	1790309	2357691	1732493
1193	myristoylcarnitine	Lipid	Fatty Acid Metabolism(Acyl Carnitine)	33952	LC/MS Pos	100001270	5142.1	372.311	18822-89-4	53477791	4932274		HMDB05066	3395099	2779800	3829987	3737764	3729461	2386598	3915164	3050550	3113218	2903095	5137634	3381939	3301257	3344562	3134546	2674164	2133352	2990441	2212498	2441715	5032670	3190700	3743981	4206259	3416325	3624445	3123503	2996389	3862048	4306700	3840779	5418695	4658260	4378443	5582192	3608226
2820	N-(2-furoyl)glycine	Xenobiotics	Food Component/Plant	31536	LC/MS Pos	100001086	2099.5	170.045	5657-19-2;5657-19-2	21863	20549		HMDB00439	362861	547709	518305	601572	381929	195775	96160	109221	111432	212634	255357	544516	317417	307291	234634	51506	161373	245167	251326	244131	84855	352940	248750	261851	368343	85294	156671	152706	200028	30065	140103	302065	181151	201869	243806	25479
74	N-6-trimethyllysine	Amino Acid	Lysine Metabolism	1498	LC/MS Pos	189	690	189.16	23284-33-5	440120	140379	C03793	HMDB01325	166412480	177529008	128561264	158927136	123619408	186993728	177045008	181655152	177488144	171093824	158615280	124643576	131318616	101965384	117977360	179648000	177771168	201985648	137872976	161363152	159932672	124980560	128541344	161173664	168305296	166643584	168704960	172426448	164981904	166643584	155707792	113245984	160890176	101379768	153437616	158062896
56	N-acetyl-1-methylhistidine*	Amino Acid	Histidine Metabolism	43255	LC/MS Pos	100004299	987	212.103						1171007	1359954	1343239	1588870	1654552	1546339	2719502	1671120	1493338	1375588	1653689	1205818	1402370	1161297	776597	1138813	1513027	1614520	1074865	1933053	1122566	1292915	1344942	1362896	1152384	1880581	1495249	1639352	2423824	1512733	1179550	2199873	1152411	1048534	3025264	1079067
55	N-acetyl-3-methylhistidine*	Amino Acid	Histidine Metabolism	43256	LC/MS Pos	100002204	917	212.103	37841-04-6	193270	19993498			343481	465619	508992	456909	155070	720666	1001307	810545	432802	549337	423833	114878	569276	387559	227998	406673	609094	600752	461917	478445	354417	256009	413387	410669	212344	503435	443779	615296	847461	723894	133060	476732	287113	447200	1033572	450740
40	N-acetyl-aspartyl-glutamate (NAAG)	Amino Acid	Glutamate Metabolism	35665	LC/MS Pos	100001612	1575.4	305.098	3106-85-2	5255	5065	C12270	HMDB01067	248849	199589	206116	231355	174537	131064	183392	75374	179344	133032	259583	279415	318461	295267	291420	167402	161309	109101	175550	121264	254769	274286	319834	213158	204659	69716	123051	92921	146915	202468	209008	209761	247662	246324	248765	121260
2366	N-acetyl-beta-alanine	Nucleotide	Pyrimidine Metabolism, Uracil containing	37432	LC/MS Pos	100002102	1471	132.066	3025-95-4	76406	68881	C01073	HMDB61880	12180096	12026785	11716840	11888336	13439716	9267228	10156867	10222287	8190433	10376214	12601485	13152107	11879310	11799427	10740963	9313526	9858850	9031051	9310825	8382077	13214999	12706235	12521012	11058148	12953518	7503411	7604675	7428026	9219948	8631509	11988356	12901385	12039525	12244296	12987158	7447652
25	N-acetylalanine	Amino Acid	Alanine and Aspartate Metabolism	1585	LC/MS Neg	1110	861.2	130.051	97-69-8	88064	79449	C02847	HMDB00766	1583230	1785190	1638455	1323434	1468698	1205507	1324008	987817	891636	1267917	1564126	1751063	2065416	1916710	1674687	1257027	1334941	966552	1081019	925996	1449112	1571534	1440044	1790020	1873030	1002739	1255619	1247582	1320588	1105610	1421209	1165286	1539454	1363451	2030936	1184984
330	N-acetylarginine	Amino Acid	Urea cycle; Arginine and Proline Metabolism	33953	LC/MS Pos	100001266	1116	217.13	155-84-0	67427	60752	C02562	HMDB04620	7432475	7329123	8746851	8266714	7978713	5727300	3344220	5338517	3212005	5884913	7156747	7539141	6485552	5940894	5019148	4179111	8102034	7934339	6531031	5245415	7731790	7033159	7317998	8074878	6091095	4399522	4455733	5332343	5539151	3837338	5816507	5404358	5013480	7379625	7463694	3322815
31	N-acetylaspartate (NAA)	Amino Acid	Alanine and Aspartate Metabolism	22185	LC/MS Polar	100000787	3143	174.041	997-55-7;997-55-7	65065	58576	C01042	HMDB00812	14948586	20908688	22365936	33071546	22980708	30551428	33870240	28164482	15600321	19722704	21611658	29897218	27073068	15765235	17930538	19215670	17675070	39964192	23388334	29059516	18190328	20791142	31473768	21478672	27978892	27980302	28823710	22740930	20176338	23671726	22690052	26528320	27886852	21279416	34031292	17308884
403	N-acetylcarnosine	Peptide	Dipeptide Derivative	43488	LC/MS Neg	100004046	1235	267.11	56353-15-2	9903482	8079136		HMDB12881	219206	214621	207782	209678	199771	255215	348493	260211	294099	265040	267763	210547	228574	164633	162139	255953	173878	205200	217549	207743	258831	151532	186854	197275	205078	210824	237487	285087	197969	245515	207271	204584	244089	211175	274007	208578
345	N-acetylcitrulline	Amino Acid	Urea cycle; Arginine and Proline Metabolism	48434	LC/MS Neg	100001577	940	216.099	33965-42-3	656979	571213	C15532	HMDB00856	3499665	2616266	3287509	2673932	2046186	2337199	1153473	1768756	839127	1951006	2046283	2583744	2480160	1692220	1345152	1292995	2604332	2687475	2585396	1692647	1607146	1839037	1722066	3394530	2300492	1180088	1519199	1880492	2309974	1167592	1929532	1527595	1349363	1378831	2212380	1177150
302	N-acetylcysteine	Amino Acid	Methionine, Cysteine, SAM and Taurine Metabolism	1586	LC/MS Pos	1107	1792	164.038	616-91-1	12035	11540	C06809	HMDB01890	467305	813831	1187463	624592	710446	493692	739259	714986	506320	632680	682971	584071	487915	472706	402788	491085	815458	941403	673690	630386	871062	567919	538749	631591	452023	535448	476436	491895	1027318	596994	418234	589552	500444	596826	641688	685940
916	N-acetylglucosamine	Carbohydrate	Aminosugar Metabolism	15095	GC/MS	100000281	1903.3	245	7512-17-6	24139	22563	C00140	HMDB00215	48759	42836	81940	50560	26222	19867	42919				51200	61038	93581	51571	64125	47230	46914	43182	35803		55073		62596	74848	68874	44334	63809	44498	39020	38115	55067	68000	58011	64829	80081	24348
38	N-acetylglutamate	Amino Acid	Glutamate Metabolism	15720	LC/MS Pos	100000282	1492	190.071	5817-08-03	70914	1266066	C00624	HMDB01138	800917	1279984	1353637	1434838	859532	692667	561489	499846	137963	417294	1196038	1835029	1645144	1723562	1710243	421536	675076	835896	447174	583488	1473053	881253	1298807	1600568	1935929	297947	214462	529991	1065210	309846	1051457	910941	676960	790111	1535999	385177
39	N-acetylglutamine	Amino Acid	Glutamate Metabolism	33943	LC/MS Pos	100001253	1193	189.087	2490-97-3	182230	158492	C02716	HMDB06029	11291382	15830318	20825298	12518792	14185276	10072467	9410001	9834339	4643353	8361036	12629032	17574198	14683696	16358953	10663856	6960718	10143770	12562163	7508686	9639415	9899683	13693328	19373394	13431988	16153220	8424709	9845297	11888443	13883543	7679978	10183716	10313248	9117351	7756738	15487509	8036445
2	N-acetylglycine	Amino Acid	Glycine, Serine and Threonine Metabolism	27710	LC/MS Pos	100001006	1108	118.05	543-24-8	10972	10507		HMDB00532	4308303	4986536	5465117	5015116	4101575	4254392	11393381	7496473	3314879	3444192	3810319	4528161	4267395	3632324	3188485	11357790	4057395	5117327	3582398	4519827	5962691	4889712	3088489	3976483	4345734	5705172	5889516	6718766	5387323	4949154	4938124	5244349	5135195	5120696	8422805	6172837
70	N-acetylhistamine	Amino Acid	Histidine Metabolism	48679	LC/MS Pos	100006123	1000	154.097	673-49-4	69602	62805	C05135	HMDB13253	1137284	1430187	1595037	1486858	1366120	1040270	889429	977220	914093	1018254	1249875	1258601	1314116	1399518	1605825	769926	1017253	1074466	950666	1021220	1267515	1650868	1545039	1447214	1266723	1484772	896595	986586	1197948	819379	1159009	1490141	1190131	1085898	2108045	785203
52	N-acetylhistidine	Amino Acid	Histidine Metabolism	33946	LC/MS Neg	100001293	900	196.073	39145-52-3	75619	68142	C02997	HMDB32055	854842	778006	911261	775718	792485	601248	548657	571685	284458	534884	697447	1024274	926149	901180	551255	397217	658046	580297	546537	546780	643965	791847	851748	801408	825832	538514	492415	611346	735249	392456	585928	691974	598419	577874	1021676	427219
264	N-acetylisoleucine	Amino Acid	Leucine, Isoleucine and Valine Metabolism	33967	LC/MS Neg	100001276	2275	172.098	3077-46-1	2802421	2081100		HMDB61684	1996955	2059487	2634743	1469716	1823266	1293205	995024	1259733	630875	1094464	1623200	2031177	2042608	2350649	1457760	804993	1484683	1457429	1577557	992263	1308429	1390419	2066326	1665747	1618776	926995	1001801	1262240	1549668	1056475	1479803	1160853	1404653	1169891	2007580	1087934
231	N-acetylkynurenine (2)	Amino Acid	Tryptophan Metabolism	48757	LC/MS Pos	100006378	3114	251.103						20216102	30008388	33531282	27304102	30452398	8396069	12823645	14563866	13163225	9956700	26074418	31636918	36282644	30375296	25677446	7704044	10591392	16869762	7737530	8439727	23441562	32251144	29910480	23209926	27583112	6939653	6895678	7704044	12511762	15004492	18878842	29020152	32924988	37529680	32853742	7729074
234	N-acetylleucine	Amino Acid	Leucine, Isoleucine and Valine Metabolism	1587	LC/MS Neg	1082	2361.4	172.098	1188-21-2	70912	64075	C02710	HMDB11756	2533039	3096918	3495757	1884365	2234578	2215709	1697902	1835222	694901	1583858	1835222	2368245	2959375	2799122	1135557	1308816	2764501	2313749	2257396	1385687	1474706	1783314	2125989	2214223	2386276	1278205	1419870	1902219	2947680	1252979	1848824	1554785	1415267	1441613	2814081	1723877
285	N-acetylmethionine	Amino Acid	Methionine, Cysteine, SAM and Taurine Metabolism	1589	LC/MS Pos	1083	2587	192.069	65-82-7	448580	395338	C02712	HMDB11745	1434003	1758118	1913765	1429945	1699472	1894830	1807007	1609020	1232516	1225033	1705247	1710967	2322216	2071590	1209201	1468368	2122179	1804486	1356516	1170188	1428215	1301275	1442682	2254172	2552775	969690	1159619	2288632	2854700	1351394	1691957	1623784	1438447	1413200	3108456	1546074
924	N-acetylneuraminate	Carbohydrate	Aminosugar Metabolism	32377	LC/MS Polar	1162	3072.6	308.099	131-48-6	439197	10292217	C00270	HMDB00230	1713087	1866238	2225870	2028555	1837558	1277323	1438113	1484122	1154508	1223221	1957698	1850923	2014365	1723582	1590214	1034062	1146550	1441470	1152630	1534855	2239874	2557200	1873189	2407120	1870144	3036100	1970097	2368660	2710801	2486343	2040826	1878928	2276078	2096982	2582212	2242517
97	N-acetylphenylalanine	Amino Acid	Phenylalanine and Tyrosine Metabolism	33950	LC/MS Pos	100001256	3554	208.097	2018-61-3	74839	67404	C03519	HMDB00512	568380	722312	784562	705466	1133394	1052999	1008197	1044814	764665	935875	2033856	796245	730319	1207298	1246018	532177	1368672	2228734	869930	477666	1016344	714668	649376	1164380	647181	221219	107204	103129	1074295	440219	869746	1051702	844800	870059	713451	547683
331	N-acetylproline	Amino Acid	Urea cycle; Arginine and Proline Metabolism	34387	LC/MS Neg	100001334	1230	156.067	1074-79-9	322640	285677			81399	93248	81107	85763	62003	86527	50718	40855	63137	72314	83425	87706	76244	67402	23363	53543	48686	50241	37270	71235	60620	92199	69483	62003	83027	87913	77808	51697	48399	48591	94360	73998	70312	56298	90019	48185
10	N-acetylserine	Amino Acid	Glycine, Serine and Threonine Metabolism	37076	LC/MS Pos	100001851	1021	148.06	97-14-3	65249	58744		HMDB02931	4464154	4613139	5914577	4813412	4275596	3243040	3590147	3839733	2943977	3667793	4553230	4171506	5122869	4954372	3288453	3075509	3162092	3958913	3139233	2849838	3495227	4296585	4809831	4457161	4675865	2268755	3322191	3900655	4039633	3337877	3480726	3666450	3793705	3470438	4940274	3148717
312	N-acetyltaurine	Amino Acid	Methionine, Cysteine, SAM and Taurine Metabolism	48187	LC/MS Neg	100005466	800	166.018		159864	140553			4873586	4897497	4448580	5661784	5462049	7332086	6268540	5484682	6187314	6585929	5083441	4245250	4970981	4234571	3682758	5565484	5401775	5007235	6337065	6030749	4634651	3464404	4025282	3943817	4542976	4505197	5332548	6350480	4284578	5338920	5225248	5583771	6030868	5443747	5674062	4200710
15	N-acetylthreonine	Amino Acid	Glycine, Serine and Threonine Metabolism	33939	LC/MS Neg	100001274	821.6	160.062	17093-74-2	152204	3841173	C01118		4442275	2888404	3678135	3040771	2328146	2727364	2054176	3084290	2568331	2793956	3942120	3368704	4217349	3991498	3083261	2495617	3187643	2495617	2808429	2057165	3047412	3172086	2373432	3657141	3061267	2160930	2012982	2738975	2801446	2119175	3093723	3783732	3515925	3389119	5133706	2262993
190	N-acetyltryptophan	Amino Acid	Tryptophan Metabolism	33959	LC/MS Pos	100001254	3540	247.108	1218-34-4	700653	610602	C03137	HMDB13713	15225340	18359240	24361996	13434254	22013460	13473563	10871217	15420019	3937611	14912980	18220612	15346868	17205690	15759469	8408890	7544045	15756771	14294569	10615031	9275341	14423853	15777206	19304434	17445658	11872186	9747897	8136123	7156699	18006180	8007984	10955886	11644117	11080090	11277780	13194830	6929441
110	N-acetyltyrosine	Amino Acid	Phenylalanine and Tyrosine Metabolism	32390	LC/MS Neg	100001104	1680	222.077	537-55-3	68310	61606		HMDB00866	203738	317693	289122	349530	433026	413864	352558	348946	474370	311194	635944	451183	250438	516535	548448	130669	501307	388993	252295	229291	463907	374813	314535	402452	309903	168990	209579	204811	343777	217025	279816	348983	371285	401969	190631	275074
275	N-acetylvaline	Amino Acid	Leucine, Isoleucine and Valine Metabolism	1591	LC/MS Neg	1084	1704	158.082	96-81-1	66789	60154		HMDB11757	423680	427656	477391	378096	480271	326248	223705	331117	231763	259034	428575	425215	561418	517006	359123	174127	361430	314236	331706	226595	332209	337977	397539	410737	440300	231054	253080	293550	282625	257776	378557	326375	343543	334546	466930	243558
333	N-delta-acetylornithine	Amino Acid	Urea cycle; Arginine and Proline Metabolism	43249	LC/MS Neg	100004523	858	173.093		9920500	8096135		HMDB03357	22293794	15817202	13631526	17074212	12989993	15029394	10234946	10198010	12691877	15642789	18724054	17916452	17823274	15891441	23823622	10549364	13494290	9260720	16052874	10229292	19984838	17096494	14925658	21073454	16929418	13607917	12565115	11617796	12233086	11551986	18824322	15965280	15318402	18627266	16550750	13614616
286	N-formylmethionine	Amino Acid	Methionine, Cysteine, SAM and Taurine Metabolism	2829	LC/MS Neg	194	1543.8	176.039	4289-98-9	439750	388809	C03145	HMDB01015	579739	568386	469214	514448	426936	452280	533494	367816	429887	404357	610280	542735	703781	619070	480068	400743	527457	499622	476667	343705	519275	492216	512763	656068	613583	349172	405882	531388	551439	539936	619782	511259	535719	536861	765119	526606
185	N-formylphenylalanine	Amino Acid	Phenylalanine and Tyrosine Metabolism	48433	LC/MS Neg	100006056	2336	192.067	13200-85-6	759256	663938			227844	197894	209827	209072	190262	206044	243502	142654	207307		146983	160137	184478	270371	207848	259641	185698	261548	210419	185949	198340	157328	171793		170908		215071	253158		258603	156430	227310		206524	245332
337	N-methyl proline	Amino Acid	Urea cycle; Arginine and Proline Metabolism	37431	LC/MS Pos	100001956	831	130.086	475-11-6	557	541			3357159	3449447	3031358	3840010	3079743	3353625	2441376	1282905	2812620	3279193	3719835	3116399	4789876	2445206	3738200	1196504	2374900	2828412	2476924	1926900	2656852	2968957	2596960	3390704	2932730	1715479	2052733	1989810	3190414	2959050	2333533	3213253	2250019	3414420	3053994	1414906
1339	N-oleoyltaurine	Lipid	Endocannabinoid	39732	LC/MS Neg	100003119	5610	388.253	52514-04-2	6437033	4941625			186050	170785	122777	159778	161420	591007	494206	358486	763504	345049	336193	344557	258578	113322	114754	434226	142789	550653	199593	589514	306436	182119	450036	217707	160579	425460	785985	385729	300704	698303	265041	458659	394802	388293	552831	551647
1178	N-palmitoyl glycine	Lipid	Fatty Acid Metabolism(Acyl Glycine)	42092	LC/MS Neg	100003686	5580	312.254	2441-41-0	151008	133100		HMDB13034		68809	55870	100009	44599	39728	272317	100584	141748	108924	147643	63261	119872	138970	46941	207167	66981	23357	87571	87300	197059	142578	43991	100428	64655	37343	101723	114973	39566	100272	174628	207233	140510	281448	241560	136724
1567	N-palmitoyl-sphingosine*	Lipid	Sphingolipid Metabolism	48278	LC/MS Polar	1518	703	582.51	24696-26-2	5283564	4446677		HMDB04949	578789	429749	563872	572473	586476	585988	776302	741474	621775	510578	384200	804336	452388	314411	221468	782762	439102	585630	554379	790253	794979	328902	395629	536710	711231	875961	570172	607132	668482	555593	712586	326600	540906	524756	574274	445605
1341	N-palmitoyltaurine	Lipid	Endocannabinoid	39835	LC/MS Neg	100003239	5560	362.237	83982-06-3		14435932				52764	65668	59410	50665		179863	141997	268740		42473	276403	173081			153425		161120		46989	118429		128770	46080		98957	167313	133147	80273	394806	62172	144480	95808	131355	241360	91323
1340	N-stearoyltaurine	Lipid	Endocannabinoid	39730	LC/MS Neg	100003240	5782	390.268	63155-80-6	168274	147194			209093	287158	248114	370347	376904	331295	481868	313645	375255	414394	235452	239592	278469	209432	150457	294483	195050	287212	232181	280665	288921	217568	275841	366925	357313	513155	310752	396530	316312	366305	311868	452535	407872	279159	489196	535972
2418	N1-Methyl-2-pyridone-5-carboxamide	Cofactors and Vitamins	Nicotinate and Nicotinamide Metabolism	40469	LC/MS Pos	100001468	1688	153.066	701-44-0	69698	62899	C05842	HMDB04193	5608099	6715574	6489207	6824273	7632409	7175364	5694381	5779208	7012962	6502607	5777200	4795500	5105196	7117411	4341019	6615023	6672715	6393139	6976998	6712699	5325581	5259378	4454919	5706973	5288793	6220514	5397799	6197703	6542904	6733689	5192891	7361416	6349785	4117194	7874500	4320393
2289	N1-methyladenosine	Nucleotide	Purine Metabolism, Adenine containing	15650	LC/MS Pos	1242	1399	282.12	15763-06-1	27476	4573813	C02494	HMDB03331	4799507	4038907	4590590	4692410	4488766	2549242	2822226	3793720	2632263	3061691	5292884	4842564	6124406	5367793	4602178	3018333	2822626	2505913	3316283	2159934	6498326	4813314	5488891	4242474	4385744	2346660	2809637	2896746	2966970	2926888	3744279	5160545	4550682	5236821	5191594	2464617
2323	N1-methylguanosine	Nucleotide	Purine Metabolism, Guanine containing	31609	LC/MS Pos	100001122	1869	298.115	2140-65-0	96373	86996		HMDB01563						44579	56456	35550		30857	16396				51298	96003	42056		118915	20506	21770		103474				10291		20951	17348	9876
2325	N2,N2-dimethylguanosine	Nucleotide	Purine Metabolism, Guanine containing	35137	LC/MS Pos	100001412	2168	312.13	2140-67-2	92919	83878		HMDB04824	718807	752843	884649	809151	998301	552124	518613	630958	541965	468263	905222	983483	947576	1048081	885447	601575	483687	433494	568440	379544	951475	779130	1128857	863060	778209	472245	476691	566822	380320	613646	693317	741008	810234	897913	862869	491943
334	N2,N5-diacetylornithine	Amino Acid	Urea cycle; Arginine and Proline Metabolism	43591	LC/MS Neg	100004575	1367	215.104	39825-23-5	10398396	8573834			7495095	6582600	7376619	6206817	6809291	4532060	3710019	4840714	1944919	4591333	6554995	8493852	8646641	8553693	6132251	2702008	5719310	3929375	4033820	3639285	5498932	6748869	7936522	7733784	7532691	4125135	3927624	4214312	5837507	3126304	5679040	5611476	5222561	5096221	9380917	3695257
72	N2-acetyllysine	Amino Acid	Lysine Metabolism	36751	LC/MS Pos	100001721	836	189.123	1946-82-3	92907	83869	C12989	HMDB00446	6045919	6365072	6658285	6390675	5978765	5407076	4426338	4809868	3176930	5199757	7143834	5294715	5876288	3701344	4028979	3166030	5226903	4625585	4615867	4247020	5594359	5157695	5726124	5677936	5137366	4481829	3685629	5406973	6235990	3234911	3886881	5874020	3758369	4143403	6251514	3171032
2377	N4-acetylcytidine	Nucleotide	Pyrimidine Metabolism, Cytidine containing	35130	LC/MS Pos	100001413	2040	286.103	3768-18-1	107461	96702		HMDB05923	2470218	2960219	3383707	3066153	2891944	5272779	6210065	4221480	4787932	4793304	4155145	2355913	1844945	1805895	1915971	4680608	3910653	4224702	4588698	3526527	2726676	2442216	2252423	2657681	3290192	4281169	4355970	4731222	3920848	4610984	1907603	3643697	2442148	2332415	1763107	4010220
73	N6-acetyllysine	Amino Acid	Lysine Metabolism	36752	LC/MS Pos	100001734	1140	189.123	692-04-6	92832	83801	C02727	HMDB00206	9344846	9621637	8032727	8821892	7952514	7462276	6330550	7055615	5850019	7610324	9404912	9512496	9722119	9187258	7507116	5848438	9262306	7815390	8033782	4938485	7590571	7475355	5792792	6502752	6692906	3001237	3033897	2918453	4322873	3609452	6331384	6631690	5791531	7291602	5643961	3179647
2299	N6-carbamoylthreonyladenosine	Nucleotide	Purine Metabolism, Adenine containing	35157	LC/MS Pos	100001415	2673	413.142	24719-82-2	161466	141829		HMDB41623	474341	486590	505757	496646	498096	334533	273358	317071	304167	253219	549731	529185	653339	592270	458680	259078	282720	245127	285615	228535	511254	571093	616673	456422	524979	249003	257916	308743	246119	312615	477198	504990	559618	492439	794515	279425
2308	N6-succinyladenosine	Nucleotide	Purine Metabolism, Adenine containing	48130	LC/MS Pos	100001664	2222	384.115	4542-23-8				HMDB00912	873574	868129	1172624	1051480	1215105	1056258	934757	983073	500090	815450	1764193	1545545	1360923	1444753	1908296	682421	786499	754811	685323	728745	1470147	1138508	1685029	1170604	1174482	666973	575940	929576	1040773	746318	865383	921950	866250	985826	1747735	670976
1571	nervonoyl sphingomyelin*	Lipid	Sphingolipid Metabolism	47153	LC/MS Polar	100005986	850	857.675	94359-13-4		24846874		HMDB12107	2151444	890773	1029305	1314002	935609	1107778	870964	1470580	1409111	1111193	2056857	1218713	1879383	2029703	1266902	2087432	948227	798877	679177	695958	1057703	1678376	940969	989032	1119309	1106140	1092970	952614	1482132	1284125	865274	1412672	1399556	1664916	1598637	1875154
2399	nicotinamide	Cofactors and Vitamins	Nicotinate and Nicotinamide Metabolism	594	LC/MS Pos	432	1271.1	123.055	98-92-0	936	911	C00153	HMDB01406	1709071360	1992986496	2036944512	1922355200	1882560896	1873359872	1963998208	1924918400	1843859328	1813529984	1892351744	1749079680	1688653184	1778798592	1619769344	1725145600	1628336256	1956869632	1814230272	1665750400	1818174336	1649901056	1784533760	1687856384	1746508672	1806918016	1743707904	1734281344	1862737280	1740811136	1714213760	1835789056	1729376896	1710800128	1796671872	1642490112
2403	nicotinamide adenine dinucleotide (NAD+)	Cofactors and Vitamins	Nicotinate and Nicotinamide Metabolism	5278	LC/MS Neg	1310	1434	662.102	53-84-9	5893	5681	C00003	HMDB00902	156462	134013	143043	181939	139216	126248	126705	111936	188042	103846	184883	138431	99019	95083	312214	132153	64532	110883	155190	115017	106684	113135	149816	68209	173883	109158	132251	148616	41219	57033	88501	119160	107401	76583	123451	75875
2396	nicotinate	Cofactors and Vitamins	Nicotinate and Nicotinamide Metabolism	1504	LC/MS Pos	567	1238	124.039	59-67-6	938	913	C00253	HMDB01488	3510411	4581323	3118087	3543170	3590819	3279908	1467838	2089335	2563324	2471936	2509428	4076164	2389160	5407662	4723621	674000	2145503	2431145	1534640	1252298	2103648	3927736	2133696	4107338	4910299	1983854	2299832	2458501	2344949	2663050	3365378	3933710	2712481	3393096	1664837	1420575
2397	nicotinate ribonucleoside	Cofactors and Vitamins	Nicotinate and Nicotinamide Metabolism	33471	LC/MS Pos	100001316	1085	256.082	2625-49-2	161234	141635	C05841	HMDB06809	1040198	1573812	846055	851022	1738470	3061608	2513776	2537416	2991251	3298896	592401	813365	586401	925561	1223589	1761938	5095589	4639801	3680275	1948047		95967	1497380	286410	118665	598797	395884	372677	1272889	878802	890103	681045	396666	236734	526894	234521
993	nonadecanoate (19:0)	Lipid	Long Chain Fatty Acid	1356	LC/MS Neg	892	6068	297.28	646-30-0	12591	12071	C16535	HMDB00772	11099093	6781731	5676220	9457084	8182183	6550352	6584655	6776208	13120679	7160533	7848611	9095872	9645311	10108908	11727847	6712031	7557298	5626291	6097143	6889161	8597287	9630076	10493111	7317587	9698360	9833955	7720824	10238382	7573450	7400488	6774838	12637438	10727809	12381652	8926172	10303107
2532	O-methylcatechol sulfate	Xenobiotics	Benzoate Metabolism	46111	LC/MS Neg	100004208	2344	203.002		22473	21078			4523236	3998116	4343959	4197271	2940031	3150287	2029269	3046776	2512138	2267353	4107667	2886223	2908077	2842720	2831895	1757566	2121127	1912982	2542002	2312687	2725813	2225490	2796744	3749928	2503134	2501436	2365514	2136252	1837097	935343	2269089	3314231	1867021	2793594	3792766	1334893
3233	O-sulfo-L-tyrosine	Xenobiotics	Chemical	45413	LC/MS Neg	100005384	990	260.023		514186	448617			865704	1022869	1034071	1001716	977404	796507	812729	788671	716708	763728	984503	1078639	1103747	916977	883119	644306	754351	748590	850166	702264	904107	886774	1021476	792302	952831	797991	835963	914141	790462	772854	953016	820207	900581	961792	1148763	679269
1105	octadecanedioate	Lipid	Fatty Acid, Dicarboxylate	36754	LC/MS Neg	100001615	5042.9	313.238	871-70-5	70095	63283		HMDB00782	2372113	2540285	2832800	2998439	3195542	2178437	3272060	3351350	7972945	3982355	6810361	3023393	3993168	3121182	3181440	1265119	4230645	3684293	1283341	2618416	5074415	4666119	4220945	2990107	4423504	3050963	2921893	2766534	6528836	8423596	4353763	11885152	7399142	5831356	8870843	4157476
1187	octanoylcarnitine	Lipid	Fatty Acid Metabolism(Acyl Carnitine)	33936	LC/MS Pos	100001247	4090	288.217	3671-77-0	123701	110274	C02838	HMDB00791	1489881	1122367	1230565	1531120	1315418	1247816	1420811	1431399	1331941	1268849	1682282	1803046	1687736	1819138	2228552	1348459	868454	1359427	606812	836272	2127279	1517398	1785592	1937665	2218541	498235	925250	746016	1039513	921305	1603888	2017273	1957804	2210981	1602833	1269649
987	oleate (18:1n9)	Lipid	Long Chain Fatty Acid	1359	GC/MS	442	1984.4	339.2	112-80-1	445639	393217	C00712	HMDB00207	5582833	3264526	5203430	5397354	3956867	3630164	2867483	3971744	6414534	2732992	4282007	4379305	7558706	4478269	5522954	2818016	1805325	2491976	3281757	3287888	4427382	4685651	9306820	3579949	4154464	4868905	3722950	6126411	2949169	3710648	3723654	3697831	4840239	3320385	4072985	3198490
1329	oleic ethanolamide	Lipid	Endocannabinoid	38102	LC/MS Neg	1137	6900	324.291	11-58-0;111-58-0	5283454	4446574		HMDB02088	2610068	1966074	1584781	1723529	1700815	1277589	2055782	1592240	2008846	1662272	2936352	1867225	2491877	2095618	2256555	2499541	1273848	1253613	1866172	1467435	3041218	2576723	1697662	2253295	1568376	1427780	1566010	2017054	1598934	2069578	2638295	3064124	2452578	2966198	2858273	1282704
1555	oleoyl sphingomyelin	Lipid	Sphingolipid Metabolism	37529	LC/MS Polar	100002106	865	773.581	108392-10-5	6443882	4947837		HMDB12101		140250						152934	137613	117812	127161	123549	257282			93965				103740	215376	129653	103968	180018	138828		146536	143940			118085	210120		204594	155312	91308
1197	oleoylcarnitine	Lipid	Fatty Acid Metabolism(Acyl Carnitine)	35160	LC/MS Pos	100001501	5215	426.358	38677-66-6	6441392;53477789	21403150		HMDB05065	30148386	30376782	42236968	34379700	41660812	52365280	61678880	55742576	62505648	53002388	38824312	29170176	27758240	36001964	33526346	36997840	37542912	61824740	36517408	43047072	41853348	24028470	41014120	39254948	31592776	49876960	54823604	47921820	58767028	59026216	34753812	43625036	42849496	37022392	49934932	42629440
379	ophthalmate	Amino Acid	Glutathione Metabolism	34592	LC/MS Pos	100001311	1462	290.135	495-27-2	7018721	7993181		HMDB05765	20491964	16550245	15109476	24283490	19431540	18450198	19170686	24593298	14436483	18020098	19722932	17425412	15300821	14850546	18626896	9700811	14742152	16446159	14049666	12685648	17255542	18451376	25050158	17948820	16581374	16168993	11429719	18444756	15055219	12715249	15588922	15641997	11068079	12483588	28638330	13009586
320	ornithine	Amino Acid	Urea cycle; Arginine and Proline Metabolism	1493	LC/MS Pos	444	614	133.097	3184-13-2	6262	6026	C00077	HMDB03374	13492515	3069963	13749761	19380042	12338825	12611408	9045294	10643678	8820456	9656884	11416282	19007256	13003550	12885766	16465950	6381194	13513381	14285684	9331710	11410721	5605299	14464357	14240338	14928456	13076993	2888792	4298686	15845300	13437188	9297298	9531598	5132680	9410744	12138645	13114250	9156705
2336	orotate	Nucleotide	Pyrimidine Metabolism, Orotate containing	1505	LC/MS Polar	445	1638.1	155.01	50887-69-9	967	942	C00295	HMDB00226	49690484	52715988	62920984	52963748	45924000	21114292	21178786	18608986	19959562	17376178	41740888	48595656	59987244	46133984	38057848	12409759	22190604	26596942	22701610	19559018	45314416	52681616	58949892	41111120	48029156	26367962	27246238	29534742	26194948	28528404	44392212	43885984	57449932	54273336	55067000	20368902
2338	orotidine	Nucleotide	Pyrimidine Metabolism, Orotate containing	35172	LC/MS Polar	100001416	2250	287.052	314-50-1	92751	83729	C01103	HMDB00788	4763108	4758710	5154567	4359817	4626851	3961306	3832043	4039457	3199475	3807789	4359073	4747054	4616998	4353484	3929720	3434996	4113330	4209374	3875818	3514865	4598549	4425526	4758866	4750910	4746606	4228600	3773635	4113645	4111798	3646490	3920104	4696284	4873843	4104495	5576474	4117172
2436	oxalate (ethanedioate)	Cofactors and Vitamins	Ascorbate and Aldarate Metabolism	20694	LC/MS Neg	100000841	603	88.988	144-62-7	971	946	C00209	HMDB02329	3263418	3317448	2124042	2907759	2051522	2604779	3149426	2349957	8831047	2368348	2311974	2383506	1997814	1660365	847325	3192330	1842194	2541028	1923336	3381419	2819642	1805599	1877140	2764912	1702492	3147517	3389477	4426332	2417981	2957200	3467978	2956747	2379506	2627799	4232401	3394717
126	p-cresol sulfate	Amino Acid	Phenylalanine and Tyrosine Metabolism	36103	LC/MS Neg	100001315	2890	187.007	3233-57-7	4615423	3806480	C01468	HMDB11635	5045952	4325433	3915923	9724398	15153264	30080876	28130014	32439698	45936056	38805832	17569386	4208339	7151396	1793062	5812755	10153384	29954076	29919784	17666868	37184024	23934322	7151988	15652094	8347954	21118728	22719114	36234000	20824636	43222356	32403466	7427593	21279992	8425146	4306561	42213092	40097428
183	p-cresol-glucuronide*	Amino Acid	Phenylalanine and Tyrosine Metabolism	48841	LC/MS Neg	100006191	2420	283.082	17680-99-8	154035	135751		HMDB11686	742298	586723	560467	2307666	4276381	4813522	4769728	7777561	10709372	6269931	4310428	829230	2974287	436601	1696390	1257808	4857315	7413093	2743582	8202646	7522299	1926725	4879748	4218756	5619301	6032714	8486075	4770067	9867582	7344362	3484246	6564983	2221329	1728984	11822280	8929108
980	palmitate (16:0)	Lipid	Long Chain Fatty Acid	1336	LC/MS Neg	424	5618	255.233	57-10-3	985	960	C00249	HMDB00220	5349074432	3577225728	3051564800	5159526912	4217916928	3743937536	3483147008	3490863616	4698317824	2832940544	4550424064	5045479424	5252510208	4771642368	5318364160	3272287488	3092484608	3035582720	3430289664	3756206592	4852407296	5041021952	5339767808	3643877376	5151151104	4092638464	4274163456	4663487488	3231105792	3699652608	3570385920	5499867136	4570219520	5547533312	5049701888	3944659712
981	palmitoleate (16:1n7)	Lipid	Long Chain Fatty Acid	33447	LC/MS Neg	452	5475	253.217	373-49-9	445638	393216	C08362	HMDB03229	636339008	271849216	198050640	434622944	372696768	339427616	382536288	288690176	511746048	232353424	560095936	505181856	586141568	417648928	506245280	423635360	199707888	181386640	277505184	381660192	635760448	477409024	640268864	269294016	455823168	377944672	499623552	446661728	221587072	414578752	436303680	649937792	592886400	634131520	580464448	354632224
1572	palmitoleoyl sphingomyelin*	Lipid	Sphingolipid Metabolism	42459	LC/MS Polar	100004329	866	745.55					HMDB29216	668339	736939	754235	693628	679548	627181	593748	718807	576349	817197	834500	734708	838857	687798	395354	654017	626668	594880	681244	624882	884867	733227	651669	819905	625494	580097	791661	595146	599275	587176	806330	770308	767130	785064	687461	671653
1332	palmitoyl ethanolamide	Lipid	Endocannabinoid	38165	LC/MS Neg	1489	6760	298.275	544-31-0	4671	4509	C16512	HMDB02100	3348388	3168424	2369908	2970999	2708717	1976675	3004297	2608257	2700070	2640319	4186970	3135424	3438898	3032142	3017209	3299693	2384026	2028064	2229660	2242880	4242151	3559749	2094156	3871223	3502298	2124732	2364208	2519231	2266307	2726451	3587007	3882423	3622162	3966569	3761899	2165766
1553	palmitoyl sphingomyelin	Lipid	Sphingolipid Metabolism	37506	LC/MS Polar	100002107	870	747.566	6254-89-3	9939941	8115562		HMDB61712	4578927	3757404	4278761	3774101	4342731	5155137	5380087	5239405	4933401	5425641	4644550	3520991	4769301	4167506	3766330	6159998	5853498	4781815	4209445	5284803	4840480	4626708	3535620	4654145	4108087	4040277	5491161	4655092	5695111	4730539	3922250	5029940	4400006	4685518	4644550	5480315
1485	palmitoyl-arachidonoyl-glycerophosphocholine (1)*	Lipid	Lysolipid	48383	LC/MS Polar	100006132	870	826.56					HMDB07983	208165	8220805	5342662	4975186	5109313	4309025	7631917		3378481		161331	10673840	329776	234036	213220	292148	276179	5044847	4278440	6899150	199674	646732	5396483	315042	8923526	5082607	6994536	4054451	237427	3878177	6297966	863061	369960	499914	351387
1486	palmitoyl-arachidonoyl-glycerophosphocholine (2)*	Lipid	Lysolipid	48392	LC/MS Polar	100006157	790	826.56					HMDB07983	21203914	17688918	17486482	19023568	17013664	15003373	17167532	18663766	15977780	20437492	20851746	21021562	26626750	24651578	27393758	20230926	19966864	16254182	15984875	14920392	22370372	25032830	15810295	26331622	16311854	15993495	14938036	15043994	17992762	15409289	18281442	28113694	26203696	26183712	27544946	20548748
1487	palmitoyl-linoleoyl-glycerophosphocholine (1)*	Lipid	Lysolipid	48385	LC/MS Polar	100006133	870	802.56					HMDB07973	18587244	12437663	15391075	10583362	14897859	11673308	9536026	11176633	10062314	10621538	12852730	16757779	22413678	15165253	16878436	11093915	8224297	11452397	10757273	9851518	16871150	13314925	13316653	16573037	14237931	11403482	9561317	9477510	11663012	9411756	16176967	13021843	15296215	11314128	16250373	8773094
1488	palmitoyl-linoleoyl-glycerophosphocholine (2)*	Lipid	Lysolipid	48269	LC/MS Polar	100006134	783	802.56					HMDB07973	24435240	21360704	23029134	28542190	22282888	18412620	16262503	17342830	18474750	20281930	25773114	28479904	21932018	27323634	26574962	17705400	17451108	17152858	17743616	16218476	24027724	22058352	21751376	24992868	25478886	18566072	15807533	15861170	16984502	15973905	24316940	24812944	24417298	27341802	19809960	17933808
1490	palmitoyl-oleoyl-glycerophosphocholine (1)*	Lipid	Lysolipid	48267	LC/MS Polar	100006142	853	804.576					HMDB07972	10015197	7562820	9647103	6237480	9435256	7258262	7046104	7568061	5944574	6721616	7159541	9703835	9900538	7522506	7536516	7632983	5426680	7954310	6844477	7062118	9735158	6881472	8176680	9583170	9732500	8288122	7193150	6675281	8296045	6274405	9763093	8213991	8651427	6877577	11170792	5820638
1497	palmitoyl-oleoyl-glycerophosphoglycerol (2)*	Lipid	Lysolipid	48391	LC/MS Polar	100006159	745	747.519					HMDB10574	2610716	3135927	2894535	2756251	3110784	2981326	2705887	2756896	2540190	2431899	2965145	2853113	2427620	2385517	2684539	2631918	2535408	2639536	2342565	2612457	3319253	2565810	3158220	3170578	3347342	3021697	2383227	2747467	2531064	3071202	3224386	2918415	2841094	3023489	3082397	2047487
1498	palmitoyl-palmitoyl-glycerophosphocholine (1)*	Lipid	Lysolipid	48276	LC/MS Polar	100006160	854	778.56					HMDB00564	11415125	8310893	10088395	7387559	10266980	8371445	8953638	12157443	7469034	9408766	9623840	9404211	12549957	9488291	8758929	10518665	9276028	9054256	7553655	8699467	13021161	9816202	7957952	12126567	9822121	9084299	8732617	7970379	10955039	7639227	10019164	10065946	11719886	8738735	12222382	8463345
1499	palmitoyl-palmitoyl-glycerophosphocholine (2)*	Lipid	Lysolipid	48389	LC/MS Polar	100006161	790	778.56					HMDB00564	9340910	8951429	10273489	11777259	10803257	9160324	9762512	9948271	9802488	9231628	10586649	10297741	8344521	10279755	8443532	9444959	9577091	10256336	8670740	9047667	10762685	8774572	9115947	9379384	11282334	9644890	9619603	9724707	8276007	9285122	9586526	9123460	11077271	11426575	8895911	10824827
1195	palmitoylcarnitine	Lipid	Fatty Acid Metabolism(Acyl Carnitine)	44681	LC/MS Pos	100000776	5204	400.342	6865-14-1	461	448	C02990	HMDB00222	60786088	52023064	70111792	61096276	66123728	67336904	77842552	62237884	70457936	72747432	62343884	56307676	47024868	58783928	62403132	54617296	46733872	67547664	54515688	58045496	67497592	42121820	62043932	67745024	56485916	65205396	62333220	56160912	66538532	67809920	61219272	66007016	65393768	54233332	65655356	56107496
2424	pantothenate	Cofactors and Vitamins	Pantothenate and CoA Metabolism	1508	LC/MS Pos	1024	2212.4	220.118	137-08-6	6613	6361	C00864	HMDB00210	42910484	47514760	56402956	49260160	46538340	37831596	34829664	36346772	27099288	34636064	56822216	52520620	54183332	54816920	51501804	24604584	30660618	26536676	30819308	30141716	46804064	51787876	54941288	43075284	45846480	37139488	29740134	32498440	35259328	34443584	41836664	50887644	43040704	54155784	55825524	22868508
979	pentadecanoate (15:0)	Lipid	Long Chain Fatty Acid	1361	LC/MS Neg	980	5521	241.217	1002-84-2;10002-84-2	13849	13249	C16537	HMDB00826	127701280	89067168	73701952	112673592	107029976	66619396	61369404	56946896	104798144	57592144	96166408	130006824	111215520	147536016	138473536	53251476	81757576	65164100	77259696	68746656	99482056	127938384	155535120	77329720	149812368	74804776	71643096	74585520	56825488	75479208	73701952	119264632	93300096	125617648	88969656	80839496
124	phenol sulfate	Amino Acid	Phenylalanine and Tyrosine Metabolism	32553	LC/MS Neg	100001510	2156	172.991	937-34-8	74426	67018	C02180	HMDB60015	40830268	42139928	58015552	61028268	61889132	36442724	32584500	54508004	38697528	67878112	52662248	56302612	40930632	48854088	66231964	23062442	40219160	64735592	126664768	36339680	27122006	24644428	55290420	75228928	115120544	50716692	68927856	62178100	70066072	32295216	24096138	98089160	81776080	65060292	67813832	35300632
104	phenylacetate	Amino Acid	Phenylalanine and Tyrosine Metabolism	15958	LC/MS Neg	100000011	2110.8	135.045	103-82-2	999	10181341	C07086	HMDB00209		143496		49340	76059	39796	135578	90153	277408	115385	183102			45772	119469					89294	118900	23156	100978	70395	86262	36356	193046	52619	356257	294268	63860	197558	144271	87385	147646	151251
180	phenylacetylcarnitine	Amino Acid	Phenylalanine and Tyrosine Metabolism	48425	LC/MS Pos	100006108	2687	280.154	287108-21-8								72035		80775	90446	54548	224751	45554	19673							66434		19220			86495	20418	110566		67258		190638	163827		68210				101580
108	phenylacetylglutamine	Amino Acid	Phenylalanine and Tyrosine Metabolism	35126	LC/MS Neg	100001417	2330	263.104	28047-15-6	92258	270643	C04148	HMDB06344	86424	120731	170689	160755	147723	180916	157409	283729	217342	256613	329139	181227	183879	140635	192114		103624	176683	51455	186531	278108	128733	519372	186842	339019	257268	245792	218674	464100	362382	145253	361416	238820	143191	393077	326954
107	phenylacetylglycine	Amino Acid	Phenylalanine and Tyrosine Metabolism	33945	LC/MS Neg	100001275	2375	192.067	500-98-1	68144	61452	C05598	HMDB00821	22486992	24381718	25065452	33160816	33517502	36807868	35798480	47710568	41763244	41887888	40176768	28425514	29255650	19758878	22410500	5236343	20466930	34377816	22073142	40116804	33773384	18594768	50366432	31759732	51958944	41046936	43027612	33414428	68941576	45952116	22511892	44949024	38129524	16281780	49169936	52670684
96	phenylalanine	Amino Acid	Phenylalanine and Tyrosine Metabolism	64	LC/MS Pos	460	2050	166.086	63-91-2	6140	5910	C00079	HMDB00159	1792384768	1910578816	1979376512	1935373056	1959606912	1946474752	1928393984	2062590208	1676629248	1789249152	1972020864	2166320896	1945496960	1748893568	1788408960	1401369472	1985922816	1884667136	1906860288	1825383040	2089774208	1967357184	2093798528	1934375680	1803897728	1887332736	1647946240	1965005952	1947523712	1614711552	1564330112	1851442688	1464497408	1588740352	2066824960	1730306944
602	phenylalanylglycine	Peptide	Dipeptide	41370	LC/MS Pos	100003588	2155	223.108	721-90-4	98207	88678		HMDB28995	136407		189457	271531	204650	71482		143247	72481		101608	363251	148691	122224	190765				110618			320427	171653	189285				51422							187178
3320	phenylcarnitine*	Xenobiotics	Chemical	43265	LC/MS Pos	100004555	2629.9	266.139	105450-08-6					371671	388698	476576	685895	316434	373072	105418	88446	86198	198530	350483	398093	253716	383826	498035	116870	411163	274747	367855	258079	123930	266180	340585	460865	396683	164822	178397	233438	255493	195056	207837	221804	198078	284828	117501	188951
101	phenyllactate (PLA)	Amino Acid	Phenylalanine and Tyrosine Metabolism	22130	LC/MS Neg	100000774	2208	165.056	828-01-3	3848	3715	C05607	HMDB00779	6808598	6821921	11685350	8895466	5499859	7257095	1431963	4666969	5128580	1343407	3843240	5727214	7270221	6646244	8251062	1517966	3186318	4359994	7329746	3471196	2537531	6338259	5037739	3835228	5702819	1570693	1042427	1397613	1321032	1220086	4601414	5723931	4913656	2524566	2390499	1983870
161	phenylpropionylglycine	Amino Acid	Phenylalanine and Tyrosine Metabolism	35434	LC/MS Neg	100001591	2945.3	206.082	56613-60-6	152323	134261		HMDB00860	1519627	781762	981764	705144	1055354	602220	569274	602547	222924	337695	1095065	2622248	1533552	2178843	900212	158470	698821	606541	447139	545683	843252	1032104	1671696	1115779	1181323	405083	269691	267978	350984	178545	1009550	687803	492083	841386	1368120	514622
100	phenylpyruvate	Amino Acid	Phenylalanine and Tyrosine Metabolism	566	LC/MS Neg	241	2517.6	163.04	156-06-9	997	972	C00166	HMDB00205	236422	327114	504536	360965	453003	240781	328043	338351	196663	184694	317929	391654	452907	352827	334022	189030	279208	293522	208202	243339	342343	322219	358664	321333	348583	120665	193340	196368	302521	200580	178842	260187	369979	219965	316024	259019
965	phosphate	Energy	Oxidative Phosphorylation	42109	LC/MS Neg	461	608	96.9696	7664-38-2	1061	1032	C00009	HMDB01429	223466800	250079040	265243040	230595824	232226640	210490640	217625296	191616464	197354160	170987136	238467504	203574064	200836448	131933224	106587712	161898960	170624320	191686432	169393888	177992272	240268176	227381552	196232752	238979360	226012480	177333680	203767344	234967776	228390128	222052976	233259280	209677456	210549488	204762752	251244912	179298288
1378	phosphoethanolamine	Lipid	Phospholipid Metabolism	1600	LC/MS Neg	1026	638	140.012	1071-23-4	1015	990	C00346	HMDB00224	1679892	2168928	1884716	2194587	1865216	3106242	2777801	2396553	2466704	2030122	1695024	1463638	1168766	626005	383889	2510977	2071712	2450245	3252107	2816739	2174322	2041012	1052267	2167137	2068119	2351808	2692744	3322650	2712722	2306663	2313369	2014113	1820417	1910201	3025457	2180503
207	picolinate	Amino Acid	Tryptophan Metabolism	1512	LC/MS Pos	1022	1117	124.039	98-98-6	1018	993	C10164	HMDB02243	10583266	9546764	10741191	10066185	9883830	7906952	9540167	7572419	11031429	9883830	10404185	10161623	9427885	10841957	8422560	9503731	11828446	11650570	10659165	8606924	11615034	10655440	8474438	10001616	8945246	7509545	8441543	7229412	9862431	9211072	9004193	11729129	9115981	14605052	10538056	5902991
1346	pinitol	Lipid	Inositol Metabolism	37086	GC/MS	100001860	1773	318.1	10284-63-6	164619	10369209	C03844	HMDB34219	359401	470660	307478	382574	298957	328915	205002	211651	181670	265118	342786	511835	365258	272282	385760	166086	201267	181262	204092	218041	238782	465025	506098	437520	323449	192676	197011	171945	187801	89522	352596	202337	260034	299724	245034	101625
88	pipecolate	Amino Acid	Lysine Metabolism	1444	LC/MS Pos	1025	1120	130.086	4043-87-2	849	826	C00408	HMDB00070	397658176	289824704	298998240	380738304	291441856	557633344	464944192	474598912	425196384	545466688	401707552	293059040	301321600	254623408	291441856	70627968	72669160	80267824	95064016	355875200	120556480	131412160	207330832	455432096	368565408	629288064	389480640	540170432	462730624	426775968	364829088	410366976	393952192	71340536	85450056	531550464
2586	piperidine	Xenobiotics	Food Component/Plant	38183	LC/MS Pos	100002398	1139	86.0964	110-89-4	8082	7791	C01746	HMDB34301	1062894	1398055	1043693	1147569	1072962	2058295	1110038	1415464	832772	1105476	2997160	1583171	8466270	2980227	13083601	1328511	1203387	2629326	805994	1301595	1360634	1655038	1178770	1692567	2178334	1070981	957109	775379	950941	1224583	1178770	1861930	1913320	3746331	1410967	624784
341	pro-hydroxy-pro	Amino Acid	Urea cycle; Arginine and Proline Metabolism	35127	LC/MS Pos	100001167	950	229.118	18684-24-7	11673055	9847785		HMDB06695	52409672	37465136	22818020	29742042	20985548	30828666	24079754	16600432	12264465	34300952	68986280	33123272	24804438	23418640	45892352	36620464	20849916	11202166	40761508	15576558	73682672	39156744	22345070	53518204	39214460	34754120	24558304	16346770	26943974	18438064	80653608	45125624	33846840	40459916	38698920	34422628
321	proline	Amino Acid	Urea cycle; Arginine and Proline Metabolism	1898	LC/MS Pos	480	805	116.071	147-85-3	145742	128566	C00148	HMDB00162	1288455552	1509021952	1341559552	1516259968	1113744640	1184239616	907162688	810307968	1099907200	997761024	1141888000	1592066944	1320766464	1218497280	1268059904	607461376	942534272	993460096	960502784	1014843264	1142311168	1440200960	1047980608	1298208000	1324146688	881557248	1028460544	1008162752	993588864	851432576	985488640	1089843456	974673280	1218262912	948900032	744625216
1169	propionylcarnitine	Lipid	Fatty Acid Metabolism (also BCAA Metabolism)	32452	LC/MS Pos	100001162	1590	218.139	17298-37-2	107738	96904	C03017	HMDB00824	402372128	356968768	365628256	355541760	408483296	448336352	439832864	359004000	408341728	430968288	385901408	397097024	320562688	520872256	426986752	230338912	434281216	512261728	408341728	351422784	365649440	348319392	419816608	472122432	540296768	240839856	291992352	234576800	396864448	301104896	353207872	355952192	353419840	403034496	351710048	255145888
1170	propionylglycine	Lipid	Fatty Acid Metabolism (also BCAA Metabolism)	31932	LC/MS Neg	100001150	960	130.051	21709-90-0	98681	89122		HMDB00783	25214808	16332077	15685086	5546253	14637790	10991539	9800996	6293767	8070240	10479750	6716663	15305651	11420011	20923604	8355843	3086754	9311505	11679211	13765453	10005967	8191920	11461621	8165999	10074038	12297046	6017395	5034529	5445535	8415069	4767659	6976802	3874041	5015388	5876043	7709291	4994974
1267	prostaglandin E2	Lipid	Eicosanoid	7746	LC/MS Neg	487	4573	351.218	363-24-6	5280360	4444059	C00584	HMDB01220	457398	601052	431915	1696813	569609	51107		522503	134967	38872	376440	3244532	1266509	1216662	408642	67647	366668	36096		526443	1384133	1475113	1912771	661826	3547674	1141504	2328019	1891363	1949300	1041875	923813	1939830	1033969	2774092	416711	2244009
2350	pseudouridine	Nucleotide	Pyrimidine Metabolism, Uracil containing	33442	LC/MS Pos	821	1173	245.077	1445-07-4	15047	21403010	C02067	HMDB00767	18116500	17760460	18748716	19366106	19160886	17087580	18716944	20516034	20067154	17495288	23850802	19834044	20618460	17828706	17636960	17517046	15822345	15638683	15843122	15773165	22119314	19191612	20916746	19419832	18533780	17236704	16683466	18560124	14715239	16304518	18213420	20048986	20283640	17846944	22907872	15040106
2462	pterin	Cofactors and Vitamins	Pterin Metabolism	43023	LC/MS Pos	100004216	1545	164.057	22363-60-4	73000	65806	C00715	HMDB00802	178284	97348	191286	29878	55704	76826	172691		88539	38610	76958	42457	50531		397809	23836	61951		139012	21345	34071	32528			23396						16308		32516		189860
356	putrescine	Amino Acid	Polyamine Metabolism	1408	GC/MS	49	1705.8	174	110-60-1	1045	13837702	C00134	HMDB01414	326914	221937	349216	272047	250218	164591	120512	129155	127110	172881	241938	171680	346724	110656	442695	113362	87882	61442	123924	69333	335600	168346	230217	273664	291017	103788	95582	109281	81910	84620	219178	131149	159218	190104	186600	56399
2498	pyridoxal	Cofactors and Vitamins	Vitamin B6 Metabolism	1651	LC/MS Pos	491	1203	168.066	65-22-5	1050	1021	C00250	HMDB01545	2281096	4319714	1691117	3144920	3332335	10264258	11828193	9704275	9717791	10581956	5425816	4366036	4218486	4040295	4109425	6773156	9396363	9643487	7750115	11914091	4545915	4999707	3918995	4375603	3921658	9128171	9984126	8330453	12116929	10511453	5340567	9136868	6865199	4752861	13366015	5608957
2499	pyridoxate	Cofactors and Vitamins	Vitamin B6 Metabolism	31555	LC/MS Neg	100001121	2185	182.046	82-82-6	6723	6467	C00847	HMDB00017	778370	1048359	1229023	971096	1342261	1391332	1385805	1296332	803975	1292261	2092646	1226121	1264820	1283535	995144	794720	1439743	1546111	1147643	1027759	1164361	874327	1188252	1498888	1295300	921458	1096713	1182623	1557193	1208276	1014653	1679097	1213359	1508707	1590207	715236
47	pyroglutamine*	Amino Acid	Glutamate Metabolism	46225	LC/MS Pos	100001540	750	129.066	2353-44-8	134508	118562		HMDB00267	4122928	3314767	3957346	3811285	3736295	4727547	6561017	4965445	5755275	4689580	4344197	3723916	4632691	4016168	4616861	6466709	6244356	4667230	5463473	4764530	5032388	3335145	4638177	4079521	4170280	4892157	5311145	4564476	3919926	4621748	3232689	4368205	3811976	4232512	4124816	6191584
2924	pyrraline	Xenobiotics	Food Component/Plant	48428	LC/MS Neg	100001767	2304	253.119	74509-14-1		19980286		HMDB33143	720246	1296523	785160	1078588	558649	355160	515269	241816	366780	304830	399929	1213705	782884	708111	747501	132628	308251	397403	398847	309069	245323	811004	492770	676088	1047509	194711	280114	210220	337177	89885	346873	518757	418404	915227	337460	71400
777	pyruvate	Carbohydrate	Glycolysis, Gluconeogenesis, and Pyruvate Metabolism	42582	LC/MS Neg	823	732.4	87.0088	127-17-3	1060	96901	C00022	HMDB00243	47561624	54840288	54422196	49651432	55114580	28463682	27799800	23617450	17173038	23537804	44297204	47616236	44604500	37462792	23496504	19662658	24247378	23601586	21039734	11863474	33886564	33512806	33886564	40167888	44353640	9951277	18692580	19361306	16155128	16121204	14174993	24403274	21626894	32324326	6589380	8858491
2853	quinate	Xenobiotics	Food Component/Plant	18335	LC/MS Polar	100000442	2432.9	191.056	77-95-2	6508	10246715	C00296	HMDB03072	449916	811036	869038	734473	752893	133033	113292			97651	305203	764578	718132	15259	226891			42892	99829	109865	275940		8450	79577	754667					109913	373449		123981
797	ribitol	Carbohydrate	Pentose Metabolism	15772	LC/MS Polar	100000406	1789.6	151.061	488-81-3	6912	10254628	C00474	HMDB00508	46844	1044326	971925	914251	1044767	1043066	894513	547487	458728	468618	284662	1135873		460096	822975	266619	216548	891726	469495	596969	454802	312153	1123775	480247	1124463	1099705	654336	586319	307962	744738	910890		188190		67603
2421	riboflavin (Vitamin B2)	Cofactors and Vitamins	Riboflavin Metabolism	1827	LC/MS Pos	500	3098.3	377.146	83-88-5	493570	431981	C00255	HMDB00244	1115680	1195791	1498046	1527662	1520435	1178186	1375617	2062532	875027	1431084	3230041	1957134	2514713	2547661	2302052	749241	1148289	1489216	742676	1135992	3112895	1919911	2545971	2293188	1604863	1125821	1060803	985990	2098632	1708828	2166942	2485107	2403080	2437037	3081715	678479
798	ribonate	Carbohydrate	Pentose Metabolism	27731	LC/MS Polar	100001007	2425	165.04	5336-08-03	5460677	4574162		HMDB00867	15921629	25083532	30279502	20664080	27769484	25958536	22956022	19865494	15139188	26560636	20713034	25696118	17405934	19089836	19523066	12881213	19229546	27155692	20788566	23843034	22499394	17427494	31362614	20072060	21513536	27321696	22472904	21029732	19493528	18952800	25247374	16282920	12306174	14781619	20760770	18102922
796	ribose	Carbohydrate	Pentose Metabolism	12080	GC/MS	914	1639.2	204	50-69-1	5779	4470639	C00121	HMDB00283	129740	141906	159663	174775	165264	113933	120218	79836	61617	77021	120541	174014	204540	215554	234143	71741	180071	80844	107422	78902	131523	228628	198566	151036	119357	118474	113496	114580	110710	107233	127933	90099	127933	136752	137750	67318
786	ribose 5-phosphate	Carbohydrate	Pentose Phosphate Pathway	561	GC/MS	19	1928.4	315.1	18265-46-8;108321-05-7		394672	C00117	HMDB01548	590262	701135	642116	555031	687749	506923	425331	482394	310718	427282	701897	597950	962887	688224	818454	313570	561736	508531	503288	393335	628117	515581	1121343	639527	484634	465915	283374	248669	341556	272370	557295	445850	509770	367260	456985	316950
794	ribulose	Carbohydrate	Pentose Metabolism	35855	GC/MS	100000147	1662	306.1	488-84-6	151261	71354	C00309	HMDB00621	375081	479502	433994	444616	441164	295734	206984	303522	154654	235590	441528	446009	607818	370765	421654	184191	313653	290540	185051	209978	382094	429421	714926	466211	347546	362526	222703	278554	344418	243107	363175	243612	271057	204556	226809	203392
3278	S-(3-hydroxypropyl)mercapturic acid (HPMA)	Xenobiotics	Chemical	44552	LC/MS Neg	100004568	1576	220.065	23127-40-4	3371179	2616726			147801	173123	166029	168711	135994	165400	88083	139722	91561	111991	140701	156086	115286	143070	171344	27089	90819	98057	102501	100433	75030	228692	144844	128745	170827	91026	70844	65890	104111	34229	78240	150073	96217	129133	124374	51057
292	S-adenosylhomocysteine (SAH)	Amino Acid	Methionine, Cysteine, SAM and Taurine Metabolism	42382	LC/MS Neg	197	1832.4	383.114	979-92-0	439155	16788012	C00021	HMDB00939	1737800	2530326	2604517	1909353	2616462	2655414	3194362	2873248	2315500	2429868	2399366	1951088	2080651	1180660	1523306	2117673	2362267	3045227	2600663	1768666	1909835	1408834	1667891	1914253	1654251	1444454	1339940	1466075	2020982	1575938	1668230	1378536	1540337	1205285	2187838	993198
375	S-lactoylglutathione	Amino Acid	Glutathione Metabolism	15731	LC/MS Neg	1343	1248	378.098	54398-03-7	440018	1053	C03451	HMDB01066	1861458	2680801	5457155	2250503	5014871	1347992	897127	1247277	135052	1307986	2853686	3433245	4792016	6121497	1202460	602202	1506744	1647592	537570	581281	3825903	3129714	5492413	2790177	2604385	1300046	656645	426241	1479185	807202	1492965	1320206	2412234	3020269	1150988	1598371
304	S-methylcysteine	Amino Acid	Methionine, Cysteine, SAM and Taurine Metabolism	39592	LC/MS Neg	100002749	880	134.028	1187-84-4	24417	22826		HMDB02108	167313	190729	180570	167243	155721	216913	213006	231004	208266	202476	185571	176934	152118	163708	169281	203856	210092	187467	232811	210090	210607	165842	170464	178854	163240	235045	238777	263145	234466	240081	183247	203697	184892	182891	232673	210166
374	S-methylglutathione	Amino Acid	Glutathione Metabolism	33944	LC/MS Neg	100001259	1075	320.092	2922-56-7	3605667	2841309	C11347		803524	1037468	1232250	1122500	1161116	997355	921438	992762	672208	718345	846419	961548	903204	782750	1017246	762691	943836	907026	727799	830797	919358	734153	893252	876248	896912	703697	687103	785551	723353	637801	864870	787362	979485	850422	1051446	650193
381	S-nitrosoglutathione (GSNO)	Amino Acid	Glutathione Metabolism	47127	LC/MS Pos	100004662	1748	337.081	57564-91-7	3514	3394		HMDB04645	63114	239884	582488	217047	463594	55809	181144	180785	39919	137327	394274	482786	490928	626096	694828	58004	283042	334270	176533	124271	459278	430108	516878	304272	441888	108956	139870	58281	229180	129020	52511	137336	287615	708345	110788	257780
3144	salicylate	Xenobiotics	Drug	1515	LC/MS Neg	501	2195	137.024	69-72-7	338	331	C00805	HMDB01895	6623286	7585072	7689547	6071803	6213787	7467082	5643991	5937260	6469449	6388138	9805779	6128689	7738821	6119416	5607407	4970687	6334189	5033301	6561513	5003196	6657164	6347662	7211787	6607560	6422267	5215380	6188693	6877534	5370842	7044574	6738635	7162253	6874611	6183863	8347562	5451292
4	sarcosine (N-Methylglycine)	Amino Acid	Glycine, Serine and Threonine Metabolism	1516	GC/MS	1023	1182.9	116	107-97-1	1088	1057	C00213	HMDB00271	1608259	1786094	1431434	1339045	1083460	1075669	783130	923280	817646	1259911	1405467	1650045	1808870	1435367	1316664	659534	1979787	880871	854248	1534620	1667310	1581603	1544505	1612371	1217803	1047850	785960	715207	1628567	1274624	1210654	1212419	1060225	1708465	1097504	752138
1099	sebacate (decanedioate)	Lipid	Fatty Acid, Dicarboxylate	32398	LC/MS Neg	100001211	1788	201.113	111-20-6	5192	5004	C08277	HMDB00792	211955	693798	929018	804105	756362	766961	1358314	1397520	3962835	989270	1795431	747533	1161383	946419		327107	715983	946255	207568	1187063	1242398	1046517	1335093	1548976	857751		766199	720534	1117512	1892566	710473	1530662	1121871	1427932	1399676	3803997
9	serine	Amino Acid	Glycine, Serine and Threonine Metabolism	1648	LC/MS Pos	503	676.7	106.05	56-45-1	5951	5736	C00065	HMDB00187	8289307	8131132	8114194	6785108	6893411	7185974	7017400	7973051	7118734	7339103	7001491	7719211	7708831	6406616	5853027	5839193	6844427	7502212	5953057	7443904	8346158	7805568	9309369	7728777	6769173	7268240	7342985	7557693	7499886	7755894	8409304	6561603	6848669	7480819	6921491	7033982
215	serotonin (5HT)	Amino Acid	Tryptophan Metabolism	2342	LC/MS Pos	504	1654	177.102	153-98-0	5202	5013	C00780	HMDB00259	24425320	31139116	30230900	22698746	26581368	23551372	23784514	26310464	17872518	29229654	28252838	26090406	28486190	26470728	11711317	16253087	25470844	23148988	29835908	16645654	30830652	24293118	28096812	31220740	28216670	21724754	23201044	19989474	30030372	21894618	21168710	22434422	19472376	20393470	23357504	15794406
868	sorbitol	Carbohydrate	Fructose, Mannose and Galactose Metabolism	15053	GC/MS	506	1843	319.1	6706-59-8	5780	96680	C00794	HMDB00247	1469649	2030336	2489426	1488727	1694048	1922257	1769229	1920336	1462761	1809548	2200916	1713015	2613548	1586601	1172454	1011425	1763347	1747074	1267946	1589691	1878097	1739262	2998419	2158523	1352001	1548174	1391083	1662452	1776053	1497011	1398164	1131849	1754787	1215453	1798588	1059398
358	spermidine	Amino Acid	Polyamine Metabolism	485	GC/MS	50	1998.9	144	124-20-9	1102	1071	C00315	HMDB01257	1463699	2300585	1271220	1441323	1693208	619280	622903	756275	368476	526269	2160154	1581308	4192160	834517	2615566	479363	599093	255023	748073	93574	1834637		2697904	1418460	2062720	452271	428264	310130	573505	334613	963452	1076961	1362316	1859466	1053863	359687
357	spermine	Amino Acid	Polyamine Metabolism	603	LC/MS Pos	507	500.4	203.223	71-44-3	1103	1072	C00750	HMDB01256	14838215	9145922	15423989	14709480	16086186	24837792	19032798	15102232	17492892	18522938	17369222	18128392	17760112	26922800	27151426	9651009	22024520	23451506	34642568	17695900	5607402	10371981	18208330	7256045	15265473	19558730	25685246	21594544	17619584	21306378	14233067	16265929	14613448	16442207	15562415	13356491
1550	sphinganine	Lipid	Sphingolipid Metabolism	17769	LC/MS Pos	313	5178.3	302.305	3102-56-5	3126	3014	C00836	HMDB00269	130691872	139785456	126635000	142225088	131792640	124385928	182303856	145957568	155816272	145301920	138084800	158930704	132508456	155323952	91176168	122885672	112905800	147212160	109906512	134455792	207126496	181207456	142472544	181748384	149467280	242193472	209194896	200212128	209519584	245389296	181632832	173889520	150653856	153881280	186505280	182911536
1559	sphingosine	Lipid	Sphingolipid Metabolism	17747	LC/MS Pos	297	5179.9	300.29	123-78-4	5353955	4510275	C00319	HMDB00252	183125376	201113360	191246320	207606976	170040416	175762880	207691488	171035296	198071008	174970832	185043536	210788384	183939696	188462672	134461392	136631456	152869696	190266304	173590208	172798384	226308480	239275680	169174256	237983920	206953872	282490464	267738160	251067056	262041504	280295840	203490224	236409904	207627920	199326016	250598672	220719472
1558	sphingosine 1-phosphate	Lipid	Sphingolipid Metabolism	34445	LC/MS Pos	100000626	5543	380.256	26993-30-6	5283560	4446673	C06124	HMDB00277	7718698	11209054	9176772	11365507	10311398	9191458	10269665	7326652	9414505	6759868	7590155	11180081	6694821	6921938	7644313	9054960	8547663	9530759	10719298	9863581	8039061	6066023	7541584	5724658	6854051	3869653	5513298	4948758	3459641	4352532	6794109	7275705	7442818	7103271	7687837	6239062
2874	stachydrine	Xenobiotics	Food Component/Plant	34384	LC/MS Pos	100001296	838.7	144.102	4136-37-2	115244	103115	C10172	HMDB04827	52749124	53464764	52496568	60690888	52310100	49633324	40284620	40706748	35230256	38568092	55487692	55980880	55183724	40935412	45855324	35630808	50649432	45185428	44707904	37341156	43421488	51061624	65747020	53869988	47768728	39825680	41293900	46033468	42300724	30693780	46485872	50732852	42742672	49730584	57318004	35372920
985	stearate (18:0)	Lipid	Long Chain Fatty Acid	1358	LC/MS Neg	439	5872	283.264	57-11-4	5281	5091	C01530	HMDB00827	2174880768	1980643456	1762755200	2749709568	2291913984	1780414720	1962801536	2008786304	2611974144	1724986752	2180214784	2458210048	2532765696	2282788352	2255298560	1649410688	1956374528	1784835584	2071780224	1860362752	2168823808	2567270912	2354759424	2029692800	2876007424	2226684416	2400105984	2862970368	2134460160	2336525824	1810096768	2857619200	2393157120	2737354752	2579584000	2133099136
1012	stearidonate (18:4n3)	Lipid	Polyunsaturated Fatty Acid (n3 and n6)	33969	LC/MS Neg	100001229	5395	275.202	111174-40-4	5312508	4471933	C16300	HMDB06547	5629216	2924397	2007653	4348734	4494236	1994989	2773467	4797543	5900899	2613221	8411026	3897145	9516012	3014970	5655204	4307519	4013638	2228590	3153607	3327200	13328319	6535316	7970378	2930656	5212690	4033537	3875440	4435433	3249335	3457535	5141654	11231938	5762407	6099334	13752233	4553214
1554	stearoyl sphingomyelin	Lipid	Sphingolipid Metabolism	19503	LC/MS Polar	1538	979	775.597	85187-10-6;85187-10-6	6453725	4956085	C00550	HMDB01348	313069		328782	231102	190851	242356	278475	336512	238810	334191	405002	219177	458574	402608	349143	412578	418037	250640	309132	261400	374478	290395	309583	334159	270791	248800	406007	279764	433768	292403	237675	402257	343066	328903	314238	435730
1492	stearoyl-arachidonoyl-glycerophosphocholine (1)*	Lipid	Lysolipid	48386	LC/MS Polar	100006135	869	854.591					HMDB08049		12438297	5418619		6033923	4767128	19587526	406060	5195702		31911	13842406	174077	45996		428186	370289	6775094	5223503	17159802	187503	409935	5737976		15856461	6652789	18952740	9001415	736182	7445349	4525630	1028654		600449		148415
1493	stearoyl-arachidonoyl-glycerophosphocholine (2)*	Lipid	Lysolipid	48393	LC/MS Polar	100006158	790	854.591					HMDB08049	21669108	16785166	18846228	21082486	19847314	25844608	26524450	28119306	26970792	26300634	23126002	17708476	20090180	16908590	17218296	33038564	25124478	24400588	26697728	25219576	27894924	17428036	18615834	21961624	19681978	29719696	29629004	25674542	30857270	28120844	22786144	27545256	25503312	25215422	29202834	29454448
1494	stearoyl-arachidonoyl-glycerophosphoinositol (1)*	Lipid	Lysolipid	48282	LC/MS Polar	100006136	897	885.549					HMDB09815	10640588	7546774	11524247	8075961	11432363	8111671	10071221	11300939	10458642	10283003	10867026	8536228	10915847	9902414	8662392	12835677	9624114	10673781	8191730	10351257	12743027	9805420	9405810	10961641	9705644	11245529	11916193	9363490	11720977	9108524	9204948	12527962	11125805	12133503	11762720	12203245
1506	stearoyl-arachidonoyl-glycerophosphoserine (1)*	Lipid	Lysolipid	48502	LC/MS Polar	100006322	888	810.529					HMDB12383	14267655	9581741	15911469	10816516	15027848	14304177	14723625	15682268	13508821	13422951	13586831	14631395	13162087	13066552	12985573	19279132	12463154	16375776	12986002	14910701	15852442	14464218	11855445	16560187	11091029	15685811	13173582	11805072	14761363	13964784	14644792	15378074	13480924	14337814	14438800	15512526
1196	stearoylcarnitine	Lipid	Fatty Acid Metabolism(Acyl Carnitine)	34409	LC/MS Pos	100001391	5256	428.373	18822-91-8	6426855	21233653		HMDB00848	44312428	49178908	56782608	55518188	51851996	73086920	72982992	62090292	75577824	75577824	48528896	47638152	38510048	40339732	49184472	53984792	60324220	63523232	58154748	62500296	48541608	33152686	42736440	59566380	50781600	73191776	78719936	62418532	84377752	72966800	52844872	53839280	50314140	47444408	52699564	52074388
1095	suberate (octanedioate)	Lipid	Fatty Acid, Dicarboxylate	15730	LC/MS Neg	100000016	804.3	173.082	505-48-6	10457	10025	C08278	HMDB00893	1708794	939728	1368153	1095806	1096569	1375505	1026443	1130847	831310	1656724	1998868	1287107	1698824	1431875	987628	538880	1219432	1037466	686222	1036160	1473449	1027269	1541250	615232	1359112	981467	757688	929147	1380528	903746	719701	1539806	1295933	1166133	1648276	987518
951	succinate	Energy	TCA Cycle	1437	LC/MS Neg	252	603	117.019	110-15-6	1110	1078	C00042	HMDB00254	804842880	854746048	971533696	727110976	943819392	935402944	827415104	945035840	387494784	938877632	1194068608	921862464	888756800	817832896	696607488	475009984	823683456	917205120	669005696	648458368	794119424	659939200	1076330240	813133120	830071744	619439040	516910464	549019648	925373760	437197888	728247872	670467200	636565952	551065920	677875712	428213376
950	succinylcarnitine	Energy	TCA Cycle	37058	LC/MS Pos	100001948	1419	262.129					HMDB61717	4576558	4416500	5108203	4376032	4847633	2131893	2240549	2455900	2409032	2289894	3824241	4367904	4438472	4456076	3021744	1865885	1691524	2427276	2961152	1891340	4627254	3849287	5244992	4587202	4570212	1712020	2222422	2022204	2776130	2112230	3114940	3621428	3514555	3946931	3309459	2003712
3230	sulfate*	Xenobiotics	Chemical	46960	LC/MS Neg	100002528	616	96.9601	14808-79-8	1118	1086	C00059	HMDB01448	68999608	81704528	82299040	80254016	82856216	61770344	79679000	71683080	83167392	57584008	89977160	79976584	82581112	40245276	34291356	82700016	63363352	59763844	67537192	62294508	91903048	80048592	76323064	77827176	70605688	53252636	75228248	89752792	64264412	77394336	90793088	89503704	92277936	82322568	124709608	69762168
2879	tartarate	Xenobiotics	Food Component/Plant	15336	LC/MS Neg	100000295	615.3	149.009	87-69-4;6106-24-7	444305	852	C00898	HMDB00956									97791680
311	taurine	Amino Acid	Methionine, Cysteine, SAM and Taurine Metabolism	2125	LC/MS Neg	512	690	124.007	107-35-7	1123	1091	C00245	HMDB00251	26328232	30989860	29893512	29798426	32364658	35050400	34397656	32076584	36888320	32710464	30325764	25828964	29071454	23739330	10452742	32806774	33949952	29696024	36572416	29628428	29709610	28563152	29505940	29921726	33658016	31522982	31674140	34561524	36109112	32930668	28440278	30881380	32965804	32403916	34383744	32023278
1761	tauro-alpha-muricholate	Lipid	Primary Bile Acid Metabolism	42605	LC/MS Neg	100004064	4745	514.284						5246374	5450241	3899122	5615259	6101346	5988592	8937590	15383941	9081352	11909612	16052625	7393746	15026280	6564003	5793065	2782978	12776716	7469189	3989230	7126834	13773422	7795459	6246724	7159942	5866528	3308011	7912778	6528062	13452124	10929908	9833272	9691001	8655154	13356382	12192204	4153427
1762	tauro-beta-muricholate	Lipid	Primary Bile Acid Metabolism	33983	LC/MS Neg	100001250	4774	514.284	25696-60-0	168408	147312		HMDB00932	2084462	1500849	1358098	1360995	2418327	3175523	3722814	7965765	4064803	6228255	5050562	2465331	6502905	3412187	2064782	1553413	5086443	2689611	1821184	4191566	8365358	1840759	1545338	2038894	936793	2107883	3431274	2952174	7568343	4993336	4539403	1308357	2230410	3683716	4127083	1631403
1758	taurochenodeoxycholate	Lipid	Primary Bile Acid Metabolism	18494	LC/MS Neg	1629	5250	498.289	6009-98-9	387316	343282	C05465	HMDB00951	4693250	4711627	2939272	3388999	3874897	5221710	7572380	10826653	6597563	8830331	9480055	3974148	9716910	3927070	3056616	2673411	10891426	4797901	3436053	7081493	8480281	4842743	4616060	3281062	3672866	2463456	6175821	5539938	9447414	10803016	5415198	5413730	4867328	8316107	7877542	3560938
1755	taurocholate	Lipid	Primary Bile Acid Metabolism	18497	LC/MS Neg	1648	5150	514.284	145-42-6	6675		C05122	HMDB00036	4756433	6520982	3539240	7670591	5241304	11115177	11919855	22203682	15863181	16412989	10184510	3501559	16290242	6803186	5306496	3395427	21091128	12897997	5525237	11247165	10684905	6580418	4951754	6500658	3735066	5352621	11277186	9648358	18468546	12602077	6521324	5823586	6355015	10598715	11088333	5216687
1794	taurocholenate sulfate	Lipid	Secondary Bile Acid Metabolism	32807	LC/MS Neg	100001990	4750	279.614						27540		59380	77196	41421	41118	83615	148746		57615	99567	258223	228459	353761	157471	45315	43279	34188		70750	229487	55611	109652	5499	64626	19195	79111	37046	35863		105293	59755	151647	92278	393334
1766	taurodeoxycholate	Lipid	Secondary Bile Acid Metabolism	12261	LC/MS Neg	1668	5257.4	498.289	207737-97-1	2733768	2015539	C05463	HMDB00896	992470	661958	499280	596630	480924	1904950	3660463	4091808	5159096	3648037	1410216	943023	1678055	1155010	600012	1110721	4008611	2632903	1273075	2504085	3287579	1272789	1017751	778118	1255034	1060439	2336568	1140718	3560352	3911269	1133777	2322458	1927900	1954870	1705139	1169940
1787	taurohyodeoxycholic acid	Lipid	Secondary Bile Acid Metabolism	43588	LC/MS Neg	100003869	5073	498.289	38411-85-7	119046	106373			2422567	1579603	1258582	1701876	3659100	11100344	12928412	26063374	11658666	14938939	6253215	2286566	8372416	2370442	4539116	6093013	12160587	10998246	5644861	5700462	11658666	2105582	3759641	5446235	1440292	2263245	5231573	5458319	16192344	15338508	8105004	3786086	6852201	2370350	10224990	4104026
1772	taurolithocholate	Lipid	Secondary Bile Acid Metabolism	31889	LC/MS Neg	100001065	5345	482.295	516-90-5	10595	10150	C02592	HMDB00722	27251					53594	99679	74735	322735	49237	38734		87813				208660	170625	45255	69970	118379	69244	39555	21000			75560	57577	195842	364454		84087	45098	66528	116363
1773	taurolithocholate 3-sulfate	Lipid	Secondary Bile Acid Metabolism	36850	LC/MS Neg	100001658	5026.7	280.622	64936-83-0	440071	389078	C03642	HMDB02580	119885	62825	59211	119552	78748	239415	301829	248077	355286	312133	184165	104103	189415	89851	80082	112231	341137	293977	99529	134290	296612	148283	112050	130399	74984	154443	395579	201531	355344	424308	140814	189694	162700	156814	389883	54106
1777	tauroursodeoxycholate	Lipid	Secondary Bile Acid Metabolism	39378	LC/MS Neg	100002912	5025	498.289	14605-22-2	9848818	24539842		HMDB00874	132307	180741	176402	180006	187522	222772	373931	487634	437869	553037	488104	158774	463784	240110	242976	128564	556349	319762	155438	373354	695463	294280	226936	207687	140951	159455	235128	217049	727369	739309	240909	351498	380755	453067	538598	181743
1103	tetradecanedioate	Lipid	Fatty Acid, Dicarboxylate	35669	LC/MS Neg	100001613	4000	257.176	821-38-5	13185	12630		HMDB00872	3221882	1778551	2981656	2620244	2646104	2317929	2354301	3508693	2835811	2172103	6912202	2143012	3974210	3269200	3330125	1060932	1746642	2274134	1130416	1766026	4025871	2735377	3899898	3020144	2740764	2121774	1750379	1842940	2612390	1835663	4092232	6369450	4939966	4217461	6443402	2988075
2484	thiamin (Vitamin B1)	Cofactors and Vitamins	Thiamine Metabolism	5341	LC/MS Neg	873	1726	263.097	59-43-8	1130		C00378	HMDB00325	706390	840837	863817	827069	801665	735891	666186	671931	399325	590248	887068	1032741	864511	863041	749108	480087	734889	676981	732302	644840	914651	866279	864431	824479	771810	689817	564665	550411	687437	543303	810290	633707	631250	746907	791191	499827
2486	thiamin diphosphate	Cofactors and Vitamins	Thiamine Metabolism	35670	LC/MS Neg	522	1195.1	423.03	154-87-0	1132	8715	C00068	HMDB01372	531457	458544	508529	518215	513946	433277	401654	376730	357438	368242	508498	535083	549823	445280	415216	329023	366857	345982	438073	364486	471249	401475	536728	428138	462568	363740	366788	382659	345372	312232	436012	435817	424053	456745	516138	257513
2434	threonate	Cofactors and Vitamins	Ascorbate and Aldarate Metabolism	27738	LC/MS Polar	100001022	2384	135.03	70753-61-6	151152	133224	C01620	HMDB00943	211087824	190270032	233806592	196817328	182886592	236206832	292589120	246775536	192815104	267594672	284773920	225562480	316303584	180582832	346498688	228769344	250731392	240236832	220575024	198903888	234520944	161111872	159211936	150267216	117997792	134275680	115848848	132028984	210745520	108269328	190633072	169670160	191743792	162006816	380262752	125171880
14	threonine	Amino Acid	Glycine, Serine and Threonine Metabolism	1284	LC/MS Pos	564	701.5	120.066	72-19-5	6288	6051	C00188	HMDB00167	117401888	109267432	108253488	84520648	97615784	99678312	90204168	79497728	99285744	102582432	81920376	96349256	99011872	89489360	85583048	83402616	114264408	114156400	110610304	95217600	110001016	98997880	82073296	85616624	88121640	73637792	81628584	85441632	89835680	113389704	69448200	92802032	91584664	96620616	74793288	64695840
1264	thromboxane B2	Lipid	Eicosanoid	17807	LC/MS Neg	1308	4526	369.228	54397-85-2	5283137	4446261	C05963	HMDB03252	311189	450544	443494	1320873	1226491		227835	832048	401866	352191	595839	2016178	1209988	1283930	601148	312253	458902	222980	343252	654866	1768778	1509184	1828721	1113434	1664672	1627622	1432012	1771489	1306349	2033769	1314272	1720202	1376261	1396040	466095	2151399
2389	thymidine	Nucleotide	Pyrimidine Metabolism, Thymine containing	2183	LC/MS Neg	872	1963.7	241.083	50-89-5	5789	5585	C00214	HMDB00273	2445891	3092672	2259389	2703796	2551550	4679724	6068679	4290053	5820448	4928429	3277982	2338898	2785165	2331087	2929165	6364856	3190892	3881986	6332845	3898912	2618682	3022607	1994259	2838312	3006896	3904055	4376835	4875677	3701051	5563226	3037512	3492053	3353343	3425760	3086160	4766023
2390	thymine	Nucleotide	Pyrimidine Metabolism, Thymine containing	604	LC/MS Neg	882	1654	125.036	65-71-4	1135	1103	C00178	HMDB00262	369771	528044	390550	430104	438363	300602	601004	312952	457271	427292	452711	410551	389824	382430	569827	442640	286449	367376	565902	319452	542457	701373	362662	526944	601649	406289	656594	582579	757005	875431	477319	433074	526899	554403	442605	477470
269	tigloylglycine	Amino Acid	Leucine, Isoleucine and Valine Metabolism	1598	LC/MS Pos	1161	2518	158.081	35842-45-6	6441567	4945715		HMDB00959	4523382	2932336	3808136	2212329	4304000	3221776	3966728	3552272	2384884	3695680	3509182	3357663	3142438	4403124	1803318	1441129	3371015	3400157	2620370	3210813	3407983	2884820	3985599	2588571	2810498	2414414	1900237	1939936	3069033	1563424	2826729	2616028	2680975	2618477	3517012	1899326
268	tiglyl carnitine	Amino Acid	Leucine, Isoleucine and Valine Metabolism	35428	LC/MS Pos	100001597	2354	244.154	64191-86-2	22833596	17216200		HMDB02366	754704	306107	382170	800894	616034	519362	571882	412110	506798	529598	617576	622437	659596	681758	609526	229861	522013	518476	569125	529179	326338	453715	582989	447015	534429	376452	459609	452561	516137	401091	463254	408349	423750	601296	477283	292397
339	trans-4-hydroxyproline	Amino Acid	Urea cycle; Arginine and Proline Metabolism	32306	LC/MS Pos	1001	685	132.066	51-35-4	5810	5605	C01157	HMDB00725	36944920	31995912	28883750	28079174	24879494	31783678	21101770	20455648	22579132	29285156	35759908	30664882	27911440	30048756	42856620	25199282	20228370	20966232	28474574	20339328	41322136	31987768	25079488	37947220	25853580	30764980	22773808	22129402	20966332	24273002	38894600	28512048	28318766	28687682	28305746	26822422
58	trans-urocanate	Amino Acid	Histidine Metabolism	607	LC/MS Pos	537	1125.4	139.05	104-98-3	736715	643824	C00785	HMDB00301	574245	1340882	949977	652637	2000709	494531	328385	722468	599456	461193	668996	1191405	842475	1124004	673592	2557870	1574765	872920	995050	1127163	901016	874771	1039947	721101	724358	384067	874900	491294	585000	649963	531446	826237	664252	1012894	914754	377677
2416	trigonelline (N'-methylnicotinate)	Cofactors and Vitamins	Nicotinate and Nicotinamide Metabolism	32401	LC/MS Pos	100001092	771.8	138.055	535-83-1	5570	5369	C01004	HMDB00875	128636480	120166920	132864960	134497632	119524560	91969896	85751936	88287672	65297712	88231112	113301296	136726864	120513824	108906856	106654488	86781848	93075824	97813480	89669912	84807480	96684968	102425360	122569264	121608384	120815880	84672952	81428984	79819608	81327504	50462428	92473824	103724096	82240448	98030216	110662120	66047728
189	tryptophan	Amino Acid	Tryptophan Metabolism	54	LC/MS Pos	565	2440	205.097	73-22-3	6305	6066	C00078	HMDB00929	1130179456	1100166144	1076094976	1059381184	1032467072	1171174784	1169501696	1100074368	1292483968	1239244800	942919104	1040513408	952144512	932560896	878686208	961894208	1149037440	998845696	1034257600	1122093696	1014393280	1021781184	998501504	1077377152	933239808	1065812096	1134052608	1276950016	1144014592	1222923520	839769472	990214592	880890368	1015885696	934530240	936851968
109	tyrosine	Amino Acid	Phenylalanine and Tyrosine Metabolism	1299	LC/MS Pos	815	1516.3	182.081	60-18-4	6057	5833	C00082	HMDB00158	552691264	665487296	602050496	681435328	590201408	580059776	514246944	615723008	655862464	576063488	577033856	774096192	601798976	604185536	531513632	307797408	637894016	504050432	473711392	585189248	793125376	751534848	773877248	605674688	554853312	589028736	575874752	563852032	787634240	653547456	470124352	539361472	433783680	582047616	656088128	505359840
2349	uracil	Nucleotide	Pyrimidine Metabolism, Uracil containing	605	LC/MS Neg	825	1086	111.02	66-22-8	1174	1141	C00106	HMDB00300	17728068	23598706	24081654	22904260	28147936	13523568	15819931	12325095	11500454	16524058	33370184	27291610	27522054	26127184	33135890	11437400	18770556	18984842	17235822	13689432	31662006	33493656	29761886	30099448	32726730	14944444	18768790	17763472	29147642	21485354	25840556	22866234	26459342	26964280	22216806	13506796
2270	urate	Nucleotide	Purine Metabolism, (Hypo)Xanthine/Inosine containing	1604	LC/MS Neg	1134	757.1	167.021	69-93-2;120K5305	1175		C00366	HMDB00289	278138080	326907744	345932288	285088704	357859520	276948032	263090640	287573088	110634256	273664000	403436768	358020160	388715680	345605536	326923648	176779008	310147456	250800960	291278144	212067808	361911104	342622432	414607872	378289024	307777888	267127360	243727376	216690560	324681664	212329424	330302976	265122384	256866016	282657248	343877184	200687168
319	urea	Amino Acid	Urea cycle; Arginine and Proline Metabolism	1670	LC/MS Neg	533	720	103.015	57-13-6	1176	1143	C00086	HMDB00294	7598210	6233345	5893917	6874408	5463762	6983642	4729298	5672894	7574387	6880566	6473711	4833647	5927204	4179980	4995530	4414577	6105046	6003197	6102410	6322684	4241033	3760147	3902008	6037027	5022915	5377664	5161659	6636253	6964739	6093407	4486196	6220641	5568760	5493997	5579419	4377862
2348	uridine	Nucleotide	Pyrimidine Metabolism, Uracil containing	606	LC/MS Pos	535	1501.5	245.077	58-96-8	6029	5807	C00299	HMDB00296	5814781	7481518	8683974	11023991	9237081	4972676	7600027	7725451	3647519	6542985	11468385	13857435	13102502	10079252	14566352	4564105	8618220	11063242	3096291	3957776	7715795	5373302	14879306	6666750	8149437	2642442	2423993	2925318	2753457	2096203	5755384	8229871	9037189	6939808	4876915	2008498
2344	uridine monophosphate (5' or 3')	Nucleotide	Pyrimidine Metabolism, Uracil containing	39892	LC/MS Pos	100003366	1100	325.043	58-97-9	6030		C01368, C00105	HMDB00288	3318270	3750750	4447678	3079209	3352185	2139871	2322478	1328064	2148986	1922653	2436185	2569790	2569825	2317389	535598	1586652	1231458	1911862	1802188	1540297	2586846	3192995	1911440	3293458	2607687	3155314	2994814	5008341	3207772	3611512	2514394	1938743	2367319	2226396	4011179	2559988
1185	valerylcarnitine	Lipid	Fatty Acid Metabolism(Acyl Carnitine)	34406	LC/MS Pos	100001394	2555	246.17		6426903	4932322		HMDB13128	14428851	12233460	18569752	21809840	20260562	31139958	20448148	18064360	12164818	21992472	20260562	25525684	18741156	31413712	21937714	7884121	25483848	50752096	22668498	13864934	8883095	11958233	24417934	27351166	30241720	4230575	6142259	5693604	13731697	5552721	16179576	16002602	17039734	13415326	11333342	6535660
1174	valerylglycine	Lipid	Fatty Acid Metabolism(Acyl Glycine)	36768	LC/MS Neg	100001451	2071	158.082	24003-66-5	4737557	3924818		HMDB00927	5728606	3151951	4556409	2321555	4739557	3841317	3696920	3467862	2005018	3414241	4044179	6719617	5232693	9614107	5325639	1220774	2989504	4938586	3169711	2617024	4033984	4533071	6542227	5285326	6666569	2009590	1604531	1929737	2384359	1322988	4947995	2966524	4408067	3082247	4109904	1962064
274	valine	Amino Acid	Leucine, Isoleucine and Valine Metabolism	1649	LC/MS Pos	566	1042.1	118.086	72-18-4	6287	6050	C00183	HMDB00883	1531658752	1588514816	1591601152	1588136832	1503506944	1301641088	1118108544	1329040768	1290958464	1298453248	1418039808	1659699968	1541769984	1484757504	1329500544	872165120	1539094144	1298608640	1490103808	1281414656	1491097344	1484920064	1485822464	1456819584	1424485376	1167674880	1168379008	1404730368	1383832064	1334821504	1263346816	1402954368	1270320640	1355113856	1441017984	1112113920
701	valylleucine	Peptide	Dipeptide	39994	LC/MS Pos	100003210	2562	231.17	22906-55-4	352039	312586		HMDB29131	378632	610974	528482	489754	499977	1220075	960513	821707	1031260	1113864	590786	565687	439457	334810	479903	742039	715436	524927	1149521	742473	528827	344363	352854	529475	339823	881337	882116	907354	870598	1050535	535360	584731	407635	354624	789026	652272
2263	xanthine	Nucleotide	Purine Metabolism, (Hypo)Xanthine/Inosine containing	3147	LC/MS Neg	1004	908.9	151.026	69-89-6	1188	1151	C00385	HMDB00292	919441	858133	1064970	640913	1160497	619995	695915	1183409	362344	819909	1110780	1069768	1604443	959517	703501	566492	783923	793232	716536	486901	1971481	1250964	1506481	2333403	1106865	638173	437471	539816	1441504	692769	1357474	658372	982205	779784	1263315	643473
2265	xanthosine	Nucleotide	Purine Metabolism, (Hypo)Xanthine/Inosine containing	15136	LC/MS Neg	100000299	1075.3	283.068	146-80-5	64959	58484	C01762	HMDB00299	1107194	1001839	1032575	966364	2121099	2649499	3044879	2230228	997165	2454179	2073704	1843162	2266063	1333383	4734218	2683220	4083417	2156093	10631699	1582145	864872	729762	4956923	1009753	573231	828013	615266	846485	1009513	682446	1697949	741692	995079	827135	3097858	771628
2264	xanthosine 5'-monophosphate (xmp)	Nucleotide	Purine Metabolism, (Hypo)Xanthine/Inosine containing	12024	LC/MS Pos	1251	1428	365.049	25899-70-1	73323	10463791	C00655	HMDB01554	2661520	1445029	1299408	1952242	1565673	678700	685215	1014338	1397461	992163	2429084	1803742	1885145	1791484	27988770	1054544	878533	667527	1025614	894641	4288568	2456635	3576764	4026433	1631741	987478	1187272	1428275	863616	929375	1208813	1356380	1333284	1930410	1965639	710103
206	xanthurenate	Amino Acid	Tryptophan Metabolism	15679	LC/MS Pos	100000015	2655.6	206.045	59-007	5699	5497	C02470	HMDB00881	20336	18288	73207	240257	103994	175844	35722			188355	126590	80839		79164	65501		244995	182341	57276	7558	10362	175844		148928	55922	98485	19869	26060	8925	96426	26841	170146	72073	33487	69465
803	xylitol	Carbohydrate	Pentose Metabolism	4966	GC/MS	543	1677.6	307.2	87-99-0	6912	6646	C00379	HMDB02917	80987	102874	155097	83483	125675	226162	214773	341700	128664	270088	382951	186014	222214	240202	266390	108018	222226	189205	89648	185290	287552	192847	416616	262524	165268	121223	93560	110668	255458	165327	192410	191973	209985	131795	166445	81874
801	xylonate	Carbohydrate	Pentose Metabolism	35638	GC/MS	100001627	1722	292	73686-31-7	6602431	5034782	C05411	HMDB60256	105880	119708	110670	107545	91954	66257	20537		10990	18986	133192	163740	143868	167056	158651	36668	54321		48004	46815	103143	125600	176093	144915	108913	106117	89532	99800	72723	80204	84137	64654	80405	97243	76560	71522
802	xylose	Carbohydrate	Pentose Metabolism	15835	GC/MS	826	1723.9	204	609-06-3	135191	85957	C00181	HMDB00098	376740	292472	424202	513438	273141	441178	200610	201952	577868	229074	442571	244347	372310	372018	629487	179224	252883	431585	619583	250569	305889	586608	451574	412254	365999	216868	205251	204255	143408	282271	251602	608232	384329	313173	424099	230367
799	xylulose	Carbohydrate	Pentose Metabolism	18344	GC/MS	100000421	1668	306.1	551-84-8	5289590	4451524	C00310	HMDB00654	24403	33029	26196		18381	23855		32703	22126	32349	31036		31740		35611	20900	41940				26032	31657	47791	30111	26120	39511	14256	31869	28140		23394	21275	18781	15226		16238
												0.857868	507	with HMDB
												0.142132	84	w/o HMDB
													591	distinct metabolites
												0.868468	482	detectable with HMDB
												0.131532	73	detectable w/o HMBD
													555	detectable metabolites
[truncated: 66 more columns]
