# Supplementary material for: Changes in the Metabolome in Response to Low-Dose Exposure to Environmental Chemicals Used in Personal Care Products during Different Windows of Susceptibility
Source: PLoS One. 2016 Jul 28;11(7):e0159919. doi: 10.1371/journal.pone.0159919 (PMC4965097; doi:10.1371/journal.pone.0159919)
Supplement: S7 Table — (XLSX) [file pone.0159919.s010.xlsx]

## Sheet: S7 Table
S7 Table. Metabolites significantly changed by exposure to endocrine disruptors at the adult developmental window.
	p.value	-LOG10(p)	FDR
pyridoxal	3.6974e-07	6.4321	0.00021075
5-oxoproline	6.8847e-06	5.1621	0.0019621		p.value	The result for the non-parametric ANOVA (Kruskal Wallis) with the 5 different treatment groups.
2'-deoxyuridine	3.2329e-05	4.4904	0.0061426		-LOG10(p)	minus log base 10 of p value
cis-4-decenoyl carnitine	6.798e-05	4.1676	0.0096871		FDR	False Discovery Rate
fructose	0.00011519	3.9386	0.013132
adenosine-5'-diphosphoglucose	0.00016596	3.78	0.01491
adenine	0.00018385	3.7355	0.01491
5-hydroxyindoleacetate	0.00022121	3.6552	0.01491
gamma-glutamylisoleucine*	0.00025989	3.5852	0.01491
2,3-diphosphoglycerate	0.00027413	3.562	0.01491
O-sulfo-L-tyrosine	0.00028774	3.541	0.01491
N-acetylhistamine	0.00053637	3.2705	0.025478
carnitine	0.00070369	3.1526	0.030854
pyruvate	0.00084366	3.0738	0.034349
gamma-glutamylphenylalanine	0.0013534	2.8686	0.046901
indolelactate	0.001397	2.8548	0.046901
1-methylurate	0.0013988	2.8542	0.046901
12-HETE	0.0015096	2.8211	0.047804
gamma-glutamylvaline	0.0019873	2.7017	0.059619
choline	0.002546	2.5941	0.07256
inosine 5'-monophosphate (IMP)	0.002701	2.5685	0.072702
daidzein	0.0029198	2.5346	0.072702
asparagine	0.0029505	2.5301	0.072702
hippurate	0.0030611	2.5141	0.072702
phenylacetylcarnitine	0.0033041	2.4809	0.073467
proline	0.003377	2.4715	0.073467
2'-deoxycytidine	0.00348	2.4584	0.073467
phenylcarnitine*	0.0041234	2.3847	0.081135
2-palmitoylglycerol (2-monopalmitin)	0.0041595	2.381	0.081135
methionine	0.0043779	2.3587	0.081135
mevalonate	0.0044126	2.3553	0.081135
docosapentaenoate (n6 DPA; 22:5n6)	0.0046983	2.3281	0.083688
gamma-glutamylleucine	0.0050396	2.2976	0.084036
gamma-glutamylthreonine*	0.0050417	2.2974	0.084036
3-indoxyl sulfate	0.0051601	2.2873	0.084036
docosadienoate (22:2n6)	0.0055608	2.2549	0.087133
nicotinate	0.0058042	2.2363	0.087133
erythronate*	0.0058089	2.2359	0.087133
alpha-CEHC glucuronide*	0.0061372	2.212	0.087455
dihomo-linoleate (20:2n6)	0.0061575	2.2106	0.087455
homoserine	0.0062907	2.2013	0.087455
histidine	0.0068071	2.167	0.09002
3-phosphoglycerate	0.0068748	2.1627	0.09002
linoleate (18:2n6)	0.0069489	2.1581	0.09002
gamma-glutamylalanine	0.0071996	2.1427	0.091194
creatine phosphate	0.0073843	2.1317	0.091502
phenylpyruvate	0.007937	2.1003	0.096257
adrenate (22:4n6)	0.0083621	2.0777	0.0993
kynurenine	0.0092196	2.0353	0.10588
methionine sulfoxide	0.0092878	2.0321	0.10588
hypoxanthine	0.010018	1.9992	0.11087
N-acetylhistidine	0.010209	1.991	0.11087
4-hydroxyhippurate	0.010309	1.9868	0.11087
stachydrine	0.01131	1.9465	0.11802
anthranilate	0.01145	1.9412	0.11802
kynurenate	0.011595	1.9357	0.11802
alanine	0.012406	1.9064	0.12406
hexanoylcarnitine	0.012853	1.891	0.12631
salicylate	0.013666	1.8644	0.13015
pipecolate	0.01406	1.852	0.13015
1-palmitoylglycerophosphocholine (16:0)	0.014146	1.8494	0.13015
eicosenoate (20:1n9 or 11)	0.014157	1.849	0.13015
mevalonolactone	0.01447	1.8395	0.13092
sphinganine	0.014899	1.8268	0.13269
4-vinylphenol sulfate	0.015191	1.8184	0.13322
alpha-ketoglutarate	0.015666	1.8051	0.13529
S-(3-hydroxypropyl)mercapturic acid (HPMA)	0.016034	1.795	0.13641
genistein	0.016613	1.7796	0.13779
acetylcarnitine	0.016868	1.7729	0.13779
N1-methyladenosine	0.017149	1.7657	0.13779
indolin-2-one	0.017163	1.7654	0.13779
4-ethylphenylsulfate	0.017407	1.7593	0.13781
3-hydroxypyridine sulfate	0.017985	1.7451	0.14043
gamma-glutamyltryptophan	0.018542	1.7319	0.14282
1-linoleoylglycerol (1-monolinolein)	0.018936	1.7227	0.14392
dihomo-linolenate (20:3n3 or n6)	0.01949	1.7102	0.14618
ascorbate (Vitamin C)	0.020338	1.6917	0.15055
serine	0.020654	1.685	0.15093
glutamine	0.021838	1.6608	0.15648
butyrylcarnitine	0.021962	1.6583	0.15648
ferulic acid 4-sulfate	0.022306	1.6516	0.15697
taurolithocholate	0.022932	1.6396	0.15862
1-methylnicotinamide	0.023106	1.6363	0.15862
picolinate	0.023375	1.6312	0.15862
valine	0.023742	1.6245	0.15921
N-acetyl-beta-alanine	0.024478	1.6112	0.16138
threonine	0.024631	1.6085	0.16138
2-aminoheptanoate	0.024928	1.6033	0.16146
4-acetamidobutanoate	0.025248	1.5978	0.1617
mannitol/sorbitol	0.02589	1.5869	0.16172
2,8-quinolinediol	0.026035	1.5844	0.16172
beta-hydroxyisovaleroylcarnitine	0.026569	1.5756	0.16172
N6-acetyllysine	0.027095	1.5671	0.16172
1-oleoylglycerophosphoserine	0.027186	1.5656	0.16172
4-allylphenol sulfate	0.027298	1.5639	0.16172
mead acid (20:3n9)	0.027331	1.5633	0.16172
pentadecanoate (15:0)	0.028035	1.5523	0.16172
tiglyl carnitine	0.028035	1.5523	0.16172
1-methylimidazoleacetate	0.028088	1.5515	0.16172
5-methylthioadenosine (MTA)	0.02858	1.5439	0.16268
5-methyluridine (ribothymidine)	0.028826	1.5402	0.16268
alpha-hydroxyisovalerate	0.029803	1.5257	0.16396
1-palmitoleoylglycerophosphocholine (16:1)*	0.029811	1.5256	0.16396
2-linoleoylglycerol (2-monolinolein)	0.03022	1.5197	0.16396
3-hydroxyindolin-2-one sulfate	0.030316	1.5183	0.16396
taurochenodeoxycholate	0.030727	1.5125	0.16396
cis-vaccenate (18:1n7)	0.03107	1.5077	0.16396
taurolithocholate 3-sulfate	0.031471	1.5021	0.16396
succinylcarnitine	0.031762	1.4981	0.16396
O-methylcatechol sulfate	0.031791	1.4977	0.16396
3-hydroxyisobutyrate	0.031928	1.4958	0.16396
erythritol	0.03241	1.4893	0.16494
N-acetylserine	0.033126	1.4798	0.1671
3-hydroxycinnamate sulfate	0.033442	1.4757	0.16721
3-hydroxybutyrate (BHBA)	0.033907	1.4697	0.16806
N-acetylthreonine	0.034352	1.4641	0.1688
phosphate	0.034843	1.4579	0.16937
piperidine	0.035063	1.4551	0.16937
1-linoleoylglycerophosphocholine (18:2n6)	0.035621	1.4483	0.17062
1-palmitoylglycerophosphoserine*	0.036161	1.4418	0.17159
1-linolenoylglycerol	0.036426	1.4386	0.17159
leucylglycine	0.037936	1.4209	0.17587
2-piperidinone	0.03795	1.4208	0.17587
pyrraline	0.040124	1.3966	0.18444
5-aminovalerate	0.042009	1.3767	0.1894
4-hydroxybutyrate (GHB)	0.042093	1.3758	0.1894
N1-methylguanosine	0.042199	1.3747	0.1894
phenylacetylglycine	0.043469	1.3618	0.19083
4-imidazoleacetate	0.044202	1.3546	0.19083
thiamin (Vitamin B1)	0.044344	1.3532	0.19083
hydroquinone sulfate	0.044505	1.3516	0.19083
dimethylglycine	0.044531	1.3513	0.19083
1-dihomo-linolenylglycerol (alpha, gamma)	0.044911	1.3476	0.19083
lysine	0.045197	1.3449	0.19083
N-acetylglycine	0.045197	1.3449	0.19083
myo-inositol	0.045908	1.3381	0.19232
N-methyl proline	0.046276	1.3346	0.19232
tryptophan	0.046757	1.3302	0.19232
biopterin	0.046899	1.3288	0.19232
docosapentaenoate (n3 DPA; 22:5n3)	0.047826	1.3203	0.19472
N-acetylglucosamine	0.048572	1.3136	0.19483
10-undecenoate (11:1n1)	0.048709	1.3124	0.19483
palmitoleoyl sphingomyelin*	0.048879	1.3109	0.19483
thymine	0.049917	1.3018	0.19653
phenol sulfate	0.049994	1.3011	0.19653
